# Supplementary material for: Risk factors and clinical outcomes of functional decline during hospitalisation in very old patients with acute decompensated heart failure: an observational study
Source: PubMed Central journal article supplement — BMJ Open. 2020 Feb 16;10(2):e032674. doi: 10.1136/bmjopen-2019-032674 (PMC7044905; doi:10.1136/bmjopen-2019-032674), 2020-02-16

## Supplementary Online Content

**eTable 1.** Number of missing values in in the entire cohort

**eTable 2.** Clinical factors associated with functional decline or in-hospital mortality in the univariate and multivariable analyses in a total of 4056 patients

**eFigure 1.** The details of functional decline during ADHF Hospitalization.

**eFigure 2.** Subgroup analysis for the association of functional decline with no functional decline on the primary outcome measure.

**eTable 1. Number of missing values in the entire cohort**

|                     | Entire Cohort (N=3555) |          |
|---------------------|------------------------|----------|
|                     | Number                 | Rate (%) |
| Tests at admission  |                        |          |
| BNP or NT-proBNP *  | 41                     | 1.15     |
| Serum creatinine    | 5                      | 0.14     |
| eGFR                | 5                      | 0.14     |
| Blood urea nitrogen | 8                      | 0.22     |
| Albumin             | 100                    | 2.81     |
| Sodium              | 11                     | 0.31     |
| Potassium           | 11                     | 0.31     |
| Haemoglobin         | 6                      | 0.17     |

\* BNP values were reported for 3140 patients in the entire cohort; NT-proBNP values were reported for 633 patients in the entire cohort.

Abbreviation: BNP, brain-type natriuretic peptide; NT-proBNP, N-terminal-proBNP; eGFR, estimated glomerular filtration rate.

**eTable 2. Clinical factors associated with functional decline or in-hospital mortality in the univariate and multivariable analyses in a total of 4056 patients**

| Variables                          | Unadjusted OR<br>(95% CI) | P Value | Adjusted OR<br>(95% CI) | P Value |
|------------------------------------|---------------------------|---------|-------------------------|---------|
| Age ≥80 years                      | 2.97 (2.50–3.52)          | <0.001  | 2.32 (1.86–2.89)        | <0.001  |
| Women                              | 1.45 (1.25–1.70)          | <0.001  | 1.13 (0.93–1.38)        | 0.22    |
| BMI ≤22                            | 1.56 (1.32–1.83)          | <0.001  | 1.21 (1.00–1.47)        | 0.053   |
| Prior HF hospitalization           | 1.08 (0.92–1.27)          | 0.36    | 0.96 (0.79–1.18)        | 0.72    |
| Acute coronary syndrome            | 1.56 (1.16–2.11)          | 0.003   | 1.76 (1.19–2.60)        | 0.005   |
| Hypertension                       | 1.00 (0.85–1.20)          | 0.95    | 0.96 (0.77–1.21)        | 0.75    |
| Diabetes mellitus                  | 0.86 (0.73–1.01)          | 0.06    | 0.88 (0.72–1.09)        | 0.25    |
| Atrial fibrillation or flutter     | 0.97 (0.83–1.13)          | 0.67    | 0.99 (0.81–1.21)        | 0.90    |
| Prior myocardial infarction        | 0.94 (0.78–1.13)          | 0.50    | 0.89 (0.71–1.13)        | 0.36    |
| Prior stroke                       | 1.73 (1.43–2.10)          | <0.001  | 1.57 (1.24–1.99)        | <0.001  |
| Chronic lung disease               | 1.11 (0.89–1.39)          | 0.37    | 1.16 (0.88–1.52)        | 0.29    |
| Dementia                           | 2.91 (2.44–3.47)          | <0.001  | 2.24 (1.78–2.82)        | <0.001  |
| Current smoking                    | 0.37 (0.27–0.51)          | <0.001  | 0.55 (0.38–0.81)        | 0.002   |
| Living alone                       | 1.05 (0.87–1.27)          | 0.62    | 1.14 (0.91–1.44)        | 0.26    |
| Ambulatory before admission        | 0.64 (0.54–0.77)          | <0.001  | 1.44 (1.13–1.84)        | 0.003   |
| Systolic BP <90 mmHg               | 2.01 (1.37–2.96)          | <0.001  | 1.17 (0.66–2.05)        | 0.59    |
| Heart rate <60 beat/min            | 1.07 (0.79–0.79)          | 0.66    | 1.03 (0.71–1.49)        | 0.88    |
| Body temperature ≥37.5 °C          | 2.26 (1.72–2.7)           | <0.001  | 1.89 (1.35–2.63)        | <0.001  |
| NYHA class III or IV               | 2.17 (1.62–2.91)          | <0.001  | 1.73 (1.24–2.41)        | 0.001   |
| LVEF <40%                          | 1.04 (0.89–1.22)          | 0.61    | 1.24 (1.00–1.52)        | 0.047   |
| Anaemia*                           | 1.67 (1.39–1.98)          | <0.001  | 1.08 (0.86–1.36)        | 0.51    |
| Albumin <3.0 g/dL                  | 2.30 (1.89–2.81)          | <0.001  | 1.91 (1.50–2.43)        | <0.001  |
| Sodium <135 mEq/L                  | 1.89 (1.53–2.33)          | <0.001  | 1.72 (1.34–2.22)        | <0.001  |
| eGFR <30 ml/min/1.73m <sup>2</sup> | 2.01 (1.70–2.36)          | <0.001  | 1.78 (1.45–2.19)        | <0.001  |

\*Defined by the World Health Organization criteria (haemoglobin <12 g/dL for women and <13 g/dL for men).

Abbreviations: OR, odds ratio; CI, confidence interval; BMI, body mass index; HF, heart failure; BP, blood pressure; NYHA, New York Heart Association; LVEF, left ventricular ejection; eGFR, estimated glomerular filtration rate;.

**eFigure 1. The details of functional decline during ADHF hospitalization.** Functional status at discharge according to functional status before admission is shown. ADHF, acute decompensated heart failure.

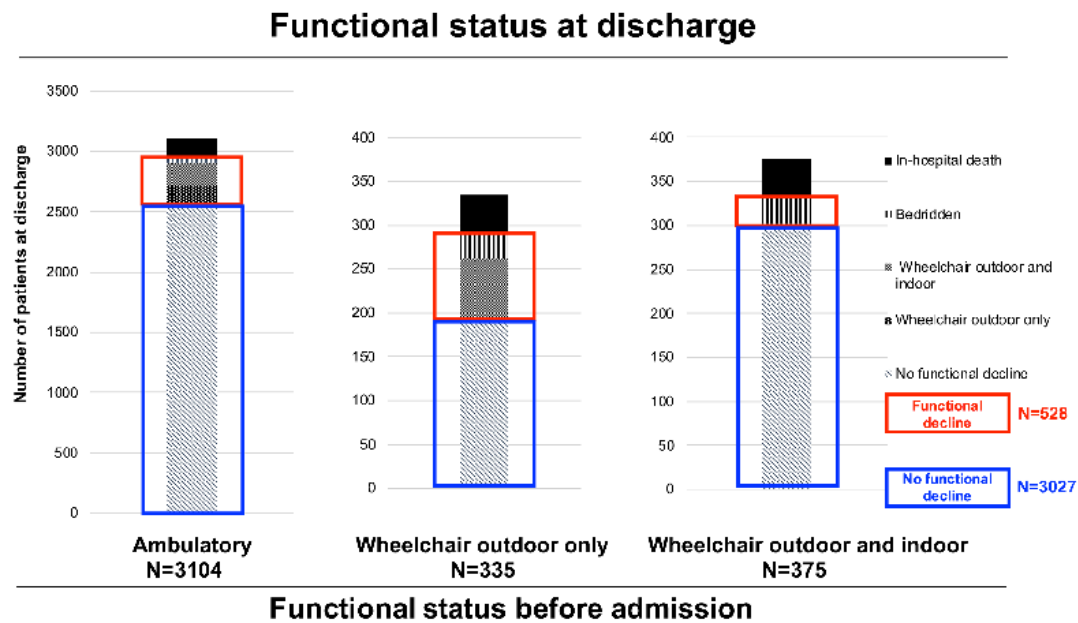

**eFigure 2. Subgroup analysis for the association of functional decline with no functional decline on the primary outcome measure. LVEF, left ventricular ejection fraction; HR, hazard ratio; CI, confidence interval.**

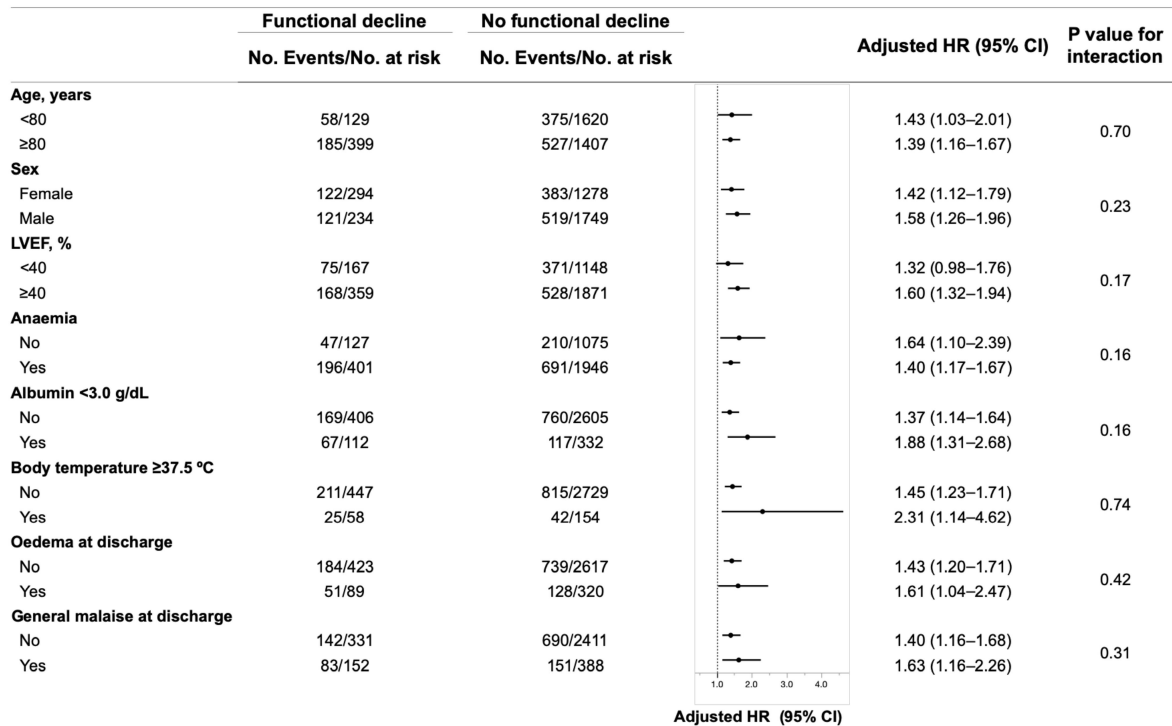

Supplement: bmjopen-2019-032674supp001.pdf [file bmjopen-2019-032674supp001.pdf]
