# Supplementary material for: Risk factors and clinical outcomes of functional decline during hospitalisation in very old patients with acute decompensated heart failure: an observational study
Source: PubMed Central journal article supplement — BMJ Open. 2020 Feb 16;10(2):e032674. doi: 10.1136/bmjopen-2019-032674 (PMC7044905; doi:10.1136/bmjopen-2019-032674), 2020-02-16
Supplement: bmjopen-2019-032674.draft_revisions.pdf [file bmjopen-2019-032674.draft_revisions.pdf]

# BMJ Open

BMJ Open is committed to open peer review. As part of this commitment we make the peer review history of every article we publish publicly available.

When an article is published we post the peer reviewers' comments and the authors' responses online. We also post the versions of the paper that were used during peer review. These are the versions that the peer review comments apply to.

The versions of the paper that follow are the versions that were submitted during the peer review process. They are not the versions of record or the final published versions. They should not be cited or distributed as the published version of this manuscript.

BMJ Open is an open access journal and the full, final, typeset and author-corrected version of record of the manuscript is available on our site with no access controls, subscription charges or pay-per-view fees (<http://bmjopen.bmj.com>).

If you have any questions on BMJ Open's open peer review process please email [info.bmjopen@bmj.com](mailto:info.bmjopen@bmj.com)

# BMJ Open

## Risk Factors and Clinical Outcomes of Functional Decline during Acute Decompensated Heart Failure Hospitalization: Observations from the KCHF Registry

|                               |                                                                                                                                                                                                                                                                                                                                                                                                                                                                                                                                                                                                                                                                                                                                                                                                                                                                                                                                                                                                                                                                                                                                                                                                                                                                                                                                                                                                                                                                                                                                                                                                                                                                            |
|-------------------------------|----------------------------------------------------------------------------------------------------------------------------------------------------------------------------------------------------------------------------------------------------------------------------------------------------------------------------------------------------------------------------------------------------------------------------------------------------------------------------------------------------------------------------------------------------------------------------------------------------------------------------------------------------------------------------------------------------------------------------------------------------------------------------------------------------------------------------------------------------------------------------------------------------------------------------------------------------------------------------------------------------------------------------------------------------------------------------------------------------------------------------------------------------------------------------------------------------------------------------------------------------------------------------------------------------------------------------------------------------------------------------------------------------------------------------------------------------------------------------------------------------------------------------------------------------------------------------------------------------------------------------------------------------------------------------|
| Journal:                      | <i>BMJ Open</i>                                                                                                                                                                                                                                                                                                                                                                                                                                                                                                                                                                                                                                                                                                                                                                                                                                                                                                                                                                                                                                                                                                                                                                                                                                                                                                                                                                                                                                                                                                                                                                                                                                                            |
| Manuscript ID                 | bmjopen-2019-032674                                                                                                                                                                                                                                                                                                                                                                                                                                                                                                                                                                                                                                                                                                                                                                                                                                                                                                                                                                                                                                                                                                                                                                                                                                                                                                                                                                                                                                                                                                                                                                                                                                                        |
| Article Type:                 | Research                                                                                                                                                                                                                                                                                                                                                                                                                                                                                                                                                                                                                                                                                                                                                                                                                                                                                                                                                                                                                                                                                                                                                                                                                                                                                                                                                                                                                                                                                                                                                                                                                                                                   |
| Date Submitted by the Author: | 03-Jul-2019                                                                                                                                                                                                                                                                                                                                                                                                                                                                                                                                                                                                                                                                                                                                                                                                                                                                                                                                                                                                                                                                                                                                                                                                                                                                                                                                                                                                                                                                                                                                                                                                                                                                |
| Complete List of Authors:     | <p>Yaku, Hidenori; Kyoto University Graduate School of Medicine Faculty of Medicine, Department of Cardiovascular Medicine<br/> Kato, Takao; Kyoto University Graduate School of Medicine Faculty of Medicine, Department of Cardiovascular Medicine; Kyoto University Graduate School of Medicine<br/> Morimoto, Takeshi; Hyogo Collge of Medicine, Division of General Internal Medicine<br/> Inuzuka, Yasutaka; Shiga Medical Center for Adults, Cardiology<br/> Tamaki, Yodo; Public Interest Incorporated Foundation Tenri Hospital, Cardiology<br/> Ozasa, Neiko; Kyoto University Graduate School of Medicine Faculty of Medicine, Department of Cardiovascular Medicine<br/> Yamamoto, Erika; Kyoto University Graduate School of Medicine Faculty of Medicine, Department of Cardiovascular Medicine<br/> Yoshikawa, Yusuke; Kyoto University Graduate School of Medicine Faculty of Medicine, Department of Cardiovascular Medicine<br/> Kitai, Takeshi; Kobe City Medical Center General Hospital, Cardiology<br/> Kato, Masashi; Mitsubishi Kyoto Hospital, Department of Cardiology<br/> Ikeda, Tomoyuki; Hikone Municipal Hospital, Department of Cardiology<br/> Furukawa, Yutaka; Kobe City Medical Center General Hospital, Department of Cardiovascular Medicine<br/> Nakagawa, Yoshihisa; Shiga University Graduate School of Medicine<br/> Sato, Yukihiro; Hyogo Prefectural Amagasaki Hospital<br/> Kuwahara, Koichiro ; Shinshu University Graduate School of Medicine School of Medicine, Cardiovascular Medicine<br/> Kimura, Takeshi; Kyoto University Graduate School of Medicine Faculty of Medicine, Department of Cardiovascular Medicine</p> |
| Keywords:                     | Heart failure < CARDIOLOGY, Adult cardiology < CARDIOLOGY, Cardiac Epidemiology < CARDIOLOGY                                                                                                                                                                                                                                                                                                                                                                                                                                                                                                                                                                                                                                                                                                                                                                                                                                                                                                                                                                                                                                                                                                                                                                                                                                                                                                                                                                                                                                                                                                                                                                               |
|                               |                                                                                                                                                                                                                                                                                                                                                                                                                                                                                                                                                                                                                                                                                                                                                                                                                                                                                                                                                                                                                                                                                                                                                                                                                                                                                                                                                                                                                                                                                                                                                                                                                                                                            |

SCHOLARONE™  
Manuscripts

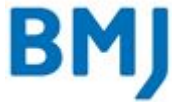

I, the Submitting Author has the right to grant and does grant on behalf of all authors of the Work (as defined in the below author licence), an exclusive licence and/or a non-exclusive licence for contributions from authors who are: i) UK Crown employees; ii) where BMJ has agreed a CC-BY licence shall apply, and/or iii) in accordance with the terms applicable for US Federal Government officers or employees acting as part of their official duties; on a worldwide, perpetual, irrevocable, royalty-free basis to BMJ Publishing Group Ltd ("BMJ") its licensees and where the relevant Journal is co-owned by BMJ to the co-owners of the Journal, to publish the Work in this journal and any other BMJ products and to exploit all rights, as set out in our [licence](#).

The Submitting Author accepts and understands that any supply made under these terms is made by BMJ to the Submitting Author unless you are acting as an employee on behalf of your employer or a postgraduate student of an affiliated institution which is paying any applicable article publishing charge ("APC") for Open Access articles. Where the Submitting Author wishes to make the Work available on an Open Access basis (and intends to pay the relevant APC), the terms of reuse of such Open Access shall be governed by a Creative Commons licence – details of these licences and which [Creative Commons](#) licence will apply to this Work are set out in our licence referred to above.

Other than as permitted in any relevant BMJ Author's Self Archiving Policies, I confirm this Work has not been accepted for publication elsewhere, is not being considered for publication elsewhere and does not duplicate material already published. I confirm all authors consent to publication of this Work and authorise the granting of this licence.

## Risk Factors and Clinical Outcomes of Functional Decline during Acute

### Decompensated Heart Failure Hospitalization: Observations from the KCHF Registry

**Authors:** Hidenori Yaku, MD <sup>a</sup>, Takao Kato, MD <sup>a</sup>, Takeshi Morimoto, MD, MPH <sup>b</sup>, Yasutaka Inuzuka, MD <sup>c</sup>, Yodo Tamaki, MD <sup>d</sup>, Neiko Ozasa, MD <sup>a</sup>, Erika Yamamoto, MD <sup>a</sup>, Yusuke Yoshikawa, MD <sup>a</sup>, Takeshi Kitai, MD <sup>e</sup>, Masashi Kato, MD <sup>f</sup>, Tomoyuki Ikeda <sup>g</sup>, Yutaka Furukawa, MD <sup>e</sup>, Yoshihisa Nakagawa, MD <sup>h</sup>, Yukihito Sato, MD <sup>i</sup>, Koichiro Kuwahara, MD <sup>j</sup>, Takeshi Kimura, MD <sup>a</sup>, for the KCHF study investigators

**Affiliations:** <sup>a</sup> Department of Cardiovascular Medicine, Kyoto University Graduate School of Medicine, Kyoto, Japan; <sup>b</sup> Department of Clinical Epidemiology, Hyogo College of Medicine, Hyogo, Japan; <sup>c</sup> Department of Cardiovascular Medicine, Shiga General Hospital, Shiga, Japan; <sup>d</sup> Division of Cardiology, Tenri Hospital, Nara, Japan; <sup>e</sup> Department of Cardiovascular Medicine, Kobe City Medical Center General Hospital, Hyogo, Japan; <sup>f</sup> Department of Cardiology, Mitsubishi Kyoto Hospital, Kyoto, Japan; <sup>g</sup> Department of Cardiology, Hikone Municipal Hospital, Shiga, Japan; <sup>h</sup> Department of Cardiovascular Medicine, Shiga University Graduate School of Medicine, Shiga, Japan; <sup>i</sup> Department of Cardiology, Hyogo Prefectural Amagasaki General Medical Center, Hyogo, Japan; <sup>j</sup> Department of Cardiovascular Medicine, Shinshu University Graduate School of Medicine,



1  
2  
3  
4 Nagano, Japan.  
5  
6  
7

8  
9 **Corresponding Author:** Takao Kato, MD.

10 Department of Cardiovascular Medicine, Kyoto University Graduate School of Medicine

11  
12  
13 54 Shogoin Kawahara-cho, Sakyo-ku, Kyoto. 606-8507 Japan  
14

15  
16  
17 Tel: +81-75-751-4254; FAX: +81-75-751-3289; E-mail: [tkato75@kuhp.kyoto-u.ac.jp](mailto:tkato75@kuhp.kyoto-u.ac.jp)  
18  
19

20  
21  
22 **Manuscript word count:** 2793 words  
23  
24  
25  
26  
27  
28  
29  
30  
31  
32  
33  
34  
35  
36  
37  
38  
39  
40  
41  
42  
43  
44  
45  
46  
47  
48  
49  
50  
51  
52  
53  
54  
55  
56  
57  
58  
59  
60

## Abstract

**Objective:** To investigate the prevalence and risk factors of functional decline during hospitalization, and its relationship with post-discharge outcomes in patients with acute decompensated heart failure (ADHF) hospitalization.

**Design:** Prospective cohort study between October 1, 2014, and March 31, 2016.

**Setting:** A physician-initiated multicentre study of consecutive patients admitted for ADHF into 1 of 19 secondary and tertiary hospitals throughout Japan.

**Participants:** Among 3555 patients hospitalized for ADHF (median age [IQR], 80 [71-86] years; 1572 [44%] women), functional decline during the index hospitalization occurred in 528 patients (15%).

**Primary and secondary outcomes:** The primary outcome measure was a composite of all-cause death or heart failure hospitalization after discharge. The secondary outcome measures were all-cause death and heart failure hospitalization.

**Results:** The independent risk factors for functional decline included age  $\geq 80$  years (OR 2.56; 95% CI 1.98–3.32), women (OR 1.27; 95% CI 1.01–1.60), prior stroke (OR 1.61; 95% CI 1.23–2.10), dementia (OR 1.95; 95% CI 1.52–2.52), elevated body temperature (OR 1.88; 95% CI 1.29–2.74), hyponatremia (OR 1.46; 95% CI 1.07–1.98), decreased albumin levels

1  
2  
3  
4 (OR 1.69; 95% CI 1.27–2.24), renal dysfunction (OR 1.54; 95% CI 1.21–1.96), and New  
5  
6  
7 York Heart Association class III/IV on admission (OR 1.51; 95% CI 1.05–2.18) after  
8  
9  
10 multivariable adjustment. The cumulative 1-year incidence of the primary outcome in the  
11  
12  
13 functional decline group was significantly higher than that in the no functional decline group  
14  
15  
16  
17 (50% vs. 31%, log-rank  $P < 0.001$ ). After adjusting for baseline characteristics, the higher risk  
18  
19  
20 of the functional decline group relative to the no functional decline group remained  
21  
22  
23  
24 significant (adjusted HR 1.50; 95% CI 1.29–1.75;  $P < 0.001$ ).

25  
26  
27 **Conclusions:** Independent risk factors of functional decline in ADHF patients were related to  
28  
29  
30 both frailty and severity of heart failure. Functional decline during hospitalization was  
31  
32  
33 associated with unfavourable post-discharge outcomes.  
34  
35

36  
37 **Trial Registration:** <https://clinicaltrials.gov/ct2/show/NCT02334891> (NCT02334891) and  
38  
39  
40 [https://upload.umin.ac.jp/cgi-open-bin/ctr\\_e/ctr\\_view.cgi?recptno=R000017241](https://upload.umin.ac.jp/cgi-open-bin/ctr_e/ctr_view.cgi?recptno=R000017241)  
41  
42  
43  
44 (UMIN000015238)  
45  
46  
47  
48  
49  
50  
51  
52  
53  
54  
55  
56  
57  
58  
59  
60

### Strengths and limitations of this study

- This study is the first large-scale contemporary multicentre study reporting the prevalence of functional decline in patients hospitalized for acute decompensated heart failure (ADHF).
- Functional decline during hospitalization occurred in 15% of patients, and 80% of those with functional decline were ambulatory before admission
- The severity of symptoms or patient status specific for heart failure was associated with functional decline independent of well-known factors in acute medical illness.
- Functional decline during ADHF hospitalization was statistically significantly associated with a higher risk for the primary composite outcome of mortality or heart failure readmission.
- We did not collect data regarding on-site and outpatient rehabilitation and nutritional support.

## Introduction

Functional decline in hospitalized patients is a complex and dynamic process [1–3]. Functional decline during hospitalization was reported to occur in approximately 30-50% of patients hospitalized for acute medical illness [2,4,5]. In the rapidly aging societies, the number of patients hospitalized for acute decompensated heart failure (ADHF) is increasing, and ADHF has become the leading cause of hospitalization due to acute medical illness. In older patients, functional decline associated with hospitalization often leads to subsequent inability to live actively and independently.

However, there is a scarcity of data regarding the risk factors of functional decline in patients hospitalized for ADHF. Identifying high-risk patients for functional decline during hospitalization would be useful for its prevention. Furthermore, no previous study focused on subsequent clinical outcomes in patients with functional decline during hospitalization.

Therefore, we sought to clarify the risk factors for functional decline during hospitalization in patients with ADHF and to compare the 1-year clinical outcomes between the 2 groups of patients with and without functional decline during the hospitalization for ADHF in a large Japanese observational database of hospitalized patients for ADHF in the real-world clinical practice.

## Methods

### Study Design, Setting, and Population

The Kyoto Congestive Heart Failure (KCHF) registry is a physician-initiated, prospective, observational, multicentre cohort study that enrolled consecutive patients who were hospitalized for ADHF for the first time between October 1, 2014, and March 31, 2016. These patients were admitted into 19 secondary and tertiary hospitals, including rural and urban as well as large and small institutions, throughout Japan. The study protocol was approved by the institutional review board of each participating hospital. A waiver of written informed consent from each patient was granted by the institutional review boards of Kyoto University and each participating centre because the study met the conditions of the Japanese ethical guidelines for epidemiological study and the US policy for protecting human research participants.[6,7] This study followed the Strengthening the Reporting of Observational Studies in Epidemiology (STROBE) reporting guideline.

The details of the KCHF study design and patient enrolment are described elsewhere.[8,9] Briefly, we enrolled all patients with ADHF, as defined by the modified Framingham criteria, who were admitted to the participating hospitals and patients who underwent heart failure-specific treatment involving intravenous drugs within 24 hours after

1  
2  
3  
4 hospital presentation. Patient records were anonymized before analysis. Data analysis was  
5  
6  
7  
8 conducted from August 2018 to October 2018.  
9

10  
11           Among 4056 patients enrolled in the KCHF registry, 3785 patients were discharged  
12  
13  
14 alive after hospitalization for ADHF. Clinical follow-up data were collected in October 2017.

15  
16  
17 The attending physicians or research assistants at each participating hospital collected clinical  
18  
19  
20  
21 events after the index hospitalization from hospital charts or by contacting patients, their  
22  
23  
24 relatives, or their referring physicians with consent. The present analysis had 2 objectives.

25  
26  
27 First, we sought to clarify the risk factors for functional decline during hospitalization of  
28  
29  
30  
31 ADHF patients. Second, we sought to compare the 1-year clinical outcomes between the 2  
32  
33  
34 groups of patients with and without functional decline during the hospitalization for ADHF.  
35

36  
37 Among 4056 patients enrolled in the KCHF registry, the current study population consisted  
38  
39  
40  
41 of 3555 patients who were discharged alive and were assessed for functional decline during  
42  
43  
44 hospitalization, excluding 271 patients who died during the index hospitalization, 99 patients  
45  
46  
47 whose functional status before admission and/or at discharge was not available, and 131  
48  
49  
50  
51 patients who were bedridden before index hospitalization (Figure 1). The long-term  
52  
53  
54 follow-up was censored at 1-year. The primary outcome measure in the current analysis was  
55  
56  
57 a composite of all-cause death or heart failure hospitalization at 1-year. The secondary  
58  
59  
60

1  
2  
3  
4 outcome measures were all-cause death and heart failure hospitalization.  
5  
6

## 7 **Definitions**

8  
9  
10 Physical activity before admission and at discharge was classified by mobility  
11  
12 status based on the definition of Japanese long-term care insurance into ambulatory  
13  
14 (including those patients using any aid such as stick), use of wheelchair outdoor only, use of  
15  
16 wheelchair indoor and outdoor, and bedridden state [8]. Functional decline was defined as the  
17  
18 decline of at least one stage on physical activity at discharge compared with pre-admission  
19  
20 status. In-hospital worsening heart failure was defined as additional intravenous drug  
21  
22 administration for heart failure, haemodialysis, or mechanical circulatory or respiratory  
23  
24 support, occurring >24 hours after therapy initiation [10]. In-hospital worsening renal  
25  
26 function was defined as >0.3 mg/dL increase in serum creatinine levels during the index  
27  
28 hospitalization [11–13]. Detailed definitions of baseline clinical characteristics including the  
29  
30 signs and symptoms of heart failure were described previously [9].  
31  
32  
33  
34  
35  
36  
37  
38  
39  
40  
41  
42  
43  
44  
45  
46

## 47 **Statistical Analysis**

48  
49  
50 Categorical variables were presented as numbers with percentages and compared  
51  
52 using  $\chi^2$  test. Continuous variables were expressed as the mean with standard deviation or  
53  
54 median with 25th to 75th percentiles, and compared using the Student's *t* test when normally  
55  
56  
57  
58  
59  
60



1  
2  
3  
4 distributed or Wilcoxon rank-sum test when not normally distributed.  
5  
6

7  
8 We compared baseline characteristics and clinical outcomes based on the presence  
9  
10 or absence of functional decline during the index hospitalization. A multivariable logistic  
11  
12 regression model was developed to identify clinical characteristics associated with an  
13  
14 increased risk for functional decline. We used 23 clinically relevant factors listed in Table 1  
15  
16 as potential independent risk factors in the multivariable logistic regression model and  
17  
18 estimated the odd ratios (ORs) and 95% confidence intervals (CIs). We used the  
19  
20 Kaplan-Meier method to estimate the cumulative 1-year incidences of the outcome measures  
21  
22 and assessed the differences with the log-rank test. We expressed the associations of the  
23  
24 functional decline group with the no functional decline group for all outcome measures as  
25  
26 hazard ratios (HRs) with 95% CIs by multivariable Cox proportional hazard models  
27  
28 incorporating the 23 clinically relevant risk-adjusting variables indicated in Table 1. We also  
29  
30 conducted subgroup analyses stratified by age, sex, LVEF, anaemia, albumin levels, body  
31  
32 temperature, and the symptomatic status at discharge (oedema and general malaise at  
33  
34 discharge). In the multivariable analysis and subgroup analyses, continuous variables were  
35  
36 dichotomized by clinically meaningful reference values or median values; age  $\geq 80$  years  
37  
38 based on the median value, LVEF  $< 40\%$  based on the heart failure guideline of LVEF  
39  
40  
41  
42  
43  
44  
45  
46  
47  
48  
49  
50  
51  
52  
53  
54  
55  
56  
57  
58  
59  
60

1  
2  
3  
4 classification [14], BMI  $\leq 22$  kg/m<sup>2</sup>, renal dysfunction (eGFR  $< 30$  ml/min/1.73m<sup>2</sup>) based on  
5  
6  
7  
8 CKD grade, decreased albumin levels (serum albumin  $< 3.0$  g/dL), hyponatremia (serum  
9  
10  
11 sodium  $< 135$  mEq/L), elevated body temperature (body temperature  $\geq 37.5^{\circ}\text{C}$ ) based on the  
12  
13  
14 cut-off value in metabolic syndrome [15].  
15  
16

17  
18 We performed an additional analysis using the data including those patients who  
19  
20  
21 died during the index hospitalization and those who were bedridden before the index  
22  
23  
24 hospitalization, and evaluated the factors associated with functional decline or in-hospital  
25  
26  
27 mortality by constructing multivariable adjusted Cox models. All statistical analyses were  
28  
29  
30 conducted by a physician (H.Y.) and a statistician (T.M.) with JMP 13.0 or SAS 9.4 (both  
31  
32  
33  
34 SAS Institute Inc, Cary, NC). Two-tailed P-values less than 0.05 were considered statistically  
35  
36  
37 significant.  
38  
39

#### 40 41 **Patient and public involvement**

42  
43  
44 No patient involved.  
45  
46  
47  
48  
49  
50

#### 51 **Results**

##### 52 53 54 **Baseline Clinical Characteristics**

55  
56  
57 Among 3555 study patients, physical activity before admission included  
58  
59  
60

1  
2  
3  
4 ambulatory in 2949 patients (83%), wheelchair outdoor only in 272 patients (7.7%), and  
5  
6  
7 wheelchair outdoor and indoor in 334 patients (9.4%). At hospital discharge, functional  
8  
9  
10 decline was observed in 420 patients (14%) who were ambulatory before admission, in 80  
11  
12  
13 patients (29%) who had used wheelchair outdoor only, and in 28 patients (8.4%) who had  
14  
15  
16 used wheelchair outdoor and indoor. Consequently, decline in functional status was observed  
17  
18  
19 in 528 patients (15%; functional decline group), while functional decline was not observed in  
20  
21  
22 3027 patients (85%; no functional decline group) (eFigure 1). Wheelchair outdoor only  
23  
24  
25 before admission were more prevalent in the functional decline group than in the no  
26  
27  
28 functional decline group; however, 80% of patients in the functional decline group were  
29  
30  
31 ambulatory before admission (Table 1).  
32  
33  
34  
35  
36  
37

38           Regarding the baseline clinical characteristics, the patients in the functional decline  
39  
40 group were older and had a higher prevalence of hypertension, prior stroke, renal  
41  
42 dysfunction, dementia, malignancy, anaemia, decreased albumin levels, and hyponatremia  
43  
44 (Table 1). There were no significant differences in previous heart failure hospitalization,  
45  
46  
47 atrial fibrillation or flutter, previous myocardial infarction, chronic lung disease, and living  
48  
49  
50 alone status as a social background between the 2 groups (Table 1). The functional decline  
51  
52  
53 group was more likely to have a valvular aetiology, lower blood pressure, lower heart rate,  
54  
55  
56  
57  
58  
59  
60

1  
2  
3  
4 higher levels of brain natriuretic peptide (BNP) or N-terminal portion of proBNP  
5  
6  
7 (NT-proBNP), and a higher LVEF (Table 1). The proportion of patients who achieved relief  
8  
9  
10 of signs and symptoms on admission after the treatment in the emergency room was not  
11  
12  
13 significantly different between the 2 groups (14% vs. 16%, P=0.25).  
14  
15  
16

### 17 **Risk Factors for Functional Decline**

18  
19  
20 Among the baseline characteristics and status at hospital presentation, the following  
21  
22 independent risk factors for functional decline during hospitalization were identified by the  
23  
24 multivariable logistic regression analysis: age  $\geq 80$  years (OR 2.56; 95% CI 1.98–3.32),  
25  
26 women (OR 1.27; 95% CI 1.01–1.60), prior stroke (OR 1.61; 95% CI 1.23–2.10), dementia  
27  
28 (OR 1.95; 95% CI 1.52–2.52), body temperature  $\geq 37.5^{\circ}\text{C}$  (OR 1.88; 95% CI 1.29–2.74),  
29  
30 hyponatremia (OR 1.46; 95% CI 1.07–1.98), decreased albumin levels (OR 1.69; 95% CI  
31  
32 1.27–2.24), eGFR  $< 30$  ml/min/1.73m<sup>2</sup> (OR 1.54; 95% CI 1.21–1.96), and New York Heart  
33  
34 Association (NYHA) class III/IV on admission (OR 1.51; 95% CI 1.05–2.18) (Figure 2 and  
35  
36 eTable 1).  
37  
38  
39  
40  
41  
42  
43  
44  
45  
46  
47  
48  
49

### 50 **In-hospital adverse events and status at discharge**

51  
52 The median length of hospital stay was longer in the functional decline group than  
53  
54 in the no functional decline group (21 days vs. 15 days, P <0.001). Regarding the in-hospital  
55  
56  
57  
58  
59  
60

1  
2  
3  
4 adverse events, the prevalence of worsening heart failure, worsening renal function, and  
5  
6  
7 stroke was higher in the functional decline group than in the no functional decline group  
8  
9  
10 (Table 2). The proportion of patients with symptoms such as dyspnoea on exertion, oedema,  
11  
12  
13 general malaise, and loss of appetite at discharge was higher in the functional decline group  
14  
15  
16 than in the no functional decline group (Table 2). Consequently, the proportion of patients in  
17  
18  
19 the functional decline group discharged to home was also lower (47% vs. 90%,  $P < 0.001$ ).  
20  
21  
22  
23  
24 Regarding medical treatment at discharge, angiotensin-converting enzyme inhibitor or  
25  
26  
27 angiotensin receptor blocker (ACEI/ARB), and beta blocker were less often prescribed in the  
28  
29  
30 functional decline group than in the no functional decline group (Table 2).  
31  
32  
33

### 34 **Long-term outcomes: functional decline vs. no functional decline groups**

35  
36  
37 Follow-up rate at 1-year was 96%. The cumulative 1-year incidence of the primary  
38  
39  
40 outcome measure (a composite of all-cause death or heart failure hospitalization) in the  
41  
42  
43 functional decline group was significantly higher than that in the no functional decline group  
44  
45  
46 (50% vs. 31%, log-rank  $P < 0.001$ ) (Figure 3). After adjusting for baseline characteristics, the  
47  
48  
49 higher risk of the functional decline group relative to the no functional decline group  
50  
51  
52 remained significant (adjusted HR, 1.50; 95%CI, 1.29–1.75;  $P < 0.001$ ) (Figure 3 and eTable  
53  
54  
55  
56  
57 2). The cumulative 1-year incidence of all-cause death was also significantly higher in the  
58  
59  
60

1  
2  
3  
4 functional decline group than in the no functional decline group. Even after adjusting  
5  
6  
7  
8 confounders, the excess mortality risk of the functional decline group relative to the no  
9  
10  
11 functional decline group remained significant (Figure 3 and eTable 2). The cumulative 1-year  
12  
13  
14 incidence of heart failure hospitalization was also significantly higher in the functional  
15  
16  
17 decline group than in the no functional decline group. However, the adjusted risk of the  
18  
19  
20 functional decline group relative to the no functional decline group for heart failure  
21  
22  
23 hospitalization was no longer significant (Figure 3 and eTable 2). In the subgroup analyses,  
24  
25  
26 there were no interactions between those subgroup factors and the association of functional  
27  
28  
29 decline with the primary outcome measure (eFigure 2).  
30  
31  
32  
33

#### 34 **Additional analysis on the risk factors for functional decline or in-hospital mortality**

35  
36  
37 The risk factors for functional decline or in-hospital mortality in a total of 4056  
38  
39  
40 patients were similar to the risk factors for functional decline. LVEF <40% (OR, 1.23; 95%  
41  
42  
43 CI, 1.00–1.52) and acute coronary syndrome (OR, 1.73; 95% CI, 1.17–2.56) that were not  
44  
45  
46 included in the risk factors for functional decline emerged as the risk factors for functional  
47  
48  
49 decline or in-hospital mortality. Meanwhile, among the risk factors for functional decline,  
50  
51  
52 women (OR, 1.10; 95% CI, 0.90–1.34) was not included in the risk factors for functional  
53  
54  
55 decline or in-hospital mortality (Figure 2 and eTable 1).  
56  
57  
58  
59  
60

## Discussion

The main findings of the present study investigating the prevalence and risk factors of functional decline during hospitalization, and its relationship with post-discharge outcomes in patients with ADHF hospitalization were as follows; 1) Functional decline during hospitalization occurred in 15% of patients, and 80% of those with functional decline were ambulatory before admission; 2) The independent baseline risk factors associated with functional decline included age  $\geq 80$  years, women, prior stroke, dementia, body temperature  $\geq 37.5^{\circ}\text{C}$ , hyponatremia, decreased albumin levels, eGFR  $< 30$  ml/min/1.73m<sup>2</sup>, and NYHA class III/IV; 3) Functional decline during the index hospitalization was associated with higher long-term risk for a composite of all-cause death or heart failure hospitalization.

This is the first large-scale contemporary multicentre study reporting the prevalence of functional decline in patients hospitalized for ADHF. Of note, we identified the severity of symptoms or patient status specific for heart failure was associated with functional decline independent of well-known factors in acute medical illness [16–18]. Functional decline is an inevitable consequence in aged people, but hospitalization accelerates the decline [18–20]. Functional declines have been found to be related not only to impairment of

1  
2  
3  
4 independence and quality of life (QOL), but also to increased health service use, higher risk  
5  
6  
7 for institutionalization, and higher risk for mortality [21–25]. Indeed, in the present study, the  
8  
9  
10 proportion of patients discharged to home was lower in the functional decline group than in  
11  
12  
13 the no functional decline group, suggesting impaired QOL after discharge. Also, the  
14  
15  
16 long-term mortality was worse in the functional decline group than in the no functional  
17  
18  
19 decline group. Therefore, it is important to recognize risk factors of functional decline. In  
20  
21  
22 previous studies of hospitalized patients with acute medical illness, the predictors of  
23  
24  
25 functional decline in hospitalized elderly patients were older age, admission diagnosis, lower  
26  
27  
28 functional status, impaired cognitive status, comorbidities, and length of hospital stay [16–  
29  
30  
31 18]. These findings were confirmed in the setting of ADHF in our present study. In addition,  
32  
33  
34 findings specific for ADHF such as the dyspnoea or hyponatremia was associated with  
35  
36  
37 functional decline, which were also reported to be the risk factors for in-hospital mortality in  
38  
39  
40 ADHF [26]. The prevalence of dyspnoea, oedema, general malaise and loss of appetite at  
41  
42  
43 discharge was higher in the functional decline group. Early achievement of successful ADHF  
44  
45  
46 treatment might reduce the risk of functional decline, although the present observational  
47  
48  
49 study could not address the cause-effect relationship between the functional decline and the  
50  
51  
52 symptomatic status at discharge.  
53  
54  
55  
56  
57  
58  
59  
60



1  
2  
3  
4                   There might be several possible strategies to prevent functional decline during  
5  
6  
7  
8                   ADHF hospitalization. The first is the early improvement of hemodynamic status to avoid  
9  
10  
11                   worsening heart failure. The prevalence of worsening heart failure was higher in the  
12  
13  
14                   functional decline group. As functional decline associated with hospitalization begins within  
15  
16  
17                   48 hours of admission, early improvement of heart failure to reduce the incidence of  
18  
19  
20                   hospitalization-associated disability is one of the main goals of care [26]. Second, it would be  
21  
22  
23                   important to be adequately aware high-risk patients to make aggressive intervention for  
24  
25  
26                   preventing functional decline. We identified the risk factors among the baseline  
27  
28  
29                   characteristics in ADHF patients. In addition, the adverse events during hospitalization may  
30  
31  
32                   be tightly related to the functional decline. Stroke is one of causes of functional decline and  
33  
34  
35                   observed in 5.1% of patients with functional decline. Third, a strategy for the prevention of  
36  
37  
38                   functional decline might be the seamless rehabilitation and comprehensive geriatric  
39  
40  
41                   management through a multidisciplinary team approach [27–30]. In addition, the subgroup  
42  
43  
44                   analysis showed that there were no interactions between those subgroup factors and the  
45  
46  
47                   association of functional decline with the primary outcome measure. Thus, prevention of  
48  
49  
50                   functional decline would have an impact on improving outcomes in all of the patients with  
51  
52  
53                   ADHF.  
54  
55  
56  
57  
58  
59  
60

1  
2  
3  
4 This study has several limitations. First, we did not collect information on activity  
5  
6  
7 of daily living index. Instead, we adopted easy and simple classification of functional status  
8  
9  
10 as ambulatory, use of wheelchair outdoor only, use of wheelchair indoor and outdoor, and  
11  
12  
13 bedridden state. Second, we did not collect data regarding on-site and outpatient  
14  
15  
16 rehabilitation and nutritional support. However, a team-based approach for heart failure  
17  
18 patients was adapted in all the participating centres in the present study. Third, we did not  
19  
20  
21 include the status at discharge or adverse in-hospital events in the analysis for the risk factor  
22  
23  
24 for functional decline, because the cause-effect relationship was not clear. Fourth, data on  
25  
26  
27 post-discharge medication and change of functional status after discharge from the index  
28  
29  
30 hospitalization were not collected, and not analysed in the analysis for the long-term  
31  
32  
33 outcomes. Fifth, as with any observational study, the possibility of selection bias and residual  
34  
35  
36 confounding cannot be excluded, although we adjusted for 23 variables as most conceivable  
37  
38  
39 confounders.  
40  
41  
42  
43  
44  
45  
46

## 47 **Conclusions**

48  
49  
50  
51 Independent risk factors of functional decline in ADHF patients were related to  
52  
53  
54 both frailty and severity of heart failure. Functional decline during ADHF hospitalization was  
55  
56  
57 associated with unfavourable post-discharge outcomes.  
58  
59  
60

## Acknowledgment

H.Yaku and T.Kato had full access to all the data in the study and takes responsibility for the integrity of the data and the accuracy of the data analysis.

We gratefully acknowledge the contributions from KCHF study investigators (Hidenori Yaku, MD; Takao Kato, MD; Neiko Ozasa, MD; Erika Yamamoto, MD; Yusuke Yoshikawa, MD; Tetsuo Shioi, MD; Koichiro Kuwahara, MD; Takeshi Kimura, MD, at Kyoto University Hospital, Kyoto, Japan, Moritake Iguchi, MD; Yugo Yamashita, MD, Masaharu Akao, MD, at National Hospital Organization Kyoto Medical Center, Kyoto, Japan, Masashi Kato, MD; Shinji Miki, MD, at Mitsubishi Kyoto Hospital, Kyoto, Japan, Mamoru Takahashi, MD, at Shimabara Hospital, Kyoto, Japan, Tsuneaki Kawashima, MD; Takafumi Yagi, MD, at Daini Okamoto General Hospital, Toshikazu Jinnai, MD; Takashi Konishi, MD, at Japanese Red Cross Otsu Hospital, Otsu, Japan, Yasutaka Inuzuka, MD; Shigeru Ikeguchi, MD, at Shiga General Hospital, Moriyama, Japan, Tomoyuki Ikeda, MD; Yoshihiro Himura, MD, at Hikone Municipal Hospital, Hikone, Japan, Kazuya Nagao, MD; Tsukasa Inada, MD, at Osaka Red Cross Hospital, Osaka, Japan, Kenichi Sasaki, MD; Moriaki Inoko, MD, at Kitano Hospital, Osaka, Japan, Takafumi Kawai, MD; Tomoki Sasa, MD; Mitsuo Matsuda, MD, at Kishiwada City Hospital, Kishiwada, Japan, Akihiro Komasa, MD; Katsuhisa Ishii, MD, at

1  
2  
3  
4 Kansai Electric Power Hospital, Osaka, Japan, Yodo Tamaki, MD; Yoshihisa Nakagawa,  
5  
6  
7 MD, at Tenri Hospital, Tenri, Japan, Ryoji Taniguchi, MD; Yukihito Sato, MD; Yoshiki  
8  
9  
10 Takatsu, MD, at Hyogo Prefectural Amagasaki General Medical Center, Amagasaki, Japan,  
11  
12  
13 Takeshi Kitai, MD; Ryousuke Murai, MD; Yutaka Furukawa, MD, at Kobe City Medical  
14  
15  
16  
17 Center General Hospital, Kobe, Japan, Mitsunori Kawato, MD, at Kobe City Nishi-Kobe  
18  
19  
20 Medical Center, Kobe, Japan, Yasuyo Motohashi, MD; Kanae Su, MD; Mamoru Toyofuku,  
21  
22  
23  
24 MD; Takashi Tamura, MD, at Japanese Red Cross Wakayama Medical Center, Wakayama,  
25  
26  
27 Japan, Reiko Hozo, MD; Ryusuke Nishikawa, MD; Hiroki Sakamoto, MD, at Shizuoka  
28  
29  
30 General Hospital, Shizuoka, Japan, Yuichi Kawase, MD; Keiichiro Iwasaki, MD; Kazushige  
31  
32  
33  
34 Kadota, MD, at Kurashiki Central Hospital, Kurashiki, Japan, and Takashi Morinaga, MD;  
35  
36  
37  
38 Yohei Kobayashi, MD; Kenji Ando, MD, at Kokura Memorial Hospital, Kokura, Japan.).  
39  
40  
41  
42  
43

#### 44 **Sources of Funding**

45  
46  
47 This study is supported by a grant from the Japan Agency for Medical Research and  
48  
49  
50 Development (18059186) to T.K., K.K., N.O.. The founder had no role in the study design,  
51  
52  
53  
54 collection, analysis or interpretation of the data, writing the manuscript, or the decision to  
55  
56  
57  
58 submit the paper for publication.  
59  
60

**Disclosures**

None

**Affiliations**

From Kyoto University Graduate School of Medicine, Kyoto, Japan (H.Y., T.Kato, N.O., E.Y., Y.Y., S.S., K.O., T.Kimura); Hyogo College of Medicine, Nishinomiya, Japan (T.M.); Shiga General Hospital, Moriyama, Japan (Y.I.); Tenri Hospital, Tenri, Japan (Y.T., Y.N.); Kobe City Medical Center General Hospital, Kobe, Japan (T.K., Y.F.); Hyogo Prefectural Amagasaki General Medical Center, Amagasaki, Japan (R.Y., Y.S.); National Hospital Organization Kyoto Medical Center, Kyoto, Japan (M.I.); Mitsubishi Kyoto Hospital, Kyoto, Japan (K.M.); Japanese Red Cross Otsu Hospital, Otsu, Japan (T.J.); Hikone Municipal Hospital, Hikone, Japan (T.I.); Japanese Red Cross Osaka Hospital, Osaka, Japan (K.N.); Kishiwada City Hospital, Kishiwada, Japan (T.K.); Kansai Electric Power Hospital, Osaka, Japan (A.K.); Shizuoka General Hospital, Shizuoka, Japan (R.N.); Kurashiki Central Hospital, Kurashiki, Japan (Y.K., K.K.); Kokura Memorial Hospital, Kitakyushu, Japan (T. M., K.A.); Kitano Hospital, Osaka, Japan (Y.S.); Japanese Red Cross Wakayama Medical Center, Wakayama, Japan (M.T.); Shinshu University Graduate School of Medicine, Matsumoto, Japan (K.K.) .

1  
2  
3  
4  
5  
6  
7  
8  
9  
10  
11  
12  
13  
14  
15  
16  
17  
18  
19  
20  
21  
22  
23  
24  
25  
26  
27  
28  
29  
30  
31  
32  
33  
34  
35  
36  
37  
38  
39  
40  
41  
42  
43  
44  
45  
46  
47  
48  
49  
50  
51  
52  
53  
54  
55  
56  
57  
58  
59  
60

For peer review only

## References

- 1 Manton KG. A longitudinal study of functional change and mortality in the United States. *J Gerontol* 1988;**43**:S153-61.
- 2 Boyd CM, Ricks M, Fried LP, *et al.* Functional decline and recovery of activities of daily living in hospitalized, disabled older women: the Women's Health and Aging Study I. *J Am Geriatr Soc* 2009;**57**:1757–66. doi:10.1111/j.1532-5415.2009.02455.x
- 3 Guralnik JM, Alexih L, Branch LG. Medical and Long-Term Care Costs When Older Persons Become More Dependent Intentional Weight Loss and 13-Year Diabetes Incidence in Overweight Adults. *Am J Public Health* 2002;**92**:1244–5.
- 4 Gill TM, Allore HG, Holford TR, *et al.* Hospitalization, restricted activity, and the development of disability among older persons. *J Am Med Assoc* 2004;**292**:2115–24. doi:10.1001/jama.292.17.2115
- 5 Sager MA, Franke T, Inouye SK, *et al.* Functional outcomes of acute medical illness and hospitalization in older persons. *Arch Intern Med* 1996;**156**:645–52.
- 6 Japan's ethical guidelines for epidemiologic research. 2008;**2002**.[http://www.lifescience.mext.go.jp/files/pdf/n796\\_01.pdf](http://www.lifescience.mext.go.jp/files/pdf/n796_01.pdf)
- 7 45 Code of Federal Regulations 46.116(d). 2009;:4–

- 1  
2  
3  
4 5. <https://www.hhs.gov/ohrp/regulations-and-policy/regulations/45-cfr-46/index.html#4>  
5  
6  
7  
8 6.116  
9  
10  
11 8 Yamamoto E, Kato T, Ozasa N, *et al.* Kyoto Congestive Heart Failure (KCHF) study:  
12  
13 rationale and design. *ESC Hear Fail* 2017;**4**:216–23. doi:10.1002/ehf2.12138  
14  
15  
16  
17 9 Yaku H, Ozasa N, Morimoto T, *et al.* Demographics, Management, and In-Hospital  
18  
19 Outcome of Hospitalized Acute Heart Failure Syndrome Patients in Contemporary  
20  
21 Real Clinical Practice in Japan - Observations From the Prospective, Multicenter  
22  
23  
24  
25  
26  
27  
28  
29  
30  
31  
32  
33  
34  
35  
36  
37  
38  
39  
40  
41  
42  
43  
44  
45  
46  
47  
48  
49  
50  
51  
52  
53  
54  
55  
56  
57  
58  
59  
60
- 10 Butler J, Gheorghiade M, Kelkar A, *et al.* In-hospital worsening heart failure. *Eur J Heart Fail* 2015;**17**:1104–13. doi:10.1002/ejhf.333
- 11 Filippatos G, Farmakis D, Parissis J. Renal dysfunction and heart failure: Things are seldom what they seem. *Eur Heart J* 2014;**35**:416–8. doi:10.1093/eurheartj/ehf515
- 12 Vardeny O, Wu DH, Desai A, *et al.* Influence of baseline and worsening renal function on efficacy of spironolactone in patients with severe heart failure: Insights from rales (randomized aldactone evaluation study). *J Am Coll Cardiol* 2012;**60**:2082–9. doi:10.1016/j.jacc.2012.07.048



- 1  
2  
3  
4 13 Clark H, Krum H, Hopper I. Worsening renal function during  
5  
6  
7  
8 renin-angiotensin-aldosterone system inhibitor initiation and long-term outcomes in  
9  
10  
11 patients with left ventricular systolic dysfunction. *Eur J Heart Fail* 2014;**16**:41–8.  
12  
13
- 14 14 Ponikowski P, Voors AA, Anker SD, *et al.* 2016 ESC Guidelines for the diagnosis and  
15  
16  
17 treatment of acute and chronic heart failure: The Task Force for the diagnosis and  
18  
19  
20 treatment of acute and chronic heart failure of the European Society of Cardiology  
21  
22  
23 (ESC). Developed with the special contribution . *Eur J Heart Fail* 2016;**18**:891–975.  
24  
25  
26  
27 doi:10.1002/ejhf.592  
28  
29
- 30 15 Oda E, Oohara K, Abe A, *et al.* The optimal cut-off point of C-reactive protein as an  
31  
32  
33 optional component of metabolic syndrome in Japan. *Circ J* 2006;**70**:384–8.  
34  
35  
36  
37 doi:10.1253/circj.70.384  
38  
39
- 40 16 Stuck AE, Walthert JM, Nikolaus T, *et al.* Risk factors for functional status decline in  
41  
42  
43 community-living elderly people: a systematic literature review. *Soc Sci Med*  
44  
45  
46  
47 1999;**48**:445–69. doi:10.1016/S0277-9536(98)00370-0  
48  
49
- 50 17 McCusker J, Kakuma R, Abrahamowicz M. Predictors of functional decline in  
51  
52  
53 hospitalized elderly patients: a systematic review. *J Gerontol A Biol Sci Med Sci*  
54  
55  
56  
57 2002;**57**:M569-77.  
58  
59  
60

- 1  
2  
3  
4 18 Covinsky KE, Palmer RM, Fortinsky RH, *et al.* Loss of independence in activities of  
5  
6  
7  
8 daily living in older adults hospitalized with medical illnesses: increased vulnerability  
9  
10  
11 with age. *J Am Geriatr Soc* 2003;**51**:451–8.  
12  
13  
14 19 Inouye SK, Bogardus ST, Baker DI, *et al.* The hospital elder life program: A model of  
15  
16  
17 care to prevent cognitive and functional decline in older hospitalized patients. *J Am*  
18  
19  
20 *Geriatr Soc* 2000;**48**:1697–706. doi:10.1111/j.1532-5415.2000.tb03885.x  
21  
22  
23  
24 20 Pandharipande PP, Girard TD, Jackson JC, *et al.* Long-term cognitive impairment after  
25  
26  
27 critical illness. *N Engl J Med* 2013;**369**:1306–16. doi:10.1056/NEJMoa1301372  
28  
29  
30  
31 21 Hirvensalo M, Rantanen T, Heikkinen E. Mobility difficulties and physical activity as  
32  
33  
34 predictors of mortality and loss of independence in the community-living older  
35  
36  
37 population. *J Am Geriatr Soc* 2000;**48**:493–8.  
38  
39  
40  
41 doi:10.1111/j.1532-5415.2000.tb04994.x  
42  
43  
44 22 Greiner PA, Snowdon DA, Schmitt FA. The loss of independence in activities of daily  
45  
46  
47 living: The role of low normal cognitive function in elderly nuns. *Am J Public Health*  
48  
49  
50  
51 1996;**86**:62–6. doi:10.2105/AJPH.86.1.62  
52  
53  
54 23 Ganguli M, MPH ES, PhD SB, *et al.* Cognitive Impairment and the Use of Health  
55  
56  
57 Services in an Elderly Rural Population: The MoVIES Project. *J Am Geriatr Soc*  
58  
59  
60

- 1  
2  
3  
4 1993;**41**:1065–70. doi:10.1111/j.1532-5415.1993.tb06453.x  
5  
6  
7  
8 24 Barberger-Gateau P, Fabrigoule C. Disability and cognitive impairment in the elderly.  
9  
10  
11 *Disabil Rehabil* 1997;**19**:175–93.  
12  
13  
14 25 Black SA, Rush RD. Cognitive and functional decline in adults aged 75 and older. *J*  
15  
16  
17 *Am Geriatr Soc* 2002;**50**:1978–86. doi:10.1046/j.1532-5415.2002.50609.x  
18  
19  
20  
21 26 Hirsch CH, Sommers L, Olsen A, *et al*. The natural history of functional morbidity in  
22  
23  
24 hospitalized older patients. *J Am Geriatr Soc* 1990;**38**:1296–303.  
25  
26  
27  
28 27 O'Connor CM, Whellan DJ, Lee KL, *et al*. Efficacy and safety of exercise training in  
29  
30  
31 patients with chronic heart failure: HF-ACTION randomized controlled trial. *JAMA*  
32  
33  
34 2009;**301**:1439–50. doi:10.1001/jama.2009.454  
35  
36  
37  
38 28 Baztán JJ, Suárez-García FM, López-Arrieta J, *et al*. Effectiveness of acute geriatric  
39  
40  
41 units on functional decline, living at home, and case fatality among older patients  
42  
43  
44 admitted to hospital for acute medical disorders: Meta-analysis. *BMJ* 2009;**338**:334–6.  
45  
46  
47  
48 doi:10.1136/bmj.b50  
49  
50  
51 29 Fox MT, Persaud M, Maimets I, *et al*. Effectiveness of acute geriatric unit care using  
52  
53  
54 acute care for elders components: A systematic review and meta-analysis. *J Am*  
55  
56  
57 *Geriatr Soc* 2012;**60**:2237–45. doi:10.1111/jgs.12028  
58  
59  
60

- 1  
2  
3  
4 30 Bachmann S, Finger C, Huss A, *et al.* Inpatient rehabilitation specifically designed for  
5  
6  
7 geriatric patients: Systematic review and meta-analysis of randomised controlled trials.  
8  
9

10  
11 *BMJ* 2010;**340**:1230. doi:10.1136/bmj.c1718  
12  
13  
14  
15  
16  
17  
18  
19  
20  
21  
22  
23  
24  
25  
26  
27  
28  
29  
30  
31  
32  
33  
34  
35  
36  
37  
38  
39  
40  
41  
42  
43  
44  
45  
46  
47  
48  
49  
50  
51  
52  
53  
54  
55  
56  
57  
58  
59  
60

For peer review only

1  
2  
3  
4 **Figure legends**  
5

6  
7 **Figure 1. Patient Flowchart.** KCHF=Kyoto Congestive Heart Failure, ADHF=acute  
8  
9  
10  
11 decompensated heart failure.  
12

13  
14 **Figure 2. Clinical Factors Associated with Functional Decline during Hospitalization in**  
15  
16  
17 **the Univariate and Multivariable Logistic Regression Models.** BMI=body mass index,  
18  
19  
20  
21 LVEF=left ventricular ejection, HF=heart failure, eGFR=estimated glomerular filtration rate,  
22  
23  
24  
25  
26  
27  
28  
29  
30  
31  
32  
33  
34  
35  
36  
37  
38  
39  
40  
41  
42  
43  
44  
45  
46  
47  
48  
49  
50  
51  
52  
53  
54  
55  
56  
57  
58  
59  
60  
BP=blood pressure, NYHA=New York Heart Association, OR=odds ratio, CI=confidence  
interval.

31  
32  
33  
34  
35  
36  
37  
38  
39  
40  
41  
42  
43  
44  
45  
46  
47  
48  
49  
50  
51  
52  
53  
54  
55  
56  
57  
58  
59  
60  
**Figure 3. The Cumulative Incidences for the Primary Outcome Measure (A), for**  
**All-cause Death (B), and for HF Hospitalization (C) According to the Presence or**  
**Absence of Functional Decline.** HF=heart failure, HR=hazard ratio, CI=confidence interval.

**Table 1. Baseline Patient Characteristics**

|                                           | <b>Functional<br/>decline</b> | <b>No functional<br/>decline</b> | <b>P value</b> |
|-------------------------------------------|-------------------------------|----------------------------------|----------------|
|                                           | N=528                         | N=3027                           |                |
| <b>Baseline characteristics</b>           |                               |                                  |                |
| Age, years                                | 85 [80–89]                    | 79 [70–85]                       | <0.001         |
| Age ≥80 years*                            | 399 (76)                      | 1407 (46)                        | <0.001         |
| Women*                                    | 294 (56)                      | 1278 (42)                        | <0.001         |
| BMI, kg/m <sup>2</sup>                    | 22.0±4.0                      | 23.1±4.5                         | <0.001         |
| BMI ≤22 kg/m <sup>2</sup> *               | 269 (55)                      | 1281 (44)                        | <0.001         |
| <b>Medical history</b>                    |                               |                                  |                |
| Prior HF hospitalization*                 | 186 (36)                      | 1077 (36)                        | 0.92           |
| Atrial fibrillation/flutter*              | 220 (42)                      | 1263 (42)                        | 0.98           |
| Hypertension*                             | 406 (77)                      | 2174 (72)                        | 0.02           |
| Diabetes mellitus*                        | 187 (35)                      | 1145 (38)                        | 0.29           |
| Prior myocardial infarction*              | 112 (21)                      | 681 (23)                         | 0.51           |
| Prior stroke*                             | 125 (24)                      | 432 (14)                         | <0.001         |
| Current smoking*                          | 28 (5.5)                      | 425 (14)                         | <0.001         |
| Malignancy                                | 97 (18)                       | 419 (14)                         | 0.006          |
| Chronic lung disease*                     | 41 (7.8)                      | 247 (8.2)                        | 0.76           |
| Dementia*                                 | 175 (33)                      | 423 (14)                         | <0.001         |
| <b>Social backgrounds</b>                 |                               |                                  |                |
| Poor medical adherence                    | 100 (19)                      | 498 (16)                         | 0.16           |
| Living alone*                             | 127 (24)                      | 652 (22)                         | 0.20           |
| Public assistance                         | 24 (4.6)                      | 186 (6.1)                        | 0.14           |
| <b>Functional status before admission</b> |                               |                                  |                |
| Ambulatory                                | 420 (80)                      | 2529 (84)                        | 0.02           |
| Use of wheelchair<br>[outdoor only]       | 80 (15)                       | 192 (6.3)                        | <0.001         |
| Use of wheelchair<br>[outdoor and indoor] | 28 (5.3)                      | 306 (10)                         | <.0001         |
| <b>Underlying heart disease</b>           |                               |                                  |                |
| Ischemic                                  | 134 (25)                      | 820 (27)                         | 0.41           |

|                          |          |           |        |
|--------------------------|----------|-----------|--------|
| Acute coronary syndrome* | 36 (6.8) | 166 (5.5) | 0.22   |
| Hypertensive             | 131 (25) | 754 (25)  | 0.96   |
| Valvular                 | 124 (23) | 565 (19)  | <0.001 |
| Cardiomyopathy           | 54 (10)  | 492 (16)  | <0.001 |

### Clinical signs and symptoms at presentation

|                                 |          |           |        |
|---------------------------------|----------|-----------|--------|
| Orthopnoea (moderate or severe) | 321 (64) | 1743 (60) | 0.09   |
| Rales (moderate or severe)      | 302 (59) | 1522 (52) | 0.002  |
| Systolic BP, mmHg               | 144±32   | 149±35    | 0.003  |
| Systolic BP ≥140 mmHg           | 275 (53) | 1741 (58) | 0.03   |
| Systolic BP <90 mmHg*           | 12 (2.3) | 76 (2.5)  | 0.76   |
| Diastolic BP, mmHg              | 81±23    | 86±24     | <0.001 |
| Heart rate, beat/min            | 93±27    | 96±28     | 0.001  |
| Heart rate <60 beat/min*        | 44 (8.5) | 195 (6.5) | 0.11   |
| Body temperature, °C            | 36.6±0.7 | 36.5±0.6  | <0.001 |
| Body temperature ≥37.5°C*       | 58 (11)  | 154 (5.3) | <0.001 |

### Data on admission

|                                 |          |           |       |
|---------------------------------|----------|-----------|-------|
| Orthopnoea (moderate or severe) | 208 (44) | 1090 (40) | 0.08  |
| Rales (moderate or severe)      | 213 (47) | 1021 (39) | 0.001 |
| Systolic BP, mmHg               |          |           |       |
| Systolic BP ≥140 mmHg           | 198 (38) | 1199 (40) | 0.29  |
| Systolic BP <90 mmHg            | 8 (66)   | 58 (2.0)  | 0.51  |
| Heart rate, beat/min            | 86±21    | 89±23     | 0.03  |

### Echocardiography and Laboratory tests

|                                 |                    |                   |        |
|---------------------------------|--------------------|-------------------|--------|
| LVEF                            | 48±16              | 46±16             | 0.02   |
| HF <sub>r</sub> EF (EF<40%)*    | 167 (32)           | 1148 (38)         | 0.006  |
| HF <sub>mr</sub> EF (EF 40–49%) | 117 (22)           | 566 (19)          | 0.06   |
| HF <sub>p</sub> EF (EF ≥50%)    | 242 (46)           | 1305 (43)         | 0.24   |
| Haemoglobin, g/dL               | 11.0±2.1           | 11.7±2.4          | <0.001 |
| Anaemia*†                       | 401 (76)           | 1946 (64)         | <0.001 |
| BNP, pg/ml                      | 782 [448–1410]     | 687 [375–1214]    | <0.001 |
| NT-pro BNP, pg/ml               | 10795 [3450–18000] | 5416 [2629–11438] | 0.001  |
| Creatinine, mg/dL               | 1.2 [0.8–1.6]      | 1.1 [0.8–1.6]     | 0.21   |
| eGFR, ml/min/1.73m <sup>2</sup> | 38 [24–54]         | 46 [30–62]        | <0.001 |

|                                      |            |            |        |
|--------------------------------------|------------|------------|--------|
| eGFR <30 ml/min/1.73m <sup>2</sup> * | 195 (37)   | 747 (25)   | <0.001 |
| Blood urea nitrogen, mg/dL           | 28 (20–39) | 23 (17–33) | <0.001 |
| Albumin, g/dL                        | 3.3±0.5    | 3.5±0.5    | <0.001 |
| Albumin <3.0 g/dL*                   | 112 (22)   | 332 (11)   | <0.001 |
| Sodium, mEq/L                        | 138±4.7    | 139±4.1    | <0.001 |
| Sodium <135 mEq/L*                   | 83 (16)    | 325 (11)   | 0.001  |
| Potassium, mEq/L                     | 4.3±0.8    | 4.2±0.6    | 0.03   |

Continuous variables were presented as mean ± SD or median with [interquartile range].

Categorical variables were presented as number (percentage).

\* Risk-adjusting variables selected for Cox proportional hazard models.

† Defined by the World Health Organization criteria (haemoglobin <12 g/dL for women and <13 g/dL for men).

BMI=body mass index, HF=heart failure, BP=blood pressure, LVEF=left ventricular ejection fraction, HFrEF=heart failure with reduced ejection fraction, HFmrEF=heart failure with mid-range ejection fraction, HFpEF=heart failure with preserved ejection fraction, BNP=brain-type natriuretic peptide, NT-proBNP=N-terminal pro brain-type natriuretic peptide, eGFR=estimated glomerular filtration rate.



**Table 2. In-hospital Management and Outcome**

|                                                               | <b>Functional<br/>decline</b> | <b>No functional<br/>decline</b> | <b>P value</b> |
|---------------------------------------------------------------|-------------------------------|----------------------------------|----------------|
|                                                               | N=528                         | N=3027                           |                |
| <b>In-hospital management</b>                                 |                               |                                  |                |
| Management in the emergency room                              |                               |                                  |                |
| Respiratory management                                        |                               |                                  |                |
| Oxygen inhalation                                             | 295 (56)                      | 1382 (46)                        | <0.001         |
| NPPV                                                          | 82 (16)                       | 423 (14)                         | 0.35           |
| Intubation                                                    | 11 (2.1)                      | 53 (1.8)                         | 0.60           |
| Intravenous drugs within 24 hours after hospital presentation |                               |                                  |                |
| Inotropes                                                     | 101 (19)                      | 405 (13)                         | <0.001         |
| Furosemide                                                    | 446 (85)                      | 2536 (84)                        | 0.69           |
| <b>In-hospital clinical outcomes</b>                          |                               |                                  |                |
| In-hospital adverse events                                    |                               |                                  |                |
| Stroke                                                        | 27 (5.1)                      | 26 (0.9)                         | <0.001         |
| Worsening heart failure                                       | 130 (25)                      | 490 (16)                         | <0.001         |
| Worsening renal function                                      | 244 (47)                      | 992 (33)                         | <0.001         |
| In-hospital infection                                         | 104 (20)                      | 258 (8.5)                        | <0.001         |
| Length of stay, day                                           | 21 [14–37]                    | 15 [11–22]                       | <0.001         |
| <b>Clinical signs and symptoms at discharge</b>               |                               |                                  |                |
| Dyspnoea on exertion                                          | 206 (41)                      | 731 (25)                         | <0.001         |
| Oedema                                                        | 89 (17)                       | 320 (11)                         | <0.001         |
| General malaise                                               | 152 (31)                      | 388 (14)                         | <0.001         |
| Loss of appetite                                              | 119 (24)                      | 251 (8.7)                        | <0.001         |
| Living place after discharge                                  |                               |                                  |                |
| Home                                                          | 247 (47)                      | 2709 (90)                        | <0.001         |
| Hospital                                                      | 225 (43)                      | 180 (6.0)                        | <0.001         |
| Institution for the aged                                      | 50 (9.5)                      | 114 (3.8)                        | <0.001         |
| Other                                                         | 4 (0.8)                       | 17 (0.6)                         | 0.59           |
| <b>Medications at discharge</b>                               |                               |                                  |                |
| Number of drugs prescribed                                    | 8 (6–11)                      | 9 (6–11)                         | 0.12           |
| Drugs                                                         |                               |                                  |                |

|    |                 |          |           |        |
|----|-----------------|----------|-----------|--------|
| 1  |                 |          |           |        |
| 2  |                 |          |           |        |
| 3  |                 |          |           |        |
| 4  | Loop diuretics  | 428 (81) | 2472 (82) | 0.74   |
| 5  | RAAS inhibitors | 349 (66) | 2320 (77) | <0.001 |
| 6  | ACEI/ARB        | 242 (46) | 1838 (61) | <0.001 |
| 7  | MRA             | 208 (39) | 1409 (47) | 0.002  |
| 8  | Beta blocker    | 287 (54) | 2101 (69) | <0.001 |
| 9  | Tolvaptan       | 76 (14)  | 299 (9.9) | 0.002  |
| 10 |                 |          |           |        |
| 11 |                 |          |           |        |
| 12 |                 |          |           |        |
| 13 |                 |          |           |        |
| 14 |                 |          |           |        |
| 15 |                 |          |           |        |
| 16 |                 |          |           |        |
| 17 |                 |          |           |        |
| 18 |                 |          |           |        |
| 19 |                 |          |           |        |
| 20 |                 |          |           |        |
| 21 |                 |          |           |        |
| 22 |                 |          |           |        |
| 23 |                 |          |           |        |
| 24 |                 |          |           |        |
| 25 |                 |          |           |        |
| 26 |                 |          |           |        |
| 27 |                 |          |           |        |
| 28 |                 |          |           |        |
| 29 |                 |          |           |        |
| 30 |                 |          |           |        |
| 31 |                 |          |           |        |
| 32 |                 |          |           |        |
| 33 |                 |          |           |        |
| 34 |                 |          |           |        |
| 35 |                 |          |           |        |
| 36 |                 |          |           |        |
| 37 |                 |          |           |        |
| 38 |                 |          |           |        |
| 39 |                 |          |           |        |
| 40 |                 |          |           |        |
| 41 |                 |          |           |        |
| 42 |                 |          |           |        |
| 43 |                 |          |           |        |
| 44 |                 |          |           |        |
| 45 |                 |          |           |        |
| 46 |                 |          |           |        |
| 47 |                 |          |           |        |
| 48 |                 |          |           |        |
| 49 |                 |          |           |        |
| 50 |                 |          |           |        |
| 51 |                 |          |           |        |
| 52 |                 |          |           |        |
| 53 |                 |          |           |        |
| 54 |                 |          |           |        |
| 55 |                 |          |           |        |
| 56 |                 |          |           |        |
| 57 |                 |          |           |        |
| 58 |                 |          |           |        |
| 59 |                 |          |           |        |
| 60 |                 |          |           |        |

For peer review only

**KCHF registry**  
**4056 patients hospitalized with ADHF**  
 (Oct 2014-Mar 2016, 19 centers in Japan)

**In-hospital death during index hospitalization (N=271)**

**Excluded (N=230)**  
 No data about functional status (n = 99)  
 Bedridden before index hospitalization (n = 131)

**Study population:**  
**Patients discharged alive assessed for functional decline during hospitalization**  
**3555 patients**

**Functional decline: 528 patients**

**No functional decline: 3027 patients**

1  
2  
3  
4  
5  
6  
7  
8  
9  
10  
11  
12  
13  
14  
15  
16  
17  
18  
19  
20  
21  
22  
23  
24  
25  
26  
27  
28  
29  
30  
31

| Variables                             | Unadjusted OR (95%CI) | P Value | Adjusted OR (95%CI) | P Value |
|---------------------------------------|-----------------------|---------|---------------------|---------|
| Age ≥80 years                         | 3.56 (2.88–4.40)      | <0.001  | 2.56 (1.98–3.32)    | <0.001  |
| 1 Women                               | 1.72 (1.43–2.07)      | <0.001  | 1.27 (1.01–1.60)    | 0.04    |
| 2 BMI ≤22                             | 1.59 (1.31–1.93)      | <0.001  | 1.20 (0.96–1.50)    | 0.11    |
| 4 LVEF <40%                           | 0.76 (0.62–0.92)      | 0.006   | 1.14 (0.89–1.45)    | 0.29    |
| 5 Prior HF hospitalization            | 0.99 (0.82–1.20)      | 0.92    | 0.82 (0.65–1.04)    | 0.10    |
| 7 Acute coronary syndrome             | 1.26 (0.87–1.83)      | 0.22    | 1.53 (0.97–2.43)    | 0.07    |
| 8 Hypertension                        | 1.31 (1.05–1.62)      | 0.02    | 1.11 (0.85–1.44)    | 0.46    |
| 10 Diabetes mellitus                  | 0.90 (0.74–1.09)      | 0.29    | 1.03 (0.81–1.31)    | 0.81    |
| 11 Atrial fibrillation or flutter     | 1.00 (0.83–1.20)      | 0.98    | 1.02 (0.81–1.29)    | 0.85    |
| 12 Prior myocardial infarction        | 0.93 (0.74–1.16)      | 0.51    | 0.90 (0.69–1.19)    | 0.47    |
| 14 Prior stroke                       | 1.86 (1.49–2.33)      | <0.001  | 1.61 (1.23–2.10)    | <0.001  |
| 15 Chronic lung disease               | 1.07 (0.82–1.40)      | 0.61    | 1.14 (0.83–1.56)    | 0.41    |
| 17 Cognitive dysfunction              | 3.05 (2.48–3.76)      | <0.001  | 1.95 (1.52–2.52)    | <0.001  |
| 18 Current smoking                    | 0.35 (0.23–0.51)      | <0.001  | 0.56 (0.36–0.88)    | 0.01    |
| 20 Living alone                       | 1.15 (0.93–1.43)      | 0.20    | 1.20 (0.93–1.56)    | 0.17    |
| 21 Anemia                             | 1.74 (1.1–2.16)       | <0.001  | 1.10 (0.84–1.44)    | 0.48    |
| 23 Albumin <3.0 g/dL                  | 2.16 (1.71–2.75)      | <0.001  | 1.69 (1.27–2.24)    | <0.001  |
| 24 Sodium <135 mEq/L                  | 1.55 (1.19–2.01)      | 0.001   | 1.46 (1.07–1.98)    | 0.02    |
| 25 eGFR <30 ml/min/1.73m <sup>2</sup> | 1.79 (1.47–2.18)      | <0.001  | 1.54 (1.21–1.96)    | <0.001  |
| 27 Systolic BP <90 mmHg               | 0.91 (0.49–1.68)      | 0.76    | 0.61 (0.26–1.43)    | 0.25    |
| 28 Heart rate <60 beat/min            | 1.33 (0.95–1.87)      | 0.10    | 1.12 (0.75–1.69)    | 0.57    |
| 30 Body temperature ≥37.5 °C          | 2.30 (1.67–3.16)      | <0.001  | 1.88 (1.29–2.74)    | <0.001  |
| 32 NYHA III/IV on admission           | 1.81 (1.30–2.52)      | <0.001  | 1.51 (1.05–2.18)    | 0.03    |

For peer review only - <http://bmjopen.bmj.com/site/about/guidelines.xhtml>

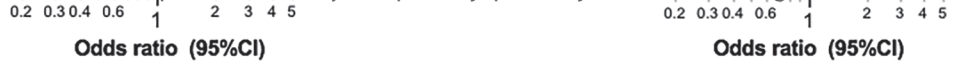

Figure 3A

**All cause death or HF hospitalization**

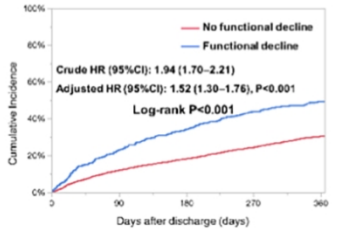

| Interval                            | 0-day | 30-day | 180-day | 1-year |
|-------------------------------------|-------|--------|---------|--------|
| <b>No functional decline</b>        |       |        |         |        |
| N of patients with at least 1 event | 159   | 337    | 487     |        |
| N of patients at risk               | 2987  | 2623   | 2419    | 1934   |
| Cumulative incidence                | 5.3%  | 18%    | 31%     |        |
| <b>Functional decline</b>           |       |        |         |        |
| N of patients with at least 1 event | 58    | 170    | 242     |        |
| N of patients at risk               | 505   | 443    | 320     | 268    |
| Cumulative incidence                | 12%   | 34%    | 50%     |        |

Figure 3B

**All cause death**

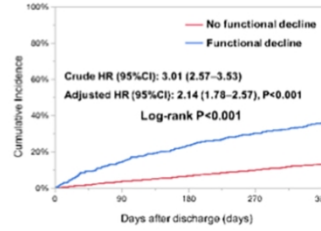

| Interval                     | 0-day | 30-day | 180-day | 1-year |
|------------------------------|-------|--------|---------|--------|
| <b>No functional decline</b> |       |        |         |        |
| N of patients with event     | 33    | 190    | 284     |        |
| N of patients at risk        | 2987  | 2642   | 2739    | 2289   |
| Cumulative incidence         | 1.1%  | 6.8%   | 13%     |        |
| <b>Functional decline</b>    |       |        |         |        |
| N of patients with event     | 32    | 115    | 174     |        |
| N of patients at risk        | 505   | 486    | 372     | 280    |
| Cumulative incidence         | 6.4%  | 24%    | 38%     |        |

Figure 3C

**HF hospitalization**

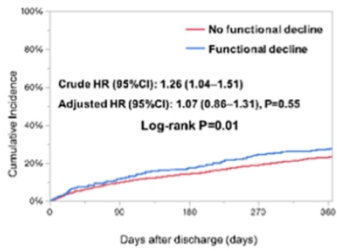

| Interval                            | 0-day | 30-day | 180-day | 1-year |
|-------------------------------------|-------|--------|---------|--------|
| <b>No functional decline</b>        |       |        |         |        |
| N of patients with at least 1 event | 138   | 417    | 669     |        |
| N of patients at risk               | 2987  | 2825   | 2419    | 1934   |
| Cumulative incidence                | 4.6%  | 14%    | 23%     |        |
| <b>Functional decline</b>           |       |        |         |        |
| N of patients with at least 1 event | 32    | 79     | 116     |        |
| N of patients at risk               | 505   | 443    | 320     | 268    |
| Cumulative incidence                | 6.5%  | 17%    | 28%     |        |

Figure 3. The Cumulative Incidences for the Primary Outcome Measure (A), for All-cause Death (B), and for HF Hospitalization (C) According to the Presence or Absence of Functional Decline.

90x134mm (300 x 300 DPI)

## Supplementary Online Content

**eTable 1.** Clinical Factors associated with Functional Decline in the Entire Cohort in the Univariate and Multivariable Analyses

**eTable 2.** Clinical Outcomes in the Entire Cohort

**eFigure 1.** The Details of Functional Decline during ADHF Hospitalization.

**eFigure 2.** Subgroup Analysis for the Association of Functional Decline with no Functional Decline on the Primary Outcome Measure.

For peer review only

**eTable 1. Clinical Factors associated with Functional Decline in the Entire Cohort in the Univariate and Multivariable Analyses**

| Variables                          | Unadjusted OR    | P Value | Adjusted OR      | P Value |
|------------------------------------|------------------|---------|------------------|---------|
| Age ≥80 years                      | 2.97 (2.50–3.52) | <0.001  | 2.25 (1.81–2.81) | <0.001  |
| Women                              | 1.45 (1.25–1.70) | <0.001  | 1.10 (0.90–1.34) | 0.37    |
| BMI ≤22                            | 1.56 (1.32–1.83) | <0.001  | 1.19 (0.98–1.45) | 0.08    |
| LVEF <40%                          | 1.04 (0.89–1.22) | 0.61    | 1.23 (1.00–1.52) | 0.048   |
| Prior HF hospitalization           | 1.08 (0.92–1.27) | 0.36    | 0.97 (0.79–1.19) | 0.80    |
| Acute coronary syndrome            | 1.56 (1.16–2.11) | 0.003   | 1.73 (1.17–2.56) | 0.006   |
| Hypertension                       | 1.00 (0.85–1.20) | 0.95    | 0.97 (0.77–1.21) | 0.76    |
| Diabetes mellitus                  | 0.86 (0.73–1.01) | 0.06    | 0.88 (0.71–1.08) | 0.22    |
| Atrial fibrillation or flutter     | 0.97 (0.83–1.13) | 0.67    | 0.91 (0.74–1.11) | 0.33    |
| Prior myocardial infarction        | 0.94 (0.78–1.13) | 0.50    | 0.87 (0.69–1.11) | 0.26    |
| Prior stroke                       | 1.73 (1.43–2.10) | <0.001  | 1.54 (1.21–1.94) | <0.001  |
| Chronic lung disease               | 1.11 (0.89–1.39) | 0.37    | 1.16 (0.89–1.52) | 0.27    |
| Cognitive dysfunction              | 2.91 (2.44–3.47) | <0.001  | 2.03 (1.63–2.53) | <0.001  |
| Current smoking                    | 0.37 (0.27–0.51) | <0.001  | 0.56 (0.38–0.82) | 0.003   |
| Living alone                       | 1.05 (0.87–1.27) | 0.62    | 1.19 (0.94–1.49) | 0.14    |
| Anaemia*                           | 1.67 (1.39–1.98) | <0.001  | 1.07 (0.85–1.35) | 0.56    |
| Albumin <3.0 g/dL                  | 2.30 (1.89–2.81) | <0.001  | 1.83 (1.44–2.33) | <0.001  |
| Sodium <135 mEq/L                  | 1.89 (1.53–2.33) | <0.001  | 1.68 (1.31–2.16) | <0.001  |
| eGFR <30 ml/min/1.73m <sup>2</sup> | 2.01 (1.70–2.36) | <0.001  | 1.76 (1.43–2.17) | <0.001  |
| Systolic BP <90 mmHg               | 2.01 (1.37–2.96) | <0.001  | 1.17 (0.67–2.05) | 0.58    |
| Heart rate <60 beat/min            | 1.07 (0.79–0.79) | 0.66    | 1.03 (0.72–1.49) | 0.87    |
| Body temperature ≥37.5 °C          | 2.26 (1.72–2.7)  | <0.001  | 1.89 (1.35–2.63) | <0.001  |
| NYHA III/IV on admission           | 2.17 (1.62–2.91) | <0.001  | 1.69 (1.21–2.35) | 0.002   |

Values are number (%), mean ± SD, or median (interquartile range).

\*Defined by the World Health Organization criteria (hemoglobin <12 g/dL for women and <13 g/dL for men).

BMI=body mass index, LVEF=left ventricular ejection, HF=heart failure, eGFR=estimated glomerular filtration rate, BP=blood pressure, NYHA=New York Heart Association, OR=odds ratio, CI=confidence interval.

**eTable 2. Clinical Outcomes in the Entire Cohort**

| Outcomes                                 | Functional decline                                                                         | No functional decline                                                                      | Unadjusted HR<br>(95% CI) | P value | Adjusted HR<br>(95% CI) | P value |
|------------------------------------------|--------------------------------------------------------------------------------------------|--------------------------------------------------------------------------------------------|---------------------------|---------|-------------------------|---------|
|                                          | N of patients with<br>event/N of patients at<br>risk (Cumulative 1-<br>year incidence [%]) | N of patients with<br>event/N of patients at<br>risk (Cumulative 1-<br>year incidence [%]) |                           |         |                         |         |
| All-cause death or<br>HF hospitalization | 242/505 (50)                                                                               | 897/2987 (31)                                                                              | 1.94<br>(1.70–2.21)       | <0.001  | 1.5<br>(1.29–1.75)      | <0.001  |
| All-cause death                          | 174/505 (36)                                                                               | 384/2987 (13)                                                                              | 3.01<br>(2.57–3.53)       | <0.001  | 2.14<br>(1.78–2.57)     | <0.001  |
| HF hospitalization                       | 116/505 (28)                                                                               | 659/2987 (23)                                                                              | 1.26<br>(1.04–1.51)       | 0.01    | 1.07<br>(0.86–1.31)     | 0.55    |

The number of patients with at least one event was counted through the 1-year follow-up period.

HF=heart failure, HR=hazard ratio, CI=confidence interval, HF=heart failure.



1  
2  
3  
4  
5  
6  
7  
8  
9  
10  
11  
12  
13  
14  
15  
16  
17  
18  
19  
20  
21  
22  
23  
24  
25  
26  
27  
28  
29  
30  
31  
32  
33  
34  
35  
36  
37  
38  
39  
40  
41  
42  
43  
44  
45  
46  
47  
48  
49  
50  
51  
52  
53  
54  
55  
56  
57  
58  
59  
60

**eFigure 1. The Details of Functional Decline during ADHF Hospitalization.** Functional status at discharge according to functional status before admission is shown. ADHF=acute decompensated heart failure.

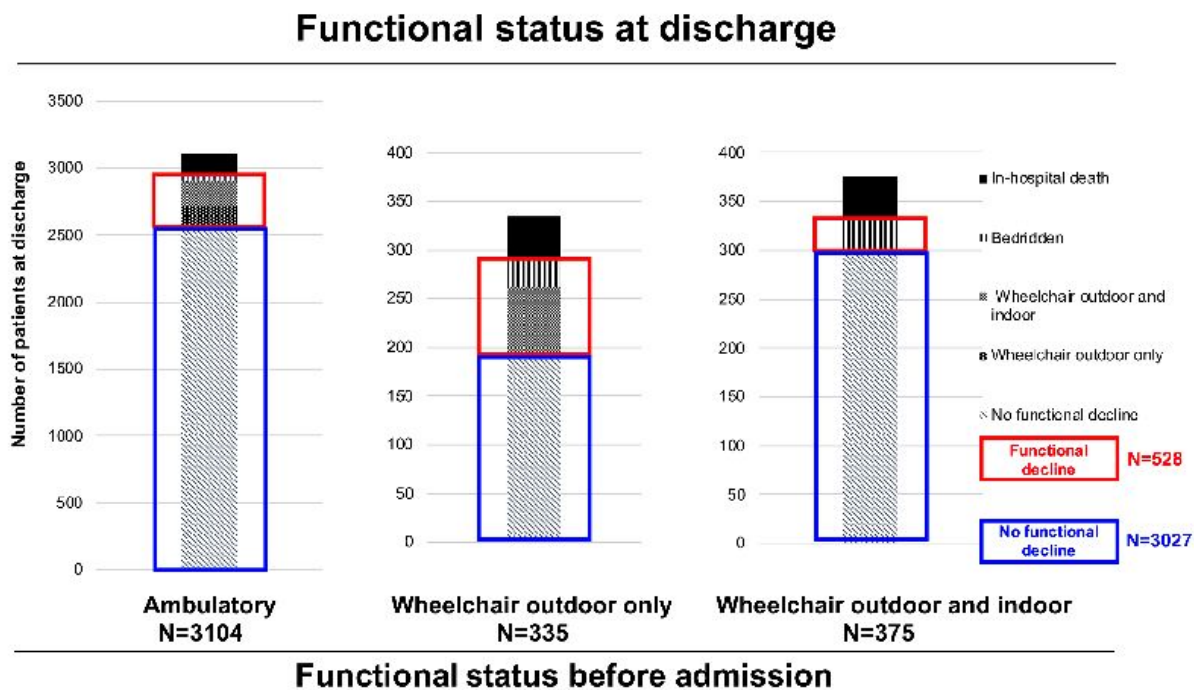

**eFigure 2. Subgroup Analysis for the Association of Functional Decline with no Functional Decline on the Primary Outcome Measure.** LVEF=left ventricular ejection

fraction, HR=hazard ratio, CI=confidence interval.

|                                     | Functional decline     | Non-functional decline | Adjusted HR (95% CI) | P value for interaction |
|-------------------------------------|------------------------|------------------------|----------------------|-------------------------|
|                                     | No. Events/No. at risk | No. Events/No. at risk |                      |                         |
| <b>Age, years</b>                   |                        |                        |                      |                         |
| <80                                 | 58/122                 | 375/1604               | 1.48 (1.08–2.02)     | 0.45                    |
| ≥80                                 | 185/390                | 527/1401               | 1.44 (1.21–1.71)     |                         |
| <b>Sex</b>                          |                        |                        |                      |                         |
| Female                              | 122/286                | 383/1271               | 1.43 (1.15–1.78)     | 0.24                    |
| Male                                | 121/226                | 519/1734               | 1.64 (1.33–2.03)     |                         |
| <b>LVEF, %</b>                      |                        |                        |                      |                         |
| <40                                 | 75/159                 | 371/1136               | 1.30 (0.98–1.69)     | 0.09                    |
| ≥40                                 | 168/351                | 528/1861               | 1.65 (1.37–1.98)     |                         |
| <b>Anaemia</b>                      |                        |                        |                      |                         |
| No                                  | 47/123                 | 210/1068               | 1.70 (1.17–2.41)     | 0.12                    |
| Yes                                 | 196/389                | 691/1931               | 1.44 (1.22–1.70)     |                         |
| <b>Albumin &lt;3.0 g/dL</b>         |                        |                        |                      |                         |
| No                                  | 169/394                | 760/2586               | 1.38 (1.16–1.64)     | 0.09                    |
| Yes                                 | 67/108                 | 117/182                | 1.95 (1.40–2.69)     |                         |
| <b>Body temperature ≥37.5 °C</b>    |                        |                        |                      |                         |
| No                                  | 211/433                | 815/2712               | 1.51 (1.29–1.76)     | 0.89                    |
| Yes                                 | 25/56                  | 42/153                 | 1.55 (0.84–2.78)     |                         |
| <b>Oedema at discharge</b>          |                        |                        |                      |                         |
| No                                  | 184/408                | 739/2597               | 1.42 (1.20–1.68)     | 0.28                    |
| Yes                                 | 51/88                  | 128/318                | 1.86 (1.23–2.80)     |                         |
| <b>General malaise at discharge</b> |                        |                        |                      |                         |
| No                                  | 142/320                | 690/2398               | 1.38 (1.15–1.67)     | 0.48                    |
| Yes                                 | 83/149                 | 151/385                | 1.62 (1.18–2.21)     |                         |

STROBE Statement—Checklist of items that should be included in reports of *cohort studies*

|                              | Item No | Recommendation                                                                                                                                                                                                                                                                                                                                                                                                |
|------------------------------|---------|---------------------------------------------------------------------------------------------------------------------------------------------------------------------------------------------------------------------------------------------------------------------------------------------------------------------------------------------------------------------------------------------------------------|
| <b>Title and abstract</b>    | 1       | (a) Indicate the study's design with a commonly used term in the title or the abstract<br>(b) Provide in the abstract an informative and balanced summary of what was done and what was found                                                                                                                                                                                                                 |
| <b>Introduction</b>          |         |                                                                                                                                                                                                                                                                                                                                                                                                               |
| Background/rationale         | 2       | Explain the scientific background and rationale for the investigation being reported                                                                                                                                                                                                                                                                                                                          |
| Objectives                   | 3       | State specific objectives, including any prespecified hypotheses                                                                                                                                                                                                                                                                                                                                              |
| <b>Methods</b>               |         |                                                                                                                                                                                                                                                                                                                                                                                                               |
| Study design                 | 4       | Present key elements of study design early in the paper                                                                                                                                                                                                                                                                                                                                                       |
| Setting                      | 5       | Describe the setting, locations, and relevant dates, including periods of recruitment, exposure, follow-up, and data collection                                                                                                                                                                                                                                                                               |
| Participants                 | 6       | (a) Give the eligibility criteria, and the sources and methods of selection of participants. Describe methods of follow-up<br>(b) For matched studies, give matching criteria and number of exposed and unexposed                                                                                                                                                                                             |
| Variables                    | 7       | Clearly define all outcomes, exposures, predictors, potential confounders, and effect modifiers. Give diagnostic criteria, if applicable                                                                                                                                                                                                                                                                      |
| Data sources/<br>measurement | 8*      | For each variable of interest, give sources of data and details of methods of assessment (measurement). Describe comparability of assessment methods if there is more than one group                                                                                                                                                                                                                          |
| Bias                         | 9       | Describe any efforts to address potential sources of bias                                                                                                                                                                                                                                                                                                                                                     |
| Study size                   | 10      | Explain how the study size was arrived at                                                                                                                                                                                                                                                                                                                                                                     |
| Quantitative variables       | 11      | Explain how quantitative variables were handled in the analyses. If applicable, describe which groupings were chosen and why                                                                                                                                                                                                                                                                                  |
| Statistical methods          | 12      | (a) Describe all statistical methods, including those used to control for confounding<br>(b) Describe any methods used to examine subgroups and interactions<br>(c) Explain how missing data were addressed<br>(d) If applicable, explain how loss to follow-up was addressed<br>(e) Describe any sensitivity analyses                                                                                        |
| <b>Results</b>               |         |                                                                                                                                                                                                                                                                                                                                                                                                               |
| Participants                 | 13*     | (a) Report numbers of individuals at each stage of study—eg numbers potentially eligible, examined for eligibility, confirmed eligible, included in the study, completing follow-up, and analysed<br>(b) Give reasons for non-participation at each stage<br>(c) Consider use of a flow diagram                                                                                                               |
| Descriptive data             | 14*     | (a) Give characteristics of study participants (eg demographic, clinical, social) and information on exposures and potential confounders<br>(b) Indicate number of participants with missing data for each variable of interest<br>(c) Summarise follow-up time (eg, average and total amount)                                                                                                                |
| Outcome data                 | 15*     | Report numbers of outcome events or summary measures over time                                                                                                                                                                                                                                                                                                                                                |
| Main results                 | 16      | (a) Give unadjusted estimates and, if applicable, confounder-adjusted estimates and their precision (eg, 95% confidence interval). Make clear which confounders were adjusted for and why they were included<br>(b) Report category boundaries when continuous variables were categorized<br>(c) If relevant, consider translating estimates of relative risk into absolute risk for a meaningful time period |

|    |                          |    |                                                                                        |
|----|--------------------------|----|----------------------------------------------------------------------------------------|
| 1  | Other analyses           | 17 | Report other analyses done—eg analyses of subgroups and interactions, and              |
| 2  |                          |    | sensitivity analyses                                                                   |
| 3  | <hr/>                    |    |                                                                                        |
| 4  | <b>Discussion</b>        |    |                                                                                        |
| 5  | Key results              | 18 | Summarise key results with reference to study objectives                               |
| 6  | Limitations              | 19 | Discuss limitations of the study, taking into account sources of potential bias or     |
| 7  |                          |    | imprecision. Discuss both direction and magnitude of any potential bias                |
| 8  | <hr/>                    |    |                                                                                        |
| 9  | Interpretation           | 20 | Give a cautious overall interpretation of results considering objectives, limitations, |
| 10 |                          |    | multiplicity of analyses, results from similar studies, and other relevant evidence    |
| 11 | <hr/>                    |    |                                                                                        |
| 12 | Generalisability         | 21 | Discuss the generalisability (external validity) of the study results                  |
| 13 | <hr/>                    |    |                                                                                        |
| 14 | <b>Other information</b> |    |                                                                                        |
| 15 | Funding                  | 22 | Give the source of funding and the role of the funders for the present study and, if   |
| 16 |                          |    | applicable, for the original study on which the present article is based               |
| 17 | <hr/>                    |    |                                                                                        |

\*Give information separately for exposed and unexposed groups.

**Note:** An Explanation and Elaboration article discusses each checklist item and gives methodological background and published examples of transparent reporting. The STROBE checklist is best used in conjunction with this article (freely available on the Web sites of PLoS Medicine at <http://www.plosmedicine.org/>, Annals of Internal Medicine at <http://www.annals.org/>, and Epidemiology at <http://www.epidem.com/>). Information on the STROBE Initiative is available at <http://www.strobe-statement.org>.

# BMJ Open

## Risk factors and clinical outcomes of functional decline during acute decompensated heart failure hospitalization: an observational study

|                                 |                                                                                                                                                                                                                                                                                                                                                                                                                                                                                                                                                                                                                                                                                                                                                                                                                                                                                                                                                                                                                                                                                                                                                                                                                                                                                                                                                                                                                                                                                                                                                                                                                                                              |
|---------------------------------|--------------------------------------------------------------------------------------------------------------------------------------------------------------------------------------------------------------------------------------------------------------------------------------------------------------------------------------------------------------------------------------------------------------------------------------------------------------------------------------------------------------------------------------------------------------------------------------------------------------------------------------------------------------------------------------------------------------------------------------------------------------------------------------------------------------------------------------------------------------------------------------------------------------------------------------------------------------------------------------------------------------------------------------------------------------------------------------------------------------------------------------------------------------------------------------------------------------------------------------------------------------------------------------------------------------------------------------------------------------------------------------------------------------------------------------------------------------------------------------------------------------------------------------------------------------------------------------------------------------------------------------------------------------|
| Journal:                        | <i>BMJ Open</i>                                                                                                                                                                                                                                                                                                                                                                                                                                                                                                                                                                                                                                                                                                                                                                                                                                                                                                                                                                                                                                                                                                                                                                                                                                                                                                                                                                                                                                                                                                                                                                                                                                              |
| Manuscript ID                   | bmjopen-2019-032674.R1                                                                                                                                                                                                                                                                                                                                                                                                                                                                                                                                                                                                                                                                                                                                                                                                                                                                                                                                                                                                                                                                                                                                                                                                                                                                                                                                                                                                                                                                                                                                                                                                                                       |
| Article Type:                   | Original research                                                                                                                                                                                                                                                                                                                                                                                                                                                                                                                                                                                                                                                                                                                                                                                                                                                                                                                                                                                                                                                                                                                                                                                                                                                                                                                                                                                                                                                                                                                                                                                                                                            |
| Date Submitted by the Author:   | 27-Nov-2019                                                                                                                                                                                                                                                                                                                                                                                                                                                                                                                                                                                                                                                                                                                                                                                                                                                                                                                                                                                                                                                                                                                                                                                                                                                                                                                                                                                                                                                                                                                                                                                                                                                  |
| Complete List of Authors:       | Yaku, Hidenori; Kyoto University Graduate School of Medicine Faculty of Medicine, Department of Cardiovascular Medicine; Mitsubishi Kyoto Hospital, Cardiology<br>Kato, Takao; Kyoto University Graduate School of Medicine Faculty of Medicine, Department of Cardiovascular Medicine<br>Morimoto, Takeshi; Hyogo College of Medicine, Clinical Epidemiology<br>Inuzuka, Yasutaka; Shiga General Hospital, Cardiovascular Medicine<br>Tamaki, Yodo; Public Interest Incorporated Foundation Tenri Hospital, Cardiology<br>Ozasa, Neiko; Kyoto University Graduate School of Medicine Faculty of Medicine, Department of Cardiovascular Medicine<br>Yamamoto, Erika; Kyoto University Graduate School of Medicine Faculty of Medicine, Department of Cardiovascular Medicine<br>Yoshikawa, Yusuke; Kyoto University Graduate School of Medicine Faculty of Medicine, Department of Cardiovascular Medicine<br>Kitai, Takeshi; Kobe City Medical Center General Hospital, Cardiovascular Medicine<br>Kato, Masashi; Mitsubishi Kyoto Hospital, Department of Cardiology<br>Ikeda, Tomoyuki; Hikone Municipal Hospital, Department of Cardiology<br>Furukawa, Yutaka; Kobe City Medical Center General Hospital, Cardiovascular Medicine<br>Nakagawa, Yoshihisa; Shiga University of Medical Science, Cardiovascular Medicine<br>Sato, Yukihiro; Hyogo Prefectural Amagasaki General Medical Center, Cardiology<br>Kuwahara, Koichiro ; Shinshu University Graduate School of Medicine School of Medicine, Cardiovascular Medicine<br>Kimura, Takeshi; Kyoto University Graduate School of Medicine Faculty of Medicine, Department of Cardiovascular Medicine |
| <b>Primary Subject Heading</b>: | Cardiovascular medicine                                                                                                                                                                                                                                                                                                                                                                                                                                                                                                                                                                                                                                                                                                                                                                                                                                                                                                                                                                                                                                                                                                                                                                                                                                                                                                                                                                                                                                                                                                                                                                                                                                      |
| Secondary Subject Heading:      | Cardiovascular medicine                                                                                                                                                                                                                                                                                                                                                                                                                                                                                                                                                                                                                                                                                                                                                                                                                                                                                                                                                                                                                                                                                                                                                                                                                                                                                                                                                                                                                                                                                                                                                                                                                                      |
| Keywords:                       | Heart failure < CARDIOLOGY, Adult cardiology < CARDIOLOGY, Cardiac Epidemiology < CARDIOLOGY                                                                                                                                                                                                                                                                                                                                                                                                                                                                                                                                                                                                                                                                                                                                                                                                                                                                                                                                                                                                                                                                                                                                                                                                                                                                                                                                                                                                                                                                                                                                                                 |
|                                 |                                                                                                                                                                                                                                                                                                                                                                                                                                                                                                                                                                                                                                                                                                                                                                                                                                                                                                                                                                                                                                                                                                                                                                                                                                                                                                                                                                                                                                                                                                                                                                                                                                                              |

1  
2  
3  
4  
5  
6  
7  
8  
9  
10  
11  
12  
13  
14  
15  
16  
17  
18  
19  
20  
21  
22  
23  
24  
25  
26  
27  
28  
29  
30  
31  
32  
33  
34  
35  
36  
37  
38  
39  
40  
41  
42  
43  
44  
45  
46  
47  
48  
49  
50  
51  
52  
53  
54  
55  
56  
57  
58  
59  
60

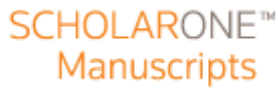

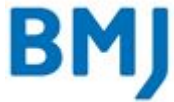

I, the Submitting Author has the right to grant and does grant on behalf of all authors of the Work (as defined in the below author licence), an exclusive licence and/or a non-exclusive licence for contributions from authors who are: i) UK Crown employees; ii) where BMJ has agreed a CC-BY licence shall apply, and/or iii) in accordance with the terms applicable for US Federal Government officers or employees acting as part of their official duties; on a worldwide, perpetual, irrevocable, royalty-free basis to BMJ Publishing Group Ltd ("BMJ") its licensees and where the relevant Journal is co-owned by BMJ to the co-owners of the Journal, to publish the Work in this journal and any other BMJ products and to exploit all rights, as set out in our [licence](#).

The Submitting Author accepts and understands that any supply made under these terms is made by BMJ to the Submitting Author unless you are acting as an employee on behalf of your employer or a postgraduate student of an affiliated institution which is paying any applicable article publishing charge ("APC") for Open Access articles. Where the Submitting Author wishes to make the Work available on an Open Access basis (and intends to pay the relevant APC), the terms of reuse of such Open Access shall be governed by a Creative Commons licence – details of these licences and which [Creative Commons](#) licence will apply to this Work are set out in our licence referred to above.

Other than as permitted in any relevant BMJ Author's Self Archiving Policies, I confirm this Work has not been accepted for publication elsewhere, is not being considered for publication elsewhere and does not duplicate material already published. I confirm all authors consent to publication of this Work and authorise the granting of this licence.

1  
2  
3  
4 **1 Risk factors and clinical outcomes of functional decline during acute decompensated**  
5  
6  
7 **2 heart failure hospitalization: an observational study**  
8  
9  
10  
11  
12

13 **4 Authors:** Hidenori Yaku, MD <sup>a,f</sup>, Takao Kato, MD <sup>a</sup>, Takeshi Morimoto, MD, MPH <sup>b</sup>,  
14  
15 Yasutaka Inuzuka, MD <sup>c</sup>, Yodo Tamaki, MD <sup>d</sup>, Neiko Ozasa, MD <sup>a</sup>, Erika Yamamoto, MD <sup>a</sup>,  
16  
17 Yusuke Yoshikawa, MD <sup>a</sup>, Takeshi Kitai, MD <sup>e</sup>, Masashi Kato, MD <sup>f</sup>, Tomoyuki Ikeda  
18  
19 <sup>g</sup>, Yutaka Furukawa, MD <sup>e</sup>, Yoshihisa Nakagawa, MD <sup>h</sup>, Yukihiro Sato, MD <sup>i</sup>, Koichiro  
20  
21  
22  
23 <sup>8</sup> Kuwahara, MD <sup>j</sup>, Takeshi Kimura, MD <sup>a</sup>, for the KCHF study investigators  
24  
25  
26  
27

28 **10 Affiliations:** <sup>a</sup> Department of Cardiovascular Medicine, Kyoto University Graduate School of  
29  
30  
31  
32 <sup>11</sup> Medicine, Kyoto, Japan; <sup>b</sup> Department of Clinical Epidemiology, Hyogo College of  
33  
34  
35 <sup>12</sup> Medicine, Hyogo, Japan; <sup>c</sup> Department of Cardiovascular Medicine, Shiga General Hospital,  
36  
37  
38 <sup>13</sup> Shiga, Japan; <sup>d</sup> Division of Cardiology, Tenri Hospital, Nara, Japan; <sup>e</sup> Department of  
39  
40  
41  
42 <sup>14</sup> Cardiovascular Medicine, Kobe City Medical Centre General Hospital, Hyogo, Japan; <sup>f</sup>  
43  
44  
45 <sup>15</sup> Department of Cardiology, Mitsubishi Kyoto Hospital, Kyoto, Japan; <sup>g</sup> Department of  
46  
47  
48 <sup>16</sup> Cardiology, Hikone Municipal Hospital, Shiga, Japan; <sup>h</sup> Department of Cardiovascular  
49  
50  
51  
52 <sup>17</sup> Medicine, Shiga University of Medical Science, Shiga, Japan; <sup>i</sup> Department of Cardiology,  
53  
54  
55 <sup>18</sup> Hyogo Prefectural Amagasaki General Medical Centre, Hyogo, Japan; <sup>j</sup> Department of  
56  
57  
58 <sup>19</sup> Cardiovascular Medicine, Shinshu University Graduate School of Medicine, Nagano, Japan.  
59  
60



1

2 **Corresponding Author:** Takao Kato, MD.

3 Department of Cardiovascular Medicine, Kyoto University Graduate School of Medicine

4 54 Shogoin Kawahara-cho, Sakyo-ku, Kyoto. 606-8507 Japan

5 Tel: +81-75-751-4254; FAX: +81-75-751-3289; E-mail: [tkato75@kuhp.kyoto-u.ac.jp](mailto:tkato75@kuhp.kyoto-u.ac.jp)

6

7 **Manuscript word count:** 2903 words

8

1  
2  
3  
4 **1 Abstract**

5  
6  
7 **2 Objective:** To investigate the prevalence and risk factors of functional decline during  
8  
9  
10  
11 **3** hospitalization, and its relationship with post-discharge outcomes in patients with acute  
12  
13  
14 **4** decompensated heart failure (ADHF) hospitalization.

15  
16  
17 **5 Design:** Prospective cohort study between October 1, 2014, and March 31, 2016.

18  
19  
20  
21 **6 Setting:** A physician-initiated multicentre study of consecutive patients admitted for ADHF  
22  
23  
24 **7** into 19 hospitals throughout Japan.

25  
26  
27 **8 Participants:** Among 3555 patients hospitalized for ADHF (median age [IQR], 80 [71-86]  
28  
29  
30  
31 **9** years; 1572 [44%] women), functional decline during the index hospitalization occurred in  
32  
33  
34 **10** 528 patients (15%).

35  
36  
37 **11 Primary and secondary outcomes:** The primary outcome measure was a composite of all-  
38  
39  
40  
41 **12** cause death or heart failure hospitalization after discharge. The secondary outcome measures  
42  
43  
44 **13** were all-cause death, heart failure hospitalization, and a composite of all-cause death or all-  
45  
46  
47 **14** cause hospitalization.

48  
49  
50  
51 **15 Results:** The independent risk factors for functional decline included age  $\geq 80$  years (OR  
52  
53  
54 **16** 2.56; 95% CI 1.98–3.32), women (OR 1.27; 95% CI 1.01–1.60), prior stroke (OR 1.61; 95%  
55  
56  
57 **17** CI 1.23–2.10), dementia (OR 1.95; 95% CI 1.52–2.52), elevated body temperature (OR 1.88;  
58  
59  
60

1  
2  
3  
4 1 95% CI 1.29–2.74), hyponatremia (OR 1.46; 95% CI 1.07–1.98), decreased albumin levels  
5  
6  
7  
8 2 (OR 1.69; 95% CI 1.27–2.24), renal dysfunction (OR 1.54; 95% CI 1.21–1.96), and New  
9  
10  
11 3 York Heart Association class III or IV on admission (OR 1.51; 95% CI 1.05–2.18) after  
12  
13  
14 4 multivariable adjustment. The cumulative 1-year incidence of the primary outcome in the  
15  
16  
17 5 functional decline group was significantly higher than that in the no functional decline group  
18  
19  
20 6 (50% vs. 31%, log-rank  $P < 0.001$ ). After adjusting for baseline characteristics, the higher risk  
21  
22  
23  
24 7 of the functional decline group relative to the no functional decline group remained  
25  
26  
27 8 significant (adjusted HR 1.39; 95% CI 1.18–1.62;  $P < 0.001$ ).

28  
29  
30  
31 9 **Conclusions:** Independent risk factors of functional decline in ADHF patients were related to  
32  
33  
34 10 both frailty and severity of heart failure. Functional decline during ADHF hospitalization was  
35  
36  
37 11 associated with unfavourable post-discharge outcomes.

38  
39  
40  
41 12 **Trial Registration:** <https://clinicaltrials.gov/ct2/show/NCT02334891> (NCT02334891) and  
42  
43  
44 13 [https://upload.umin.ac.jp/cgi-open-bin/ctr\\_e/ctr\\_view.cgi?recptno=R000017241](https://upload.umin.ac.jp/cgi-open-bin/ctr_e/ctr_view.cgi?recptno=R000017241)  
45  
46  
47 14 (UMIN000015238)

48  
49  
50 15  
51  
52  
53  
54  
55  
56  
57  
58  
59  
60

## 1 Strengths and limitations of this study

- 2 • This study is the first large-scale contemporary multicentre observational study reporting  
3 the prevalence of functional decline in patients hospitalized for acute decompensated  
4 heart failure (ADHF).
- 5 • The data of this study were prospectively collected on consecutive patients who had  
6 hospital admission due to ADHF in the real-world clinical practice in Japan.
- 7 • This study examines the risk factors of functional decline in patients hospitalized for  
8 ADHF, and whether functional decline during the index hospitalization was associated  
9 with worse post-discharge outcomes.
- 10 • We did not collect data regarding on-site and outpatient rehabilitation and nutritional  
11 support.

## 1 Introduction

2 Functional decline in hospitalized patients is a complex and dynamic process [1–3].  
3 Functional decline during hospitalization was reported to occur in approximately 30-50% of  
4 patients hospitalized for acute medical illness [2,4,5]. In the rapidly aging societies, the  
5 number of patients hospitalized for acute decompensated heart failure (ADHF) is increasing,  
6 and ADHF has become the leading cause of hospitalization due to acute medical illness. In  
7 older patients, functional decline associated with hospitalization often leads to subsequent  
8 inability to live actively and independently.

9 However, there is a scarcity of data regarding the risk factors of functional decline  
10 in patients hospitalized for ADHF. Identifying high-risk patients for functional decline during  
11 hospitalization would be useful for its prevention. Furthermore, no previous study focused on  
12 subsequent clinical outcomes in patients with functional decline during hospitalization.

13 Therefore, we sought to clarify the risk factors for functional decline during hospitalization in  
14 patients with ADHF and to compare the 1-year clinical outcomes between the 2 groups of  
15 patients with and without functional decline during the hospitalization for ADHF in a large  
16 Japanese observational database of hospitalized patients for ADHF in the real-world clinical  
17 practice.

## 1 **Methods**

### 2 **Study Design, Setting, and Population**

3           The Kyoto Congestive Heart Failure (KCHF) registry is a physician-initiated,  
4 prospective, observational, multicentre cohort study that enrolled consecutive patients who  
5 were hospitalized for ADHF for the first time between October 1, 2014, and March 31, 2016.  
6 These patients were admitted into 19 secondary and tertiary hospitals, including rural and  
7 urban as well as large and small institutions, throughout Japan. The study protocol was  
8 approved by the institutional review board of Kyoto University (approval number: E2311)  
9 and each participating centre. A waiver of written informed consent from each patient was  
10 granted by the institutional review boards of Kyoto University and each participating centre  
11 because the study met the conditions of the Japanese ethical guidelines for epidemiological  
12 study and the US policy for protecting human research participants.[6,7] This study followed  
13 the Strengthening the Reporting of Observational Studies in Epidemiology (STROBE)  
14 reporting guideline.

15           The details of the KCHF study design and patient enrolment are described  
16 elsewhere.[8–11] Briefly, we enrolled all patients with ADHF, as defined by the modified  
17 Framingham criteria, who were admitted to the participating hospitals and patients who

1  
2  
3  
4 1 underwent heart failure-specific treatment involving intravenous drugs within 24 hours after  
5  
6  
7  
8 2 hospital presentation. Patient records were anonymized before analysis. Data analysis was  
9  
10  
11 3 conducted from August 2018 to October 2018.  
12  
13

14 4 Among 4056 patients enrolled in the KCHF registry, 3785 patients were discharged  
15  
16  
17 5 alive after hospitalization for ADHF. Clinical follow-up data were collected in October 2017.  
18  
19  
20  
21 6 The attending physicians or research assistants at each participating hospital collected clinical  
22  
23  
24 7 events after the index hospitalization from hospital charts or by contacting patients, their  
25  
26  
27  
28 8 relatives, or their referring physicians with consent. The present analysis had 2 objectives.  
29  
30  
31 9 First, we sought to clarify the risk factors for functional decline during hospitalization of  
32  
33  
34 10 ADHF patients. Second, we sought to compare the 1-year clinical outcomes between the 2  
35  
36  
37  
38 11 groups of patients with and without functional decline during the hospitalization for ADHF.  
39  
40  
41 12 Among 4056 patients enrolled in the KCHF registry, the current study population consisted  
42  
43  
44 13 of 3555 patients who were discharged alive and were assessed for functional decline during  
45  
46  
47  
48 14 hospitalization, excluding 271 patients who died during the index hospitalization, 99 patients  
49  
50  
51 15 whose functional status before admission and/or at discharge was not available, and 131  
52  
53  
54 16 patients who were bedridden before index hospitalization (Figure 1). The long-term follow-  
55  
56  
57  
58 17 up was censored at 1-year. The primary outcome measure in the current analysis was a  
59  
60

1  
2  
3  
4 1 composite of all-cause death or heart failure hospitalization at 1-year. The secondary outcome  
5  
6  
7  
8 2 measures were all-cause death, heart failure hospitalization, and a composite of all-cause  
9  
10  
11 3 death or all-cause hospitalization at 1-year.  
12  
13

#### 14 **Definitions**

15  
16  
17 5 Physical activity before admission and at discharge was classified by mobility  
18  
19  
20  
21 6 status based on the definition of Japanese long-term care insurance into ambulatory  
22  
23  
24 7 (including those patients using any aid such as stick), use of wheelchair outdoor only, use of  
25  
26  
27  
28 8 wheelchair indoor and outdoor, and bedridden state.[8] Functional decline was defined as the  
29  
30  
31 9 decline of at least one stage on physical activity at discharge compared with pre-admission  
32  
33  
34 10 status. In-hospital worsening heart failure was defined as additional intravenous drug  
35  
36  
37  
38 11 administration for heart failure, haemodialysis, or mechanical circulatory or respiratory  
39  
40  
41 12 support, occurring >24 hours after therapy initiation.[12] In-hospital worsening renal function  
42  
43  
44 13 was defined as >0.3 mg/dL increase in serum creatinine levels during the index  
45  
46  
47  
48 14 hospitalization.[13–15] Detailed definitions of baseline clinical characteristics including the  
49  
50  
51 15 signs and symptoms of heart failure were described previously.[9] Missing values were  
52  
53  
54 16 presented in eTable 1.  
55  
56

#### 57 **Statistical Analysis**



1  
2  
3  
4 1 Categorical variables were presented as numbers with percentages and compared  
5  
6  
7  
8 2 using  $\chi^2$  test. Continuous variables were expressed as the mean with standard deviation or  
9  
10  
11 3 median with 25th to 75th percentiles, and compared using the Student's *t* test when normally  
12  
13  
14 4 distributed or Wilcoxon rank-sum test when not normally distributed.  
15  
16

17  
18 5 We compared baseline characteristics and clinical outcomes based on the presence  
19  
20  
21 6 or absence of functional decline during the index hospitalization. A multivariable logistic  
22  
23  
24 7 regression model was developed to identify clinical characteristics associated with an  
25  
26  
27  
28 8 increased risk for functional decline. We used 23 clinically relevant factors listed in Table 1  
29  
30  
31 9 as potential independent risk factors in multivariable logistic regression models and estimated  
32  
33  
34 10 the odd ratios (ORs) and 95% confidence intervals (CIs). We used the Kaplan-Meier method  
35  
36  
37  
38 11 to estimate the cumulative 1-year incidences of the outcome measures and assessed the  
39  
40  
41 12 differences with the log-rank test. We expressed the associations of the functional decline  
42  
43  
44 13 group with the no functional decline group for all outcome measures as hazard ratios (HRs)  
45  
46  
47  
48 14 with 95% CIs by multivariable Cox proportional hazard models incorporating 29 clinically  
49  
50  
51 15 relevant risk-adjusting variables indicated in Table 1. We also conducted subgroup analyses  
52  
53  
54 16 stratified by age, sex, LVEF, anaemia, albumin levels, body temperature, and the  
55  
56  
57  
58 17 symptomatic status at discharge (oedema and general malaise at discharge). In the  
59  
60

1 multivariable analysis and subgroup analyses, continuous variables were dichotomized by  
2 clinically meaningful reference values or median values; age  $\geq 80$  years based on the median  
3 value, LVEF  $< 40\%$  based on the heart failure guideline of LVEF classification [16], BMI  
4  $\leq 22$  kg/m<sup>2</sup>, renal dysfunction (eGFR  $< 30$  ml/min/1.73m<sup>2</sup>) based on CKD grade, decreased  
5 albumin levels (serum albumin  $< 3.0$  g/dL), hyponatremia (serum sodium  $< 135$  mEq/L),  
6 elevated body temperature (body temperature  $\geq 37.5^\circ\text{C}$ ) based on the cut-off value in  
7 metabolic syndrome [17].

8 We performed an additional analysis using the data including those patients who  
9 died during the index hospitalization and those who were bedridden before the index  
10 hospitalization, and evaluated the factors associated with functional decline or in-hospital  
11 mortality by constructing the multivariable adjusted Cox models. All statistical analyses were  
12 conducted by a physician (H.Y.) and a statistician (T.M.) with JMP 13.0 or SAS 9.4 (both  
13 SAS Institute Inc, Cary, NC). Two-tailed P-values less than 0.05 were considered statistically  
14 significant.

#### 15 **Patient and public involvement**

16 No patient involved.

17

## 1 **Results**

### 2 **Baseline Clinical Characteristics**

3           Among 3555 study patients, physical activity before admission included  
4 ambulatory in 2949 patients (83%), wheelchair outdoor only in 272 patients (7.7%), and  
5 wheelchair outdoor and indoor in 334 patients (9.4%). At hospital discharge, functional  
6 decline was observed in 420 patients (14%) who were ambulatory before admission, in 80  
7 patients (29%) who had used wheelchair outdoor only, and in 28 patients (8.4%) who had  
8 used wheelchair outdoor and indoor. Consequently, decline in functional status was observed  
9 in 528 patients (15%; functional decline group), while functional decline was not observed in  
10 3027 patients (85%; no functional decline group) (eFigure 1). Wheelchair outdoor only  
11 before admission were more prevalent in the functional decline group than in the no  
12 functional decline group; however, 80% of patients in the functional decline group were  
13 ambulatory before admission (Table 1).

14           Regarding the baseline clinical characteristics, the patients in the functional decline  
15 group were older and had a higher prevalence of hypertension, prior stroke, renal  
16 dysfunction, dementia, malignancy, anaemia, decreased albumin levels, and hyponatremia  
17 (Table 1). There were no significant differences in previous heart failure hospitalization,

1 atrial fibrillation or flutter, previous myocardial infarction, chronic lung disease, and living  
2 alone status as a social background between the 2 groups (Table 1). The functional decline  
3 group was more likely to have a valvular aetiology, lower blood pressure, lower heart rate,  
4 higher levels of brain natriuretic peptide (BNP) or N-terminal portion of proBNP (NT-  
5 proBNP), and a higher LVEF (Table 1). The proportion of patients who achieved relief of  
6 signs and symptoms on admission after the treatment in the emergency room was not  
7 significantly different between the 2 groups (14% vs. 16%, P=0.25).

#### 8 **Risk Factors for Functional Decline**

9       Among the baseline characteristics and status at hospital presentation, the following  
10 independent risk factors for functional decline during hospitalization were identified by the  
11 multivariable logistic regression analysis: age  $\geq 80$  years (OR 2.56; 95% CI 1.98–3.32),  
12 women (OR 1.27; 95% CI 1.01–1.60), prior stroke (OR 1.61; 95% CI 1.23–2.10), dementia  
13 (OR 1.95; 95% CI 1.52–2.52), elevated body temperature (OR 1.88; 95% CI 1.29–2.74),  
14 hyponatremia (OR 1.46; 95% CI 1.07–1.98), decreased albumin levels (OR 1.69; 95% CI  
15 1.27–2.24), eGFR  $< 30$  ml/min/1.73m<sup>2</sup> (OR 1.54; 95% CI 1.21–1.96), and New York Heart  
16 Association (NYHA) class III or IV on admission (OR 1.51; 95% CI 1.05–2.18) (Figure 2  
17 and eTable 2).

## 1 **In-hospital adverse events and status at discharge**

2           The median length of hospital stay was longer in the functional decline group than  
3 in the no functional decline group (21 days vs. 15 days,  $P < 0.001$ ). Regarding the in-hospital  
4 adverse events, the prevalence of worsening heart failure, worsening renal function, and  
5 stroke was higher in the functional decline group than in the no functional decline group  
6 (Table 2). The proportion of patients with symptoms such as oedema and general malaise at  
7 discharge was higher in the functional decline group than in the no functional decline group  
8 (Table 1). Consequently, the proportion of patients in the functional decline group discharged  
9 to home was also lower (47% vs. 90%,  $P < 0.001$ ). Regarding medical treatment at discharge,  
10 angiotensin-converting enzyme inhibitor or angiotensin receptor blocker (ACEI or ARB), and  
11 beta blocker were less often prescribed in the functional decline group than in the no  
12 functional decline group (Table 1).

## 13 **Long-term outcomes: functional decline vs. no functional decline groups**

14           Follow-up rate at 1-year was 96%. The cumulative 1-year incidence of the primary  
15 outcome measure (a composite of all-cause death or heart failure hospitalization) in the  
16 functional decline group was significantly higher than that in the no functional decline group  
17 (49% vs. 31%, log-rank  $P < 0.001$ ) (Figure 3). After adjusting for baseline characteristics, the

1  
2  
3  
4 1 higher risk of the functional decline group relative to the no functional decline group  
5  
6  
7  
8 2 remained significant (adjusted HR, 1.39; 95%CI, 1.18–1.62;  $P<0.001$ ) (Figure 3 and eTable  
9  
10  
11 3). The cumulative 1-year incidence of all-cause death was also significantly higher in the  
12  
13  
14 4 functional decline group than in the no functional decline group. Even after adjusting  
15  
16  
17 5 confounders, the excess mortality risk of the functional decline group relative to the no  
18  
19  
20  
21 6 functional decline group remained significant (Figure 3 and eTable 3). The cumulative 1-year  
22  
23  
24 7 incidence of heart failure hospitalization was also significantly higher in the functional  
25  
26  
27  
28 8 decline group than in the no functional decline group. However, the adjusted risk of the  
29  
30  
31 9 functional decline group relative to the no functional decline group for heart failure  
32  
33  
34 10 hospitalization was no longer significant (Figure 3 and eTable 3). The cumulative 1-year  
35  
36  
37  
38 11 incidence of a composite of all-cause death or all-cause hospitalization was significantly  
39  
40  
41 12 higher in the functional decline group than in the no functional decline group. After adjusting  
42  
43  
44 13 confounders, the higher risk of the functional decline group relative to the no functional  
45  
46  
47  
48 14 decline group remained significant (Figure 3 and eTable 3). In the subgroup analyses, there  
49  
50  
51 15 were no interactions between those subgroup factors and the association of functional decline  
52  
53  
54 16 with the primary outcome measure (eFigure 2).

57 **Additional analysis on the risk factors for functional decline or in-hospital mortality**  
58  
59  
60

1  
2  
3  
4 1 The risk factors for functional decline or in-hospital mortality in a total of 4056  
5  
6  
7  
8 2 patients were similar to the risk factors for functional decline. LVEF <40% (OR, 1.23; 95%  
9  
10  
11 3 CI, 1.00–1.52) and acute coronary syndrome (OR, 1.73; 95% CI, 1.17–2.56) that were not  
12  
13  
14 4 included in the risk factors for functional decline emerged as the risk factors for functional  
15  
16  
17 5 decline or in-hospital mortality. Meanwhile, among the risk factors for functional decline,  
18  
19  
20  
21 6 women (OR, 1.10; 95% CI, 0.90–1.34) was not included in the risk factors for functional  
22  
23  
24 7 decline or in-hospital mortality (Figure 2 and eTable 2).  
25  
26  
27  
28 8  
29  
30

## 31 **Discussion**

32  
33  
34 10 The main findings of the present study investigating the prevalence and risk factors  
35  
36  
37 11 of functional decline during hospitalization, and its relationship with post-discharge outcomes  
38  
39  
40  
41 12 in patients with ADHF hospitalization were as follows; 1) Functional decline during ADHF  
42  
43  
44 13 hospitalization occurred in 15% of patients, and 80% of those with functional decline were  
45  
46  
47 14 ambulatory before admission; 2) The independent baseline risk factors associated with  
48  
49  
50  
51 15 functional decline included age  $\geq 80$  years, women, prior stroke, dementia, elevated body  
52  
53  
54 16 temperature, hyponatremia, decreased albumin levels, eGFR <30 ml/min/1.73m<sup>2</sup>, and NYHA  
55  
56  
57 17 class III or IV; 3) Functional decline during the index hospitalization was associated with  
58  
59  
60

1 higher long-term risk for a composite of all-cause death or heart failure hospitalization.

2  
3  
4  
5  
6  
7  
8 2 This is the first large-scale contemporary multicentre study reporting the  
9  
10  
11 3 prevalence of functional decline in patients hospitalized for ADHF. Of note, we identified the  
12  
13  
14 4 severity of symptoms or patient status specific for heart failure was associated with functional  
15  
16  
17  
18 5 decline independent of well-known factors in acute medical illness [18–20]. Functional  
19  
20  
21 6 decline is an inevitable consequence in aged people, but hospitalization accelerates the  
22  
23  
24 7 decline [20–22]. Functional declines have been found to be related not only to impairment of  
25  
26  
27  
28 8 independence and quality of life (QOL), but also to increased health service use, higher risk  
29  
30  
31 9 for institutionalization, and higher risk for mortality [23–27]. Indeed, in the present study, the  
32  
33  
34 10 proportion of patients discharged to home was lower in the functional decline group than in  
35  
36  
37  
38 11 the no functional decline group, suggesting impaired QOL after discharge. Also, the long-  
39  
40  
41 12 term mortality was worse in the functional decline group than in the no functional decline  
42  
43  
44 13 group. Therefore, it is important to recognize risk factors of functional decline. In previous  
45  
46  
47  
48 14 studies of hospitalized patients with acute medical illness, the predictors of functional decline  
49  
50  
51 15 in hospitalized elderly patients were older age, admission diagnosis, lower functional status,  
52  
53  
54 16 impaired cognitive status, comorbidities, and length of hospital stay.[18–20] These findings  
55  
56  
57  
58 17 were confirmed in the setting of ADHF in our present study. In addition, findings specific for  
59  
60



1  
2  
3  
4 1 ADHF such as the dyspnoea or hyponatremia was associated with functional decline, which  
5  
6  
7  
8 2 were also reported to be the risk factors for in-hospital mortality in ADHF [28]. The  
9  
10  
11 3 prevalence of oedema and general malaise at discharge was higher in the functional decline  
12  
13  
14 4 group. Early achievement of successful ADHF treatment might reduce the risk of functional  
15  
16  
17 5 decline, although the present observational study could not address the cause-effect  
18  
19  
20  
21 6 relationship between the functional decline and the symptomatic status at discharge.  
22  
23

24 7           There might be several possible strategies to prevent functional decline during  
25  
26  
27 8 ADHF hospitalization. The first is the early improvement of hemodynamic status to avoid  
28  
29  
30  
31 9 worsening heart failure. The prevalence of worsening heart failure was higher in the  
32  
33  
34 10 functional decline group. As functional decline associated with hospitalization begins within  
35  
36  
37  
38 11 48 hours of admission, early improvement of heart failure to reduce the incidence of  
39  
40  
41 12 hospitalization-associated disability is one of the main goals of care.[28] Second, it would be  
42  
43  
44 13 important to be adequately aware high-risk patients to make aggressive intervention for  
45  
46  
47  
48 14 preventing functional decline. We identified the risk factors among the baseline  
49  
50  
51 15 characteristics in ADHF patients. In addition, the adverse events during hospitalization may  
52  
53  
54 16 be tightly related to the functional decline. Stroke is one of causes of functional decline and  
55  
56  
57  
58 17 observed in 5.1% of patients with functional decline. Third, a strategy for the prevention of  
59  
60

1  
2  
3  
4 1 functional decline might be the seamless rehabilitation and comprehensive geriatric  
5  
6  
7  
8 2 management through a multidisciplinary team approach.[29–32] In addition, the subgroup  
9  
10  
11 3 analysis showed that there were no interactions between those subgroup factors and the  
12  
13  
14 4 association of functional decline with the primary outcome measure. Thus, prevention of  
15  
16  
17 5 functional decline would have an impact on improving outcomes in all of the patients with  
18  
19  
20  
21 6 ADHF. One possible strategy could be immediate, tailored physical function rehabilitation  
22  
23  
24 7 during and after heart failure hospitalization.[33]

## 8 **Limitations**

9           This study has several limitations. First, we adopted simple classification of  
10 functional status as ambulatory, use of wheelchair outdoor only, use of wheelchair indoor and  
11 outdoor, and bedridden state based on the definition of Japanese long-term care insurance.  
12 The categorization scheme is an easy to understand but coarse measure with very large  
13 gradations inherent in each single stage and therefore very likely substantially underestimated  
14 the prevalence of meaningful functional decline. Second, we did not collect data regarding  
15 on-site and outpatient rehabilitation and nutritional support. However, a team-based approach  
16 for heart failure patients was adapted in all the participating centres in the present study.  
17 Third, we did not include the status at discharge or adverse in-hospital events in the analysis

1 for the risk factor for functional decline, because the cause-effect relationship was not clear.

2 Fourth, data on post-discharge medication and change of functional status after discharge

3 from the index hospitalization were not collected, and not analysed in the analysis for the

4 long-term outcomes. Fifth, as with any observational study, the possibility of selection bias

5 and residual confounding cannot be excluded, although we adjusted for 29 variables as most

6 conceivable confounders.

## 7 **Conclusions**

8 Independent risk factors of functional decline in ADHF patients were related to

9 both frailty and severity of heart failure. Functional decline during ADHF hospitalization was

10 associated with unfavourable post-discharge outcomes.

## 1 **Acknowledgment**

2 We gratefully acknowledge the contributions from KCHF study investigators (Hidenori  
3 Yaku, MD; Takao Kato, MD; Neiko Ozasa, MD; Erika Yamamoto, MD; Yusuke Yoshikawa,  
4 MD; Tetsuo Shioi, MD; Koichiro Kuwahara, MD; Takeshi Kimura, MD, at Kyoto University  
5 Hospital, Kyoto, Japan, Moritake Iguchi, MD; Yugo Yamashita, MD, Masaharu Akao, MD,  
6 at National Hospital Organization Kyoto Medical Centre, Kyoto, Japan, Masashi Kato, MD;  
7 Shinji Miki, MD, at Mitsubishi Kyoto Hospital, Kyoto, Japan, Mamoru Takahashi, MD, at  
8 Shimabara Hospital, Kyoto, Japan, Tsuneaki Kawashima, MD; Takafumi Yagi, MD, at  
9 Okamoto Memorial Hospital, Toshikazu Jinnai, MD; Takashi Konishi, MD, at Japanese Red  
10 Cross Otsu Hospital, Otsu, Japan, Yasutaka Inuzuka, MD; Shigeru Ikeguchi, MD, at Shiga  
11 General Hospital, Moriyama, Japan, Tomoyuki Ikeda, MD; Yoshihiro Himura, MD, at  
12 Hikone Municipal Hospital, Hikone, Japan, Kazuya Nagao, MD; Tsukasa Inada, MD, at  
13 Osaka Red Cross Hospital, Osaka, Japan, Kenichi Sasaki, MD; Moriaki Inoko, MD, at Kitano  
14 Hospital, Osaka, Japan, Takafumi Kawai, MD; Tomoki Sasa, MD; Mitsuo Matsuda, MD, at  
15 Kishiwada City Hospital, Kishiwada, Japan, Akihiro Komasa, MD; Katsuhisa Ishii, MD, at  
16 Kansai Electric Power Hospital, Osaka, Japan, Yodo Tamaki, MD; Yoshihisa Nakagawa,  
17 MD, at Tenri Hospital, Tenri, Japan, Ryoji Taniguchi, MD; Yukihito Sato, MD; Yoshiki

1 Takatsu, MD, at Hyogo Prefectural Amagasaki General Medical Centre, Amagasaki, Japan,  
2  
3  
4  
5  
6  
7  
8 2 Takeshi Kitai, MD;, Ryouyusuke Murai, MD; Yutaka Furukawa, MD, at Kobe City Medical  
9  
10  
11 3 Centre General Hospital, Kobe, Japan, Mitsunori Kawato, MD, at Kobe City Nishi-Kobe  
12  
13  
14 4 Medical Centre, Kobe, Japan, Yasuyo Motohashi, MD; Kanae Su, MD; Mamoru Toyofuku,  
15  
16  
17 5 MD; Takashi Tamura, MD, at Japanese Red Cross Wakayama Medical Centre, Wakayama,  
18  
19  
20  
21 6 Japan, Reiko Hozo, MD; Ryusuke Nishikawa, MD; Hiroki Sakamoto, MD, at Shizuoka  
22  
23  
24 7 General Hospital, Shizuoka, Japan, Yuichi Kawase, MD; Keiichiro Iwasaki, MD; Kazushige  
25  
26  
27 8 Kadota, MD, at Kurashiki Central Hospital, Kurashiki, Japan, and Takashi Morinaga, MD;  
28  
29  
30  
31 9 Yohei Kobayashi, MD; Kenji Ando, MD, at Kokura Memorial Hospital, Kokura, Japan.).  
32  
33

#### 34 **Sources of Funding**

35  
36  
37 11 This study is supported by a grant from the Japan Agency for Medical Research and  
38  
39  
40  
41 12 Development (18059186) to TK, KK, NO. The founder had no role in the study design,  
42  
43  
44 13 collection, analysis or interpretation of the data, writing the manuscript, or the decision to  
45  
46  
47 14 submit the paper for publication.  
48  
49

#### 50 51 **Disclosures**

52  
53  
54 16 None  
55

#### 56 57 **Author Contributions**

- 1  
2  
3  
4 1 Drs Yaku and T. Kato had full access to all of the data in the study and take responsibility for  
5  
6  
7  
8 2 the integrity of the data and the accuracy of the data analysis.  
9  
10  
11 3 Concept and design: Yaku, T. Kato, Morimoto, Tamaki, Ozasa, Yamamoto, Kitai, M. Kato,  
12  
13  
14 4 Kimura.  
15  
16  
17 5 Acquisition, analysis, or interpretation of data: Yaku, T. Kato, Morimoto, Inuzuka, Tamaki,  
18  
19  
20 6 Yoshikawa, Ikeda, Furukawa, Kuwahara.  
21  
22  
23  
24 7 Drafting of the manuscript: Yaku, T. Kato, Kimura.  
25  
26  
27 8 Critical revision of the manuscript for important intellectual content: Yaku, T. Kato,  
28  
29  
30 9 Morimoto, Inuzuka, Tamaki, Yamamoto, Yoshikawa, Kitai, Kuwahara, Kimura.  
31  
32  
33  
34 10 Statistical analysis: Yaku, T. Kato, Morimoto.  
35  
36  
37 11 Administrative, technical, or material support: T. Kato, Sato, Kimura.  
38  
39  
40  
41 12 Supervision: Inuzuka, Ozasa, Kitai, Furukawa, Nakagawa, Sato, Kuwahara, Kimura.  
42  
43  
44 13 **Ethics approval**  
45  
46  
47 14 The study was approved by the Institutional Review Boards of Kyoto University Graduate  
48  
49  
50 15 School of Medicine (approval number: E2311), Shiga General Hospital (approval number:  
51  
52  
53 16 20141120-01), Tenri Hospital (approval number: 640), Kobe City Medical Centre General  
54  
55  
56 17 Hospital (approval number: 14094), Hyogo Prefectural Amagasaki General Medical Centre  
57  
58  
59  
60

1 (approval number: Rinri 26-32), National Hospital Organization Kyoto Medical Centre  
2  
3  
4  
5  
6  
7  
8 2 (approval number:14-080), Mitsubishi Kyoto Hospital (approved 11/12/2014 ), Okamoto  
9  
10  
11 3 Memorial Hospital (approval number: 201503), Japanese Red Cross Otsu Hospital (approval  
12  
13  
14 4 number: 318), Hikone Municipal Hospital (approval number: 26-17), Japanese Red Cross  
15  
16  
17 5 Osaka Hospital (approval number: 392), Shimabara Hospital (approval number: E2311),  
18  
19  
20  
21 6 Kishiwada City Hospital (approval number:12), Kansai Electric Power Hospital (approval  
22  
23  
24 7 number: 26-59), Shizuoka General Hospital (approval number: Rin14-11-47), Kurashiki  
25  
26  
27 8 Central Hospital (approval number: 1719), Kokura Memorial Hospital (approval number:  
28  
29  
30  
31 9 14111202), Kitano Hospital (approval number: P14-11-012), and Japanese Red Cross  
32  
33  
34 10 Wakayama Medical Centre (approval number: 328).  
35  
36

### 37 **Data sharing**

38  
39  
40  
41 12 All data relevant to the study are included in the article or uploaded as supplementary  
42  
43  
44 13 information. No additional data available.  
45  
46  
47  
48 14

1  
2  
3  
4 **1 References**  
5  
6  
7

- 8 2 1 Manton KG. A longitudinal study of functional change and mortality in the United  
9  
10 States. *J Gerontol* 1988;**43**:S153-61.<http://www.ncbi.nlm.nih.gov/pubmed/2971088>  
11 3  
12  
13  
14 4 2 Boyd CM, Ricks M, Fried LP, *et al.* Functional decline and recovery of activities of  
15  
16 daily living in hospitalized, disabled older women: the Women's Health and Aging  
17 5  
18 Study I. *J Am Geriatr Soc* 2009;**57**:1757–66. doi:10.1111/j.1532-5415.2009.02455.x  
19 6  
20  
21  
22  
23  
24 7 3 Guralnik JM, Alexih L, Branch LG. Medical and Long-Term Care Costs When Older  
25  
26 Persons Become More Dependent Intentional Weight Loss and 13-Year Diabetes  
27 8  
28 Incidence in Overweight Adults. *Am J Public Health* 2002;**92**:1244–5.  
29 9  
30  
31  
32  
33  
34 10 4 Gill TM, Allore HG, Holford TR, *et al.* Hospitalization, restricted activity, and the  
35  
36 development of disability among older persons. *J Am Med Assoc* 2004;**292**:2115–24.  
37 11  
38  
39  
40  
41 12  
42  
43  
44 13 5 Sager MA, Franke T, Inouye SK, *et al.* Functional outcomes of acute medical illness  
45  
46 and hospitalization in older persons. *Arch Intern Med* 1996;**156**:645–  
47 14  
48  
49  
50  
51 15  
52  
53  
54 16 6 Ministry of Education, Culture, Sports, Science and Technology Ministry of Health L  
55  
56 and W. Japan's ethical guidelines for epidemiologic research.  
57 17  
58  
59  
60



- 1  
2  
3  
4 1 2002.[http://www.lifescience.mext.go.jp/files/pdf/n796\\_01.pdf](http://www.lifescience.mext.go.jp/files/pdf/n796_01.pdf)  
5  
6  
7  
8 2 7 45 Code of Federal Regulations 46.116(d). 2009;:4–  
9  
10  
11 3 [5.https://www.hhs.gov/ohrp/regulations-and-policy/regulations/45-cfr-](https://www.hhs.gov/ohrp/regulations-and-policy/regulations/45-cfr-)  
12  
13  
14 4 [46/index.html#46.116](https://www.hhs.gov/ohrp/regulations-and-policy/regulations/45-cfr-46/index.html#46.116)  
15  
16  
17 5 8 Yamamoto E, Kato T, Ozasa N, *et al.* Kyoto Congestive Heart Failure (KCHF) study:  
18  
19  
20  
21 6 rationale and design. *ESC Hear Fail* 2017;**4**:216–23. doi:10.1002/ehf2.12138  
22  
23  
24 7 9 Yaku H, Ozasa N, Morimoto T, *et al.* Demographics, Management, and In-Hospital  
25  
26  
27  
28 8 Outcome of Hospitalized Acute Heart Failure Syndrome Patients in Contemporary  
29  
30  
31 9 Real Clinical Practice in Japan - Observations From the Prospective, Multicenter  
32  
33  
34 10 Kyoto Congestive Heart Failure (KCHF) Registry. *Circ J* 2018;**82**:2811–9.  
35  
36  
37 11 doi:10.1253/circj.CJ-17-1386  
38  
39  
40  
41 12 10 Yaku H, Kato T, Morimoto T, *et al.* Association of Mineralocorticoid Receptor  
42  
43  
44 13 Antagonist Use with All-Cause Mortality and Hospital Readmission in Older Adults  
45  
46  
47  
48 14 with Acute Decompensated Heart Failure. *JAMA Netw Open* 2019;**2**:1–14.  
49  
50  
51 15 doi:10.1001/jamanetworkopen.2019.5892  
52  
53  
54 16 11 Su K, Kato T, Toyofuku M, *et al.* Association of Previous Hospitalization for Heart  
55  
56  
57  
58 17 Failure With Increased Mortality in Patients Hospitalized for Acute Decompensated  
59  
60

- 1  
2  
3  
4 1 Heart Failure. *Circ Reports* 2019;**1**:517–24. doi:10.1253/circrep.CR-19-0054  
5  
6  
7  
8 2 12 Butler J, Gheorghiade M, Kelkar A, *et al.* In-hospital worsening heart failure. *Eur J*  
9  
10  
11 3 *Heart Fail* 2015;**17**:1104–13. doi:10.1002/ejhf.333  
12  
13  
14 4 13 Filippatos G, Farmakis D, Parissis J. Renal dysfunction and heart failure: Things are  
15  
16  
17 5 seldom what they seem. *Eur Heart J* 2014;**35**:416–8. doi:10.1093/eurheartj/ehf515  
18  
19  
20  
21 6 14 Vardeny O, Wu DH, Desai A, *et al.* Influence of baseline and worsening renal function  
22  
23  
24 7 on efficacy of spironolactone in patients with severe heart failure: Insights from rales  
25  
26  
27 8 (randomized aldactone evaluation study). *J Am Coll Cardiol* 2012;**60**:2082–9.  
28  
29  
30 9 doi:10.1016/j.jacc.2012.07.048  
31  
32  
33  
34 10 15 Clark H, Krum H, Hopper I. Worsening renal function during renin-angiotensin-  
35  
36  
37 11 aldosterone system inhibitor initiation and long-term outcomes in patients with left  
38  
39  
40  
41 12 ventricular systolic dysfunction. *Eur J Heart Fail* 2014;**16**:41–  
42  
43  
44 13 8.[http://www.embase.com/search/results?subaction=viewrecord&from=export&id=L3](http://www.embase.com/search/results?subaction=viewrecord&from=export&id=L372684240%5Cnhttp://dx.doi.org/10.1002/ejhf.13)  
45  
46  
47 14 [72684240%5Cnhttp://dx.doi.org/10.1002/ejhf.13](http://dx.doi.org/10.1002/ejhf.13)  
48  
49  
50  
51 15 16 Ponikowski P, Voors AA, Anker SD, *et al.* 2016 ESC Guidelines for the diagnosis and  
52  
53  
54 16 treatment of acute and chronic heart failure: The Task Force for the diagnosis and  
55  
56  
57 17 treatment of acute and chronic heart failure of the European Society of Cardiology  
58  
59  
60

- 1  
2  
3  
4 1 (ESC). Developed with the special contribution . *Eur J Heart Fail* 2016;**18**:891–975.  
5  
6  
7  
8 2 doi:10.1002/ejhf.592  
9  
10  
11 3 17 Oda E, Oohara K, Abe A, *et al*. The optimal cut-off point of C-reactive protein as an  
12  
13  
14 4 optional component of metabolic syndrome in Japan. *Circ J* 2006;**70**:384–8.  
15  
16  
17 5 doi:10.1253/circj.70.384  
18  
19  
20  
21 6 18 Stuck AE, Walthert JM, Nikolaus T, *et al*. Risk factors for functional status decline in  
22  
23  
24 7 community-living elderly people: a systematic literature review. *Soc Sci Med*  
25  
26  
27 8 1999;**48**:445–69. doi:10.1016/S0277-9536(98)00370-0  
28  
29  
30  
31 9 19 McCusker J, Kakuma R, Abrahamowicz M. Predictors of functional decline in  
32  
33  
34 10 hospitalized elderly patients: a systematic review. *J Gerontol A Biol Sci Med Sci*  
35  
36  
37 11 2002;**57**:M569-77.<http://www.ncbi.nlm.nih.gov/pubmed/12196493>  
38  
39  
40  
41 12 20 Covinsky KE, Palmer RM, Fortinsky RH, *et al*. Loss of independence in activities of  
42  
43  
44 13 daily living in older adults hospitalized with medical illnesses: increased vulnerability  
45  
46  
47 14 with age. *J Am Geriatr Soc* 2003;**51**:451–  
48  
49  
50  
51 15 8.<http://www.ncbi.nlm.nih.gov/pubmed/12657063>  
52  
53  
54 16 21 Inouye SK, Bogardus ST, Baker DI, *et al*. The hospital elder life program: A model of  
55  
56  
57 17 care to prevent cognitive and functional decline in older hospitalized patients. *J Am*  
58  
59  
60

- 1  
2  
3  
4 1 *Geriatr Soc* 2000;**48**:1697–706. doi:10.1111/j.1532-5415.2000.tb03885.x
- 5  
6  
7 2 22 Pandharipande PP, Girard TD, Jackson JC, *et al.* Long-term cognitive impairment after  
8  
9  
10  
11 3 critical illness. *N Engl J Med* 2013;**369**:1306–16. doi:10.1056/NEJMoa1301372  
12  
13  
14 4 23 Hirvensalo M, Rantanen T, Heikkinen E. Mobility difficulties and physical activity as  
15  
16  
17 5 predictors of mortality and loss of independence in the community-living older  
18  
19  
20  
21 6 population. *J Am Geriatr Soc* 2000;**48**:493–8. doi:10.1111/j.1532-  
22  
23  
24 7 5415.2000.tb04994.x  
25  
26  
27 8 24 Greiner PA, Snowdon DA, Schmitt FA. The loss of independence in activities of daily  
28  
29  
30 9 living: The role of low normal cognitive function in elderly nuns. *Am J Public Health*  
31  
32  
33  
34 10 1996;**86**:62–6. doi:10.2105/AJPH.86.1.62  
35  
36  
37 11 25 Ganguli M, MPH ES, PhD SB, *et al.* Cognitive Impairment and the Use of Health  
38  
39  
40  
41 12 Services in an Elderly Rural Population: The MoVIES Project. *J Am Geriatr Soc*  
42  
43  
44 13 1993;**41**:1065–70. doi:10.1111/j.1532-5415.1993.tb06453.x  
45  
46  
47 14 26 Barberger-Gateau P, Fabrigoule C. Disability and cognitive impairment in the elderly.  
48  
49  
50  
51 15 *Disabil Rehabil* 1997;**19**:175–93. <http://www.ncbi.nlm.nih.gov/pubmed/9184783>  
52  
53  
54 16 27 Black SA, Rush RD. Cognitive and functional decline in adults aged 75 and older. *J*  
55  
56  
57 17 *Am Geriatr Soc* 2002;**50**:1978–86. doi:10.1046/j.1532-5415.2002.50609.x  
58  
59  
60

- 1  
2  
3  
4 1 28 Hirsch CH, Sommers L, Olsen A, *et al.* The natural history of functional morbidity in  
5  
6  
7  
8 2 hospitalized older patients. *J Am Geriatr Soc* 1990;**38**:1296–  
9  
10  
11 3 303.<http://www.ncbi.nlm.nih.gov/pubmed/2123911>  
12  
13  
14 4 29 O'Connor CM, Whellan DJ, Lee KL, *et al.* Efficacy and safety of exercise training in  
15  
16  
17 5 patients with chronic heart failure: HF-ACTION randomized controlled trial. *JAMA*  
18  
19  
20  
21 6 2009;**301**:1439–50. doi:10.1001/jama.2009.454  
22  
23  
24 7 30 Baztán JJ, Suárez-García FM, López-Arrieta J, *et al.* Effectiveness of acute geriatric  
25  
26  
27 8 units on functional decline, living at home, and case fatality among older patients  
28  
29  
30  
31 9 admitted to hospital for acute medical disorders: Meta-analysis. *BMJ* 2009;**338**:334–6.  
32  
33  
34 10 doi:10.1136/bmj.b50  
35  
36  
37 11 31 Fox MT, Persaud M, Maimets I, *et al.* Effectiveness of acute geriatric unit care using  
38  
39  
40  
41 12 acute care for elders components: A systematic review and meta-analysis. *J Am*  
42  
43  
44 13 *Geriatr Soc* 2012;**60**:2237–45. doi:10.1111/jgs.12028  
45  
46  
47  
48 14 32 Bachmann S, Finger C, Huss A, *et al.* Inpatient rehabilitation specifically designed for  
49  
50  
51 15 geriatric patients: Systematic review and meta-analysis of randomised controlled trials.  
52  
53  
54 16 *BMJ* 2010;**340**:1230. doi:10.1136/bmj.c1718  
55  
56  
57 17 33 Reeves GR, Whellan DJ, Duncan P, *et al.* Rehabilitation Therapy in Older Acute Heart  
58  
59  
60

1  
2  
3  
4  
5  
6  
7  
8  
9  
10  
11  
12  
13  
14  
15  
16  
17  
18  
19  
20  
21  
22  
23  
24  
25  
26  
27  
28  
29  
30  
31  
32  
33  
34  
35  
36  
37  
38  
39  
40  
41  
42  
43  
44  
45  
46  
47  
48  
49  
50  
51  
52  
53  
54  
55  
56  
57  
58  
59  
60

1 Failure Patients (REHAB-HF) trial: Design and rationale. *Am Heart J* 2017;**185**:130–

2 9. doi:10.1016/j.ahj.2016.12.012

3

4

For peer review only

1  
2  
3  
4 **1 Figure legends**  
5

6  
7  
8 **2 Figure 1. Patient flowchart.** KCHF=Kyoto Congestive Heart Failure, ADHF=acute  
9  
10  
11 decompensated heart failure.  
12

13  
14 **4 Figure 2. Clinical factors associated with functional decline during hospitalization in the**  
15  
16  
17 **5 univariate and multivariable logistic regression models.** BMI=body mass index, LVEF=left  
18  
19  
20  
21  
22  
23  
24  
25  
26  
27  
28  
29  
30  
31  
32  
33  
34  
35  
36  
37  
38  
39  
40  
41  
42  
43  
44  
45  
46  
47  
48  
49  
50  
51  
52  
53  
54  
55  
56  
57  
58  
59  
60  
6  
7  
8  
9  
10  
11  
12  
ventricular ejection, HF=heart failure, eGFR=estimated glomerular filtration rate, BP=blood  
pressure, NYHA=New York Heart Association, OR=odds ratio, CI=confidence interval.

8  
9  
10  
11  
12  
13  
14  
15  
16  
17  
18  
19  
20  
21  
22  
23  
24  
25  
26  
27  
28  
29  
30  
31  
32  
33  
34  
35  
36  
37  
38  
39  
40  
41  
42  
43  
44  
45  
46  
47  
48  
49  
50  
51  
52  
53  
54  
55  
56  
57  
58  
59  
60  
8  
9  
10  
11  
12  
**8 Figure 3. The Cumulative incidences for the primary outcome measure (A), for all-  
9 cause death (B), for HF hospitalization (C), and for a composite of all-cause death or all-  
10 cause hospitalization (D) according to the presence or absence of functional decline.**  
11  
12  
HF=heart failure, HR=hazard ratio, CI=confidence interval.

**Table 1. Patient Characteristics**

|                                        | Functional<br>decline | No functional<br>decline | P value |
|----------------------------------------|-----------------------|--------------------------|---------|
|                                        | N=528                 | N=3027                   |         |
| Clinical characteristics               |                       |                          |         |
| Age, years                             | 85 [80–89]            | 79 [70–85]               | <0.001  |
| Age ≥80 years*†                        | 399 (76)              | 1407 (46)                | <0.001  |
| Women*†                                | 294 (56)              | 1278 (42)                | <0.001  |
| BMI, kg/m <sup>2</sup>                 | 22.0±4.0              | 23.1±4.5                 | <0.001  |
| BMI ≤22 kg/m <sup>2</sup> *†           | 269 (55)              | 1281 (44)                | <0.001  |
| Medical history                        |                       |                          |         |
| Prior heart failure hospitalization*†  | 186 (36)              | 1077 (36)                | 0.92    |
| Atrial fibrillation or flutter         | 220 (42)              | 1263 (42)                | 0.98    |
| Hypertension*†                         | 406 (77)              | 2174 (72)                | 0.02    |
| Diabetes mellitus*†                    | 187 (35)              | 1145 (38)                | 0.29    |
| Prior myocardial infarction*†          | 112 (21)              | 681 (23)                 | 0.51    |
| Prior stroke*†                         | 125 (24)              | 432 (14)                 | <0.001  |
| Current smoking*†                      | 28 (5.5)              | 425 (14)                 | <0.001  |
| Malignancy                             | 97 (18)               | 419 (14)                 | 0.006   |
| Chronic lung disease*†                 | 41 (7.8)              | 247 (8.2)                | 0.76    |
| Dementia*†                             | 175 (33)              | 423 (14)                 | <0.001  |
| Social backgrounds at admission        |                       |                          |         |
| Poor medical adherence                 | 100 (19)              | 498 (16)                 | 0.16    |
| Living alone*†                         | 127 (24)              | 652 (22)                 | 0.20    |
| Public assistance                      | 24 (4.6)              | 186 (6.1)                | 0.14    |
| Functional status before admission     |                       |                          |         |
| Ambulatory                             | 420 (80)              | 2529 (84)                | 0.02    |
| Use of wheelchair [outdoor only]       | 80 (15)               | 192 (6.3)                | <0.001  |
| Use of wheelchair [outdoor and indoor] | 28 (5.3)              | 306 (10)                 | <.0001  |
| Origin                                 |                       |                          |         |
| Ischemic                               | 134 (25)              | 820 (27)                 | 0.41    |
| Acute coronary syndrome*†              | 36 (6.8)              | 166 (5.5)                | 0.22    |
| Hypertensive                           | 131 (25)              | 754 (25)                 | 0.96    |



|    |                                          |                |                |        |
|----|------------------------------------------|----------------|----------------|--------|
| 1  |                                          |                |                |        |
| 2  |                                          |                |                |        |
| 3  | Valvular                                 | 124 (23)       | 565 (19)       | <0.001 |
| 4  | Cardiomyopathy                           | 54 (10)        | 492 (16)       | <0.001 |
| 5  |                                          |                |                |        |
| 6  |                                          |                |                |        |
| 7  | Vital signs and symptoms at presentation |                |                |        |
| 8  | BP, mmHg                                 |                |                |        |
| 9  |                                          |                |                |        |
| 10 | Systolic BP                              | 144±32         | 149±35         | 0.003  |
| 11 |                                          |                |                |        |
| 12 | Systolic BP ≥140 mmHg                    | 275 (53)       | 1741 (58)      | 0.03   |
| 13 |                                          |                |                |        |
| 14 | Systolic BP <90 mmHg*†                   | 12 (2.3)       | 76 (2.5)       | 0.76   |
| 15 | Diastolic BP                             | 81±23          | 86±24          | <0.001 |
| 16 |                                          |                |                |        |
| 17 | Heart rate, beat/min                     | 93±27          | 96±28          | 0.001  |
| 18 |                                          |                |                |        |
| 19 | Heart rate <60 beat/min*†                | 44 (8.5)       | 195 (6.5)      | 0.11   |
| 20 | Body temperature, °C                     | 36.6±0.7       | 36.5±0.6       | <0.001 |
| 21 |                                          |                |                |        |
| 22 | Body temperature ≥37.5°C*†               | 58 (11)        | 154 (5.3)      | <0.001 |
| 23 |                                          |                |                |        |
| 24 | Rhythms at presentation                  |                |                |        |
| 25 | Sinus rhythm                             | 280 (53)       | 1715 (57)      | 0.12   |
| 26 |                                          |                |                |        |
| 27 | Atrial fibrillation or flutter*†         | 198 (38)       | 1085 (36)      | 0.47   |
| 28 |                                          |                |                |        |
| 29 | NYHA class III or IV*†                   | 482 (92)       | 2598 (73)      | <0.001 |
| 30 | Tests at admission                       |                |                |        |
| 31 |                                          |                |                |        |
| 32 | LVEF                                     | 48±16          | 46±16          | 0.02   |
| 33 |                                          |                |                |        |
| 34 | HFrEF (EF<40%)*†                         | 167 (32)       | 1148 (38)      | 0.006  |
| 35 |                                          |                |                |        |
| 36 | HFmrEF (EF 40–49%)                       | 117 (22)       | 566 (19)       | 0.06   |
| 37 |                                          |                |                |        |
| 38 | HFpEF (EF ≥50%)                          | 242 (46)       | 1305 (43)      | 0.24   |
| 39 | Haemoglobin, g/dL                        | 11.0±2.1       | 11.7±2.4       | <0.001 |
| 40 |                                          |                |                |        |
| 41 | Anaemia*†‡                               | 401 (76)       | 1946 (64)      | <0.001 |
| 42 | BNP, pg/ml                               | 782 [448–1410] | 687 [375–1214] | <0.001 |
| 43 |                                          |                |                |        |
| 44 | NT-proBNP, pg/ml                         | 10795 [3450–   | 5416 [2629–    | 0.001  |
| 45 |                                          | 18000]         | 11438]         |        |
| 46 |                                          |                |                |        |
| 47 | Creatinine, mg/dL                        | 1.2 [0.8–1.6]  | 1.1 [0.8–1.6]  | 0.21   |
| 48 |                                          |                |                |        |
| 49 | eGFR, ml/min/1.73m <sup>2</sup>          | 38 [24–54]     | 46 [30–62]     | <0.001 |
| 50 |                                          |                |                |        |
| 51 | eGFR <30 ml/min/1.73m <sup>2</sup> *†    | 195 (37)       | 747 (25)       | <0.001 |
| 52 | Blood urea nitrogen, mg/dL               | 28 (20–39)     | 23 (17–33)     | <0.001 |
| 53 |                                          |                |                |        |
| 54 | Albumin, g/dL                            | 3.3±0.5        | 3.5±0.5        | <0.001 |
| 55 |                                          |                |                |        |
| 56 | Albumin <3.0 g/dL*†                      | 112 (22)       | 332 (11)       | <0.001 |
| 57 | Sodium, mEq/L                            | 138±4.7        | 139±4.1        | <0.001 |
| 58 |                                          |                |                |        |
| 59 | Sodium <135 mEq/L*†                      | 83 (16)        | 325 (11)       | 0.001  |
| 60 |                                          |                |                |        |

|                                          |          |           |        |
|------------------------------------------|----------|-----------|--------|
| Potassium, mEq/L                         | 4.3±0.8  | 4.2±0.6   | 0.03   |
| Clinical signs and symptoms at discharge |          |           |        |
| Oedema†                                  | 89 (17)  | 320 (11)  | <0.001 |
| General malaise†                         | 152 (31) | 388 (14)  | <0.001 |
| Medications at discharge                 |          |           |        |
| Number of drugs prescribed               | 8 (6–11) | 9 (6–11)  | 0.12   |
| Loop diuretics†                          | 428 (81) | 2472 (82) | 0.74   |
| ACEI or ARB†                             | 242 (46) | 1838 (61) | <0.001 |
| MRA†                                     | 208 (39) | 1409 (47) | 0.002  |
| Beta blocker†                            | 287 (54) | 2101 (69) | <0.001 |
| Tolvaptan                                | 76 (14)  | 299 (9.9) | 0.002  |
| Functional status at discharge           |          |           |        |
| Ambulatory                               | 0        | 2682 (89) | <0.001 |
| Use of wheelchair [outdoor only]         | 184 (35) | 160 (5.3) | <0.001 |
| Use of wheelchair [outdoor and indoor]   | 261 (49) | 185 (6.1) | <.0001 |
| Bedridden                                | 83 (16)  | 0         | <0.001 |
| Living place after discharge             |          |           |        |
| Home                                     | 247 (47) | 2709 (90) | <0.001 |
| Hospital                                 | 225 (43) | 180 (6.0) | <0.001 |
| Institution for the aged                 | 50 (9.5) | 114 (3.8) | <0.001 |
| Other                                    | 4 (0.8)  | 17 (0.6)  | 0.59   |

Abbreviations: BMI, body mass index; BP, blood pressure; NYHA, New York Heart Association; LVEF, left ventricular ejection fraction; HFrEF, heart failure with reduced ejection fraction; HFmrEF, heart failure with mid-range ejection fraction; HFpEF, heart failure with preserved ejection fraction; BNP, brain-type natriuretic peptide; NT-proBNP, N-terminal-proBNP; eGFR, estimated glomerular filtration rate; ACEI, angiotensin converting enzyme inhibitor; ARB, angiotensin receptor blocker; MRA, mineralocorticoid receptor antagonist.

Continuous variables were presented as mean ± SD or median with [interquartile range]. Categorical variables were presented as number (percentage).

\* Risk-adjusting variables were selected for multivariable logistic regression models.

† Risk-adjusting variables were selected for multivariable Cox proportional hazard models.

‡ Defined by the World Health Organization criteria (haemoglobin <12 g/dL for women and <13 g/dL for men).

**Table 2. In-hospital Management and Outcome**

|                                                               | <b>Functional<br/>decline</b> | <b>No functional<br/>decline</b> | <b>P value</b> |
|---------------------------------------------------------------|-------------------------------|----------------------------------|----------------|
|                                                               | N=528                         | N=3027                           |                |
| In-hospital management                                        |                               |                                  |                |
| Management in the emergency room                              |                               |                                  |                |
| Respiratory management                                        |                               |                                  |                |
| Oxygen inhalation                                             | 295 (56)                      | 1382 (46)                        | <0.001         |
| NIPPV                                                         | 82 (16)                       | 423 (14)                         | 0.35           |
| Intubation                                                    | 11 (2.1)                      | 53 (1.8)                         | 0.60           |
| Intravenous drugs within 24 hours after hospital presentation |                               |                                  |                |
| Inotropes                                                     | 101 (19)                      | 405 (13)                         | <0.001         |
| Furosemide                                                    | 446 (85)                      | 2536 (84)                        | 0.69           |
| In-hospital clinical outcomes                                 |                               |                                  |                |
| In-hospital adverse events                                    |                               |                                  |                |
| Stroke                                                        | 27 (5.1)                      | 26 (0.9)                         | <0.001         |
| Worsening heart failure                                       | 130 (25)                      | 490 (16)                         | <0.001         |
| Worsening renal function                                      | 244 (47)                      | 992 (33)                         | <0.001         |
| In-hospital infection                                         | 104 (20)                      | 258 (8.5)                        | <0.001         |
| Length of stay, day                                           | 21 [14–37]                    | 15 [11–22]                       | <0.001         |

Abbreviations: NIPPV, non-invasive intermittent positive pressure ventilation.

1

**KCHF registry**  
**4056 patients hospitalized with ADHF**  
 (Oct 2014-Mar 2016, 19 centers in Japan)

**In-hospital death during index hospitalization (N=271)**

**Excluded (N=230)**  
 No data about functional status (n = 99)  
 Bedridden before index hospitalization (n = 131)

**Study population:**  
**Patients discharged alive assessed for functional decline during hospitalization**  
**3555 patients**

**Functional decline: 528 patients**

**No functional decline: 3027 patients**

1  
2  
3  
4  
5  
6  
7  
8  
9  
10  
11  
12  
13  
14  
15  
16  
17  
18  
19  
20  
21  
22  
23  
24  
25  
26  
27  
28  
29  
30  
31

| Variables                             | Unadjusted OR (95%CI) | P Value | Adjusted OR (95%CI) | P Value |
|---------------------------------------|-----------------------|---------|---------------------|---------|
| Age ≥80 years                         | 3.56 (2.88–4.40)      | <0.001  | 2.56 (1.98–3.32)    | <0.001  |
| 1 Women                               | 1.72 (1.43–2.07)      | <0.001  | 1.27 (1.01–1.60)    | 0.04    |
| 2 BMI ≤22                             | 1.59 (1.31–1.93)      | <0.001  | 1.20 (0.96–1.50)    | 0.11    |
| 4 LVEF <40%                           | 0.76 (0.62–0.92)      | 0.006   | 1.14 (0.89–1.45)    | 0.29    |
| 5 Prior HF hospitalization            | 0.99 (0.82–1.20)      | 0.92    | 0.82 (0.65–1.04)    | 0.10    |
| 7 Acute coronary syndrome             | 1.26 (0.87–1.83)      | 0.22    | 1.53 (0.97–2.43)    | 0.07    |
| 8 Hypertension                        | 1.31 (1.05–1.62)      | 0.02    | 1.11 (0.85–1.44)    | 0.46    |
| 10 Diabetes mellitus                  | 0.90 (0.74–1.09)      | 0.29    | 1.03 (0.81–1.31)    | 0.81    |
| 11 Atrial fibrillation or flutter     | 1.00 (0.83–1.20)      | 0.98    | 1.02 (0.81–1.29)    | 0.85    |
| 12 Prior myocardial infarction        | 0.93 (0.74–1.16)      | 0.51    | 0.90 (0.69–1.19)    | 0.47    |
| 14 Prior stroke                       | 1.86 (1.49–2.33)      | <0.001  | 1.61 (1.23–2.10)    | <0.001  |
| 15 Chronic lung disease               | 1.07 (0.82–1.40)      | 0.61    | 1.14 (0.83–1.56)    | 0.41    |
| 17 Cognitive dysfunction              | 3.05 (2.48–3.76)      | <0.001  | 1.95 (1.52–2.52)    | <0.001  |
| 18 Current smoking                    | 0.35 (0.23–0.51)      | <0.001  | 0.56 (0.36–0.88)    | 0.01    |
| 20 Living alone                       | 1.15 (0.93–1.43)      | 0.20    | 1.20 (0.93–1.56)    | 0.17    |
| 21 Anemia                             | 1.74 (1.1–2.16)       | <0.001  | 1.10 (0.84–1.44)    | 0.48    |
| 23 Albumin <3.0 g/dL                  | 2.16 (1.71–2.75)      | <0.001  | 1.69 (1.27–2.24)    | <0.001  |
| 24 Sodium <135 mEq/L                  | 1.55 (1.19–2.01)      | 0.001   | 1.46 (1.07–1.98)    | 0.02    |
| 25 eGFR <30 ml/min/1.73m <sup>2</sup> | 1.79 (1.47–2.18)      | <0.001  | 1.54 (1.21–1.96)    | <0.001  |
| 27 Systolic BP <90 mmHg               | 0.91 (0.49–1.68)      | 0.76    | 0.61 (0.26–1.43)    | 0.25    |
| 29 Heart rate <60 beat/min            | 1.33 (0.95–1.87)      | 0.10    | 1.12 (0.75–1.69)    | 0.57    |
| 30 Body temperature ≥37.5 °C          | 2.30 (1.67–3.16)      | <0.001  | 1.88 (1.29–2.74)    | <0.001  |
| 32 NYHA III/IV on admission           | 1.81 (1.30–2.52)      | <0.001  | 1.51 (1.05–2.18)    | 0.03    |

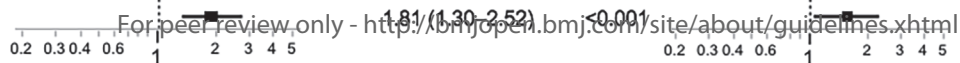

Odds ratio (95%CI)

Odds ratio (95%CI)

For peer review only - <http://bmjopen.bmj.com/site/about/guidelines.xhtml>

Figure 3A

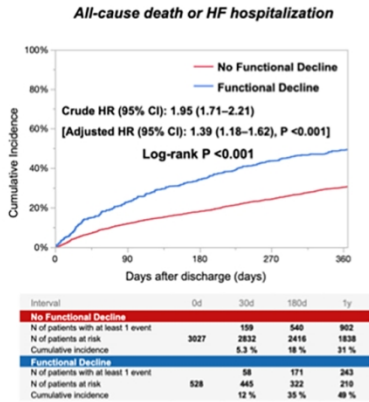

Figure 3B

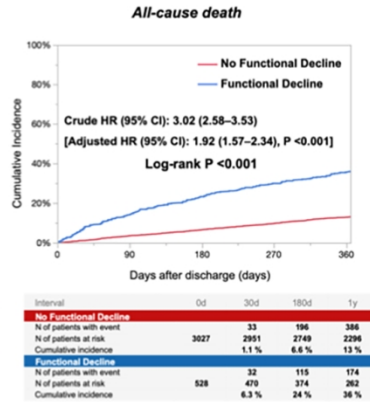

Figure 3C

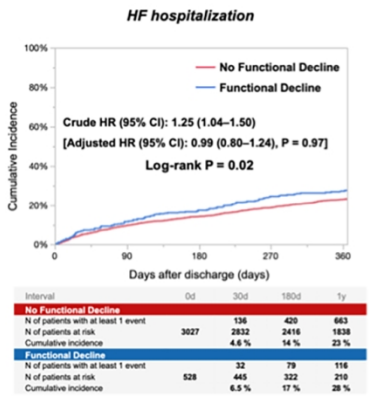

Figure 3D

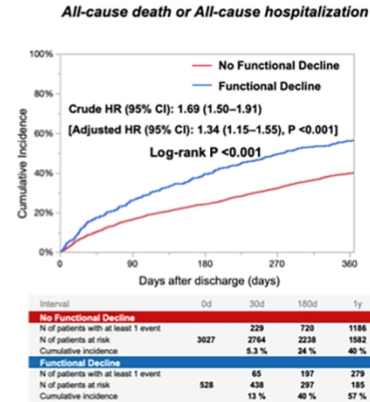

Figure 3. The Cumulative incidences for the primary outcome measure (A), for all-cause death (B), for HF hospitalization (C), and for a composite of all-cause death or all-cause hospitalization (D) according to the presence or absence of functional decline.

99x149mm (300 x 300 DPI)

## Supplementary Online Content

**eTable 1.** Number of missing values in the entire cohort

**eTable 2.** Clinical factors associated with functional decline in the entire cohort in the univariate and multivariable Analyses

**eTable 3.** Clinical outcomes in the entire cohort

**eFigure 1.** The details of functional decline during ADHF Hospitalization.

**eFigure 2.** Subgroup analysis for the association of functional decline with no functional decline on the primary outcome measure.

For peer review only

**eTable 1. Number of missing values in the entire cohort**

|                     | Entire Cohort (N=3555) |          |
|---------------------|------------------------|----------|
|                     | Number                 | Rate (%) |
| Tests at admission  |                        |          |
| BNP or NT-proBNP *  | 46                     | 1.24     |
| Serum creatinine    | 6                      | 0.16     |
| eGFR                | 6                      | 0.16     |
| Blood urea nitrogen | 11                     | 0.30     |
| Albumin             | 110                    | 2.96     |
| Sodium              | 13                     | 0.35     |
| Potassium           | 13                     | 0.35     |
| Haemoglobin         | 6                      | 0.16     |

\* BNP values were reported for 1887 patients in the matched cohort and 3394 patients in the entire cohort; NT-proBNP values were reported for 181 patients in the matched cohort and 323 patients in the entire cohort.  
Abbreviation: BNP, brain-type natriuretic peptide; NT-proBNP, N-terminal-proBNP; eGFR, estimated glomerular filtration rate.



**Table 2. Clinical factors associated with functional decline in the entire cohort in the univariate and multivariable analyses**

| Variables                          | Unadjusted OR<br>(95% CI) | P<br>Value | Adjusted OR<br>(95% CI) | P<br>Value |
|------------------------------------|---------------------------|------------|-------------------------|------------|
| Age ≥80 years                      | 2.97 (2.50–3.52)          | <0.001     | 2.25 (1.81–2.81)        | <0.001     |
| Women                              | 1.45 (1.25–1.70)          | <0.001     | 1.10 (0.90–1.34)        | 0.37       |
| BMI ≤22                            | 1.56 (1.32–1.83)          | <0.001     | 1.19 (0.98–1.45)        | 0.08       |
| LVEF <40%                          | 1.04 (0.89–1.22)          | 0.61       | 1.23 (1.00–1.52)        | 0.048      |
| Prior HF hospitalization           | 1.08 (0.92–1.27)          | 0.36       | 0.97 (0.79–1.19)        | 0.80       |
| Acute coronary syndrome            | 1.56 (1.16–2.11)          | 0.003      | 1.73 (1.17–2.56)        | 0.006      |
| Hypertension                       | 1.00 (0.85–1.20)          | 0.95       | 0.97 (0.77–1.21)        | 0.76       |
| Diabetes mellitus                  | 0.86 (0.73–1.01)          | 0.06       | 0.88 (0.71–1.08)        | 0.22       |
| Atrial fibrillation or flutter     | 0.97 (0.83–1.13)          | 0.67       | 0.91 (0.74–1.11)        | 0.33       |
| Prior myocardial infarction        | 0.94 (0.78–1.13)          | 0.50       | 0.87 (0.69–1.11)        | 0.26       |
| Prior stroke                       | 1.73 (1.43–2.10)          | <0.001     | 1.54 (1.21–1.94)        | <0.001     |
| Chronic lung disease               | 1.11 (0.89–1.39)          | 0.37       | 1.16 (0.89–1.52)        | 0.27       |
| Dementia                           | 2.91 (2.44–3.47)          | <0.001     | 2.03 (1.63–2.53)        | <0.001     |
| Current smoking                    | 0.37 (0.27–0.51)          | <0.001     | 0.56 (0.38–0.82)        | 0.003      |
| Living alone                       | 1.05 (0.87–1.27)          | 0.62       | 1.19 (0.94–1.49)        | 0.14       |
| Anaemia*                           | 1.67 (1.39–1.98)          | <0.001     | 1.07 (0.85–1.35)        | 0.56       |
| Albumin <3.0 g/dL                  | 2.30 (1.89–2.81)          | <0.001     | 1.83 (1.44–2.33)        | <0.001     |
| Sodium <135 mEq/L                  | 1.89 (1.53–2.33)          | <0.001     | 1.68 (1.31–2.16)        | <0.001     |
| eGFR <30 ml/min/1.73m <sup>2</sup> | 2.01 (1.70–2.36)          | <0.001     | 1.76 (1.43–2.17)        | <0.001     |
| Systolic BP <90 mmHg               | 2.01 (1.37–2.96)          | <0.001     | 1.17 (0.67–2.05)        | 0.58       |
| Heart rate <60 beat/min            | 1.07 (0.79–0.79)          | 0.66       | 1.03 (0.72–1.49)        | 0.87       |
| Body temperature ≥37.5 °C          | 2.26 (1.72–2.7)           | <0.001     | 1.89 (1.35–2.63)        | <0.001     |
| NYHA class III or IV               | 2.17 (1.62–2.91)          | <0.001     | 1.69 (1.21–2.35)        | 0.002      |

\*Defined by the World Health Organization criteria (haemoglobin <12 g/dL for women and <13 g/dL for men).

Abbreviations: OR, odds ratio; CI, confidence interval; BMI, body mass index; LVEF, left ventricular ejection; HF, heart failure; eGFR, estimated glomerular filtration rate; BP, blood pressure; NYHA, New York Heart Association.

**eTable 3. Clinical outcomes in the entire cohort**

| Outcomes                                         | Functional decline                                                                           | No functional decline                                                                        | Unadjusted<br>HR<br>(95% CI) | P value | Adjusted<br>HR<br>(95% CI) | P value |
|--------------------------------------------------|----------------------------------------------------------------------------------------------|----------------------------------------------------------------------------------------------|------------------------------|---------|----------------------------|---------|
|                                                  | N of patients with<br>event / N of patients<br>at risk (Cumulative 1-<br>year incidence [%]) | N of patients with<br>event / N of patients<br>at risk (Cumulative 1-<br>year incidence [%]) |                              |         |                            |         |
| All-cause death or HF<br>hospitalization         | 243/528 (49)                                                                                 | 902/3027 (31)                                                                                | 1.95<br>(1.71–2.21)          | <0.001  | 1.39<br>(1.18–1.62)        | <0.001  |
| All-cause death                                  | 174/528 (36)                                                                                 | 386/3027 (13)                                                                                | 3.02<br>(2.58–3.53)          | <0.001  | 1.92<br>(1.57–2.34)        | <0.001  |
| HF hospitalization                               | 116/528 (28)                                                                                 | 663/3027 (23)                                                                                | 1.25<br>(1.04–1.50)          | 0.02    | 0.99<br>(0.80–1.24)        | 0.97    |
| All-cause death or All-<br>cause hospitalization | 279/528 (57)                                                                                 | 1186/3027 (40)                                                                               | 1.69<br>(1.50–1.91)          | <0.001  | 1.34<br>(1.15–1.55)        | <0.001  |

The number of patients with at least one event was counted through the 1-year follow-up period.

Abbreviations: HF, heart failure; HR, hazard ratio; CI, confidence interval.

**eFigure 1. The details of functional decline during ADHF hospitalization.** Functional status at discharge according to functional status before admission is shown. ADHF=acute decompensated heart failure.

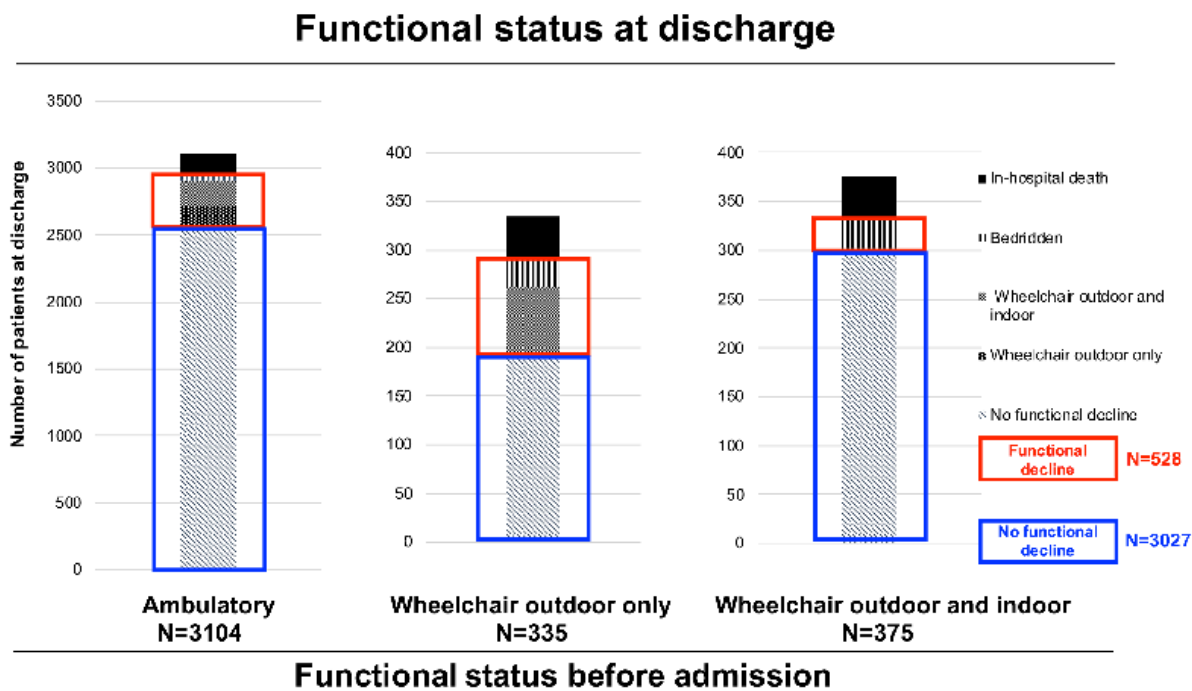

**eFigure 2. Subgroup analysis for the association of functional decline with no functional decline on the primary outcome measure. LVEF=left ventricular ejection fraction, HR=hazard ratio, CI=confidence interval.**

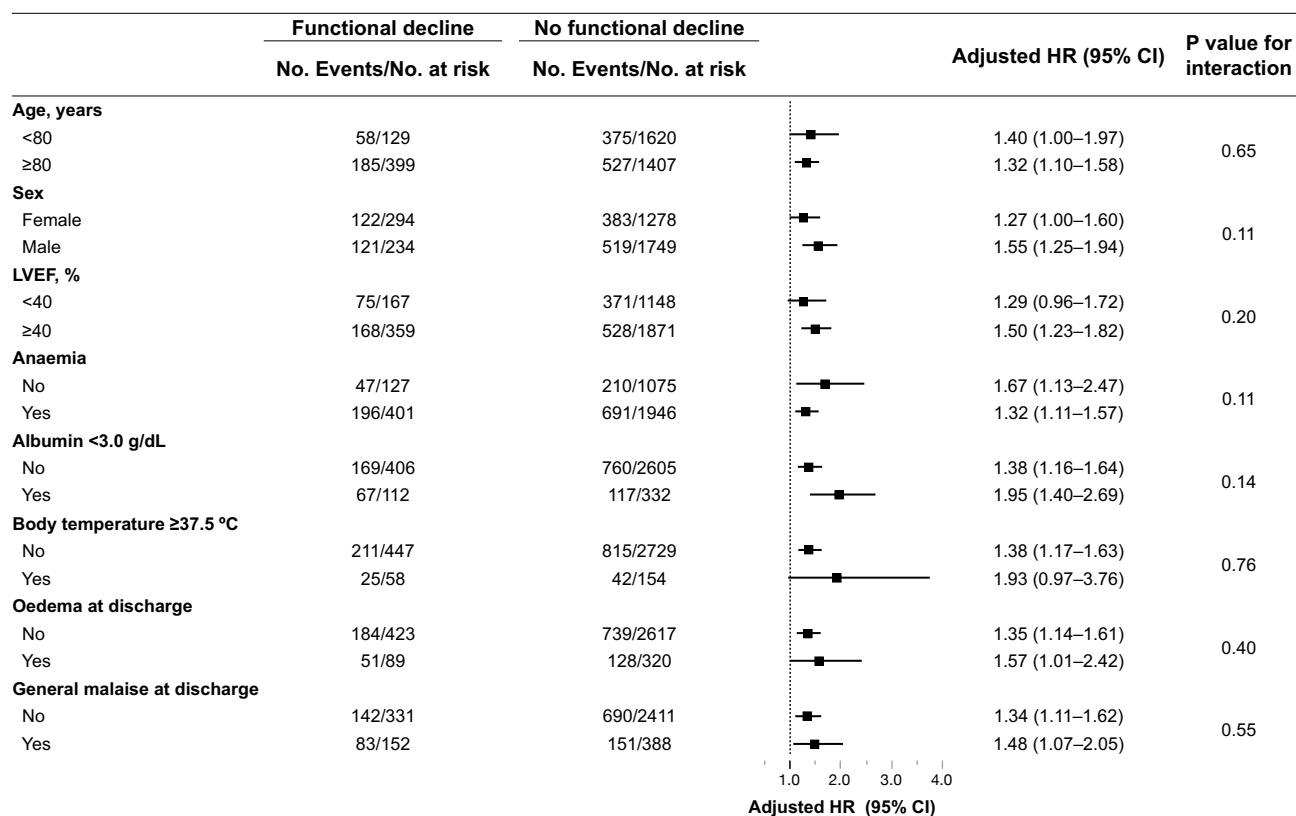

**STROBE 2007 (v4) Statement—Checklist of items that should be included in reports of *cohort studies***

| Section/Topic                | Item # | Recommendation                                                                                                                                                                       | Reported on page # |
|------------------------------|--------|--------------------------------------------------------------------------------------------------------------------------------------------------------------------------------------|--------------------|
| <b>Title and abstract</b>    | 1      | (a) Indicate the study's design with a commonly used term in the title or the abstract                                                                                               | Page 1             |
|                              |        | (b) Provide in the abstract an informative and balanced summary of what was done and what was found                                                                                  | Page 3-4           |
| <b>Introduction</b>          |        |                                                                                                                                                                                      |                    |
| Background/rationale         | 2      | Explain the scientific background and rationale for the investigation being reported                                                                                                 | Page 6             |
| Objectives                   | 3      | State specific objectives, including any prespecified hypotheses                                                                                                                     | Page 8             |
| <b>Methods</b>               |        |                                                                                                                                                                                      |                    |
| Study design                 | 4      | Present key elements of study design early in the paper                                                                                                                              | Page 7             |
| Setting                      | 5      | Describe the setting, locations, and relevant dates, including periods of recruitment, exposure, follow-up, and data collection                                                      | Page 7-8           |
| Participants                 | 6      | (a) Give the eligibility criteria, and the sources and methods of selection of participants. Describe methods of follow-up                                                           | Page 8             |
|                              |        | (b) For matched studies, give matching criteria and number of exposed and unexposed                                                                                                  |                    |
| Variables                    | 7      | Clearly define all outcomes, exposures, predictors, potential confounders, and effect modifiers. Give diagnostic criteria, if applicable                                             | Page 8-10          |
| Data sources/<br>measurement | 8*     | For each variable of interest, give sources of data and details of methods of assessment (measurement). Describe comparability of assessment methods if there is more than one group | Page 8             |
| Bias                         | 9      | Describe any efforts to address potential sources of bias                                                                                                                            | Page 10            |
| Study size                   | 10     | Explain how the study size was arrived at                                                                                                                                            | Page 8             |
| Quantitative variables       | 11     | Explain how quantitative variables were handled in the analyses. If applicable, describe which groupings were chosen and why                                                         | Page 9             |
| Statistical methods          | 12     | (a) Describe all statistical methods, including those used to control for confounding                                                                                                | Page 9-10          |
|                              |        | (b) Describe any methods used to examine subgroups and interactions                                                                                                                  | Page 10-11         |
|                              |        | (c) Explain how missing data were addressed                                                                                                                                          | Page 9             |
|                              |        | (d) If applicable, explain how loss to follow-up was addressed                                                                                                                       | Page               |
|                              |        | (e) Describe any sensitivity analyses                                                                                                                                                | Page 11            |
| <b>Results</b>               |        |                                                                                                                                                                                      |                    |

|                          |     |                                                                                                                                                                                                              |            |
|--------------------------|-----|--------------------------------------------------------------------------------------------------------------------------------------------------------------------------------------------------------------|------------|
| Participants             | 13* | (a) Report numbers of individuals at each stage of study—eg numbers potentially eligible, examined for eligibility, confirmed eligible, included in the study, completing follow-up, and analysed            | Page 12    |
|                          |     | (b) Give reasons for non-participation at each stage                                                                                                                                                         | Page 8     |
|                          |     | (c) Consider use of a flow diagram                                                                                                                                                                           | Page 7-8   |
| Descriptive data         | 14* | (a) Give characteristics of study participants (eg demographic, clinical, social) and information on exposures and potential confounders                                                                     | Page 12    |
|                          |     | (b) Indicate number of participants with missing data for each variable of interest                                                                                                                          | Page 7-8   |
|                          |     | (c) Summarise follow-up time (eg, average and total amount)                                                                                                                                                  | Page 12    |
| Outcome data             | 15* | Report numbers of outcome events or summary measures over time                                                                                                                                               | Page 14    |
| Main results             | 16  | (a) Give unadjusted estimates and, if applicable, confounder-adjusted estimates and their precision (eg, 95% confidence interval). Make clear which confounders were adjusted for and why they were included | Page 13-15 |
|                          |     | (b) Report category boundaries when continuous variables were categorized                                                                                                                                    | Page 10-11 |
|                          |     | (c) If relevant, consider translating estimates of relative risk into absolute risk for a meaningful time period                                                                                             | Page 14-15 |
| Other analyses           | 17  | Report other analyses done—eg analyses of subgroups and interactions, and sensitivity analyses                                                                                                               | Page 15-16 |
| <b>Discussion</b>        |     |                                                                                                                                                                                                              |            |
| Key results              | 18  | Summarise key results with reference to study objectives                                                                                                                                                     | Page 16    |
| <b>Limitations</b>       |     |                                                                                                                                                                                                              |            |
| Interpretation           | 20  | Give a cautious overall interpretation of results considering objectives, limitations, multiplicity of analyses, results from similar studies, and other relevant evidence                                   | Page 19-20 |
| Generalisability         | 21  | Discuss the generalisability (external validity) of the study results                                                                                                                                        | Page 19-20 |
| <b>Other information</b> |     |                                                                                                                                                                                                              |            |
| Funding                  | 22  | Give the source of funding and the role of the funders for the present study and, if applicable, for the original study on which the present article is based                                                | Page 22    |

\*Give information separately for cases and controls in case-control studies and, if applicable, for exposed and unexposed groups in cohort and cross-sectional studies.

**Note:** An Explanation and Elaboration article discusses each checklist item and gives methodological background and published examples of transparent reporting. The STROBE checklist is best used in conjunction with this article (freely available on the Web sites of PLoS Medicine at <http://www.plosmedicine.org/>, Annals of Internal Medicine at <http://www.annals.org/>, and Epidemiology at <http://www.epidem.com/>). Information on the STROBE Initiative is available at [www.strobe-statement.org](http://www.strobe-statement.org).

# BMJ Open

## Risk factors and clinical outcomes of functional decline during hospitalization in very old patients with acute decompensated heart failure: an observational study

|                                 |                                                                                                                                                                                                                                                                                                                                                                                                                                                                                                                                                                                                                                                                                                                                                                                                                                                                                                                                                                                                                                                                                                                                                                                                                                                                                                                                                                                                                                                                                                                                                                                                                                                              |
|---------------------------------|--------------------------------------------------------------------------------------------------------------------------------------------------------------------------------------------------------------------------------------------------------------------------------------------------------------------------------------------------------------------------------------------------------------------------------------------------------------------------------------------------------------------------------------------------------------------------------------------------------------------------------------------------------------------------------------------------------------------------------------------------------------------------------------------------------------------------------------------------------------------------------------------------------------------------------------------------------------------------------------------------------------------------------------------------------------------------------------------------------------------------------------------------------------------------------------------------------------------------------------------------------------------------------------------------------------------------------------------------------------------------------------------------------------------------------------------------------------------------------------------------------------------------------------------------------------------------------------------------------------------------------------------------------------|
| Journal:                        | <i>BMJ Open</i>                                                                                                                                                                                                                                                                                                                                                                                                                                                                                                                                                                                                                                                                                                                                                                                                                                                                                                                                                                                                                                                                                                                                                                                                                                                                                                                                                                                                                                                                                                                                                                                                                                              |
| Manuscript ID                   | bmjopen-2019-032674.R2                                                                                                                                                                                                                                                                                                                                                                                                                                                                                                                                                                                                                                                                                                                                                                                                                                                                                                                                                                                                                                                                                                                                                                                                                                                                                                                                                                                                                                                                                                                                                                                                                                       |
| Article Type:                   | Original research                                                                                                                                                                                                                                                                                                                                                                                                                                                                                                                                                                                                                                                                                                                                                                                                                                                                                                                                                                                                                                                                                                                                                                                                                                                                                                                                                                                                                                                                                                                                                                                                                                            |
| Date Submitted by the Author:   | 02-Dec-2019                                                                                                                                                                                                                                                                                                                                                                                                                                                                                                                                                                                                                                                                                                                                                                                                                                                                                                                                                                                                                                                                                                                                                                                                                                                                                                                                                                                                                                                                                                                                                                                                                                                  |
| Complete List of Authors:       | Yaku, Hidenori; Kyoto University Graduate School of Medicine Faculty of Medicine, Department of Cardiovascular Medicine; Mitsubishi Kyoto Hospital, Cardiology<br>Kato, Takao; Kyoto University Graduate School of Medicine Faculty of Medicine, Department of Cardiovascular Medicine<br>Morimoto, Takeshi; Hyogo College of Medicine, Clinical Epidemiology<br>Inuzuka, Yasutaka; Shiga General Hospital, Cardiovascular Medicine<br>Tamaki, Yodo; Public Interest Incorporated Foundation Tenri Hospital, Cardiology<br>Ozasa, Neiko; Kyoto University Graduate School of Medicine Faculty of Medicine, Department of Cardiovascular Medicine<br>Yamamoto, Erika; Kyoto University Graduate School of Medicine Faculty of Medicine, Department of Cardiovascular Medicine<br>Yoshikawa, Yusuke; Kyoto University Graduate School of Medicine Faculty of Medicine, Department of Cardiovascular Medicine<br>Kitai, Takeshi; Kobe City Medical Center General Hospital, Cardiovascular Medicine<br>Kato, Masashi; Mitsubishi Kyoto Hospital, Department of Cardiology<br>Ikeda, Tomoyuki; Hikone Municipal Hospital, Department of Cardiology<br>Furukawa, Yutaka; Kobe City Medical Center General Hospital, Cardiovascular Medicine<br>Nakagawa, Yoshihisa; Shiga University of Medical Science, Cardiovascular Medicine<br>Sato, Yukihiro; Hyogo Prefectural Amagasaki General Medical Center, Cardiology<br>Kuwahara, Koichiro ; Shinshu University Graduate School of Medicine School of Medicine, Cardiovascular Medicine<br>Kimura, Takeshi; Kyoto University Graduate School of Medicine Faculty of Medicine, Department of Cardiovascular Medicine |
| <b>Primary Subject Heading</b>: | Cardiovascular medicine                                                                                                                                                                                                                                                                                                                                                                                                                                                                                                                                                                                                                                                                                                                                                                                                                                                                                                                                                                                                                                                                                                                                                                                                                                                                                                                                                                                                                                                                                                                                                                                                                                      |
| Secondary Subject Heading:      | Cardiovascular medicine                                                                                                                                                                                                                                                                                                                                                                                                                                                                                                                                                                                                                                                                                                                                                                                                                                                                                                                                                                                                                                                                                                                                                                                                                                                                                                                                                                                                                                                                                                                                                                                                                                      |
| Keywords:                       | Heart failure < CARDIOLOGY, Adult cardiology < CARDIOLOGY, Cardiac Epidemiology < CARDIOLOGY                                                                                                                                                                                                                                                                                                                                                                                                                                                                                                                                                                                                                                                                                                                                                                                                                                                                                                                                                                                                                                                                                                                                                                                                                                                                                                                                                                                                                                                                                                                                                                 |
|                                 |                                                                                                                                                                                                                                                                                                                                                                                                                                                                                                                                                                                                                                                                                                                                                                                                                                                                                                                                                                                                                                                                                                                                                                                                                                                                                                                                                                                                                                                                                                                                                                                                                                                              |

1  
2  
3  
4  
5  
6  
7  
8  
9  
10  
11  
12  
13  
14  
15  
16  
17  
18  
19  
20  
21  
22  
23  
24  
25  
26  
27  
28  
29  
30  
31  
32  
33  
34  
35  
36  
37  
38  
39  
40  
41  
42  
43  
44  
45  
46  
47  
48  
49  
50  
51  
52  
53  
54  
55  
56  
57  
58  
59  
60







I, the Submitting Author has the right to grant and does grant on behalf of all authors of the Work (as defined in the below author licence), an exclusive licence and/or a non-exclusive licence for contributions from authors who are: i) UK Crown employees; ii) where BMJ has agreed a CC-BY licence shall apply, and/or iii) in accordance with the terms applicable for US Federal Government officers or employees acting as part of their official duties; on a worldwide, perpetual, irrevocable, royalty-free basis to BMJ Publishing Group Ltd ("BMJ") its licensees and where the relevant Journal is co-owned by BMJ to the co-owners of the Journal, to publish the Work in this journal and any other BMJ products and to exploit all rights, as set out in our [licence](#).

The Submitting Author accepts and understands that any supply made under these terms is made by BMJ to the Submitting Author unless you are acting as an employee on behalf of your employer or a postgraduate student of an affiliated institution which is paying any applicable article publishing charge ("APC") for Open Access articles. Where the Submitting Author wishes to make the Work available on an Open Access basis (and intends to pay the relevant APC), the terms of reuse of such Open Access shall be governed by a Creative Commons licence – details of these licences and which [Creative Commons](#) licence will apply to this Work are set out in our licence referred to above.

Other than as permitted in any relevant BMJ Author's Self Archiving Policies, I confirm this Work has not been accepted for publication elsewhere, is not being considered for publication elsewhere and does not duplicate material already published. I confirm all authors consent to publication of this Work and authorise the granting of this licence.

1  
2  
3  
4 **1 Risk factors and clinical outcomes of functional decline during hospitalization in very**  
5  
6  
7 **2 old patients with acute decompensated heart failure: an observational study**  
8  
9  
10  
11 3

12  
13 **4 Authors:** Hidenori Yaku, MD <sup>a,f</sup>, Takao Kato, MD <sup>a</sup>, Takeshi Morimoto, MD, MPH <sup>b</sup>,  
14  
15 Yasutaka Inuzuka, MD <sup>c</sup>, Yodo Tamaki, MD <sup>d</sup>, Neiko Ozasa, MD <sup>a</sup>, Erika Yamamoto, MD <sup>a</sup>,  
16  
17 Yusuke Yoshikawa, MD <sup>a</sup>, Takeshi Kitai, MD <sup>e</sup>, Masashi Kato, MD <sup>f</sup>, Tomoyuki Ikeda  
18  
19 <sup>g</sup>, Yutaka Furukawa, MD <sup>e</sup>, Yoshihisa Nakagawa, MD <sup>h</sup>, Yukihiro Sato, MD <sup>i</sup>, Koichiro  
20  
21  
22 8 Kuwahara, MD <sup>j</sup>, Takeshi Kimura, MD <sup>a</sup>, for the KCHF study investigators  
23  
24  
25 9

26  
27  
28 **10 Affiliations:** <sup>a</sup> Department of Cardiovascular Medicine, Kyoto University Graduate School of  
29  
30  
31 Medicine, Kyoto, Japan; <sup>b</sup> Department of Clinical Epidemiology, Hyogo College of  
32  
33  
34  
35 <sup>12</sup> Medicine, Hyogo, Japan; <sup>c</sup> Department of Cardiovascular Medicine, Shiga General Hospital,  
36  
37  
38 <sup>13</sup> Shiga, Japan; <sup>d</sup> Division of Cardiology, Tenri Hospital, Nara, Japan; <sup>e</sup> Department of  
39  
40  
41 <sup>14</sup> Cardiovascular Medicine, Kobe City Medical Centre General Hospital, Hyogo, Japan; <sup>f</sup>  
42  
43  
44  
45 <sup>15</sup> Department of Cardiology, Mitsubishi Kyoto Hospital, Kyoto, Japan; <sup>g</sup> Department of  
46  
47  
48 <sup>16</sup> Cardiology, Hikone Municipal Hospital, Shiga, Japan; <sup>h</sup> Department of Cardiovascular  
49  
50  
51 <sup>17</sup> Medicine, Shiga University of Medical Science, Shiga, Japan; <sup>i</sup> Department of Cardiology,  
52  
53  
54  
55 <sup>18</sup> Hyogo Prefectural Amagasaki General Medical Centre, Hyogo, Japan; <sup>j</sup> Department of  
56  
57  
58 <sup>19</sup> Cardiovascular Medicine, Shinshu University Graduate School of Medicine, Nagano, Japan.  
59  
60

1

2 **Corresponding Author:** Takao Kato, MD.

3 Department of Cardiovascular Medicine, Kyoto University Graduate School of Medicine

4 54 Shogoin Kawahara-cho, Sakyo-ku, Kyoto. 606-8507 Japan

5 Tel: +81-75-751-4254; FAX: +81-75-751-3289; E-mail: [tkato75@kuhp.kyoto-u.ac.jp](mailto:tkato75@kuhp.kyoto-u.ac.jp)

6

7 **Manuscript word count:** 2927 words

8

For peer review only

1  
2  
3  
4 **1 Abstract**

5  
6  
7 **2 Objective:** To investigate the prevalence and risk factors of functional decline during  
8  
9  
10  
11 **3** hospitalization, and its relationship with post-discharge outcomes in very old patients with  
12  
13  
14 **4** acute decompensated heart failure (ADHF) hospitalization.

15  
16  
17 **5 Design:** Prospective cohort study between October 1, 2014, and March 31, 2016.

18  
19  
20  
21 **6 Setting:** A physician-initiated multicentre study of consecutive patients admitted for ADHF  
22  
23  
24 **7** into 19 hospitals throughout Japan.

25  
26  
27 **8 Participants:** Among 3555 patients hospitalized for ADHF (median age [IQR], 80 [71-86]  
28  
29  
30  
31 **9** years; 1572 [44%] women), functional decline during the index hospitalization occurred in  
32  
33  
34 **10** 528 patients (15%).

35  
36  
37 **11 Primary and secondary outcomes:** The primary outcome measure was a composite of all-  
38  
39  
40  
41 **12** cause death or heart failure (HF) hospitalization after discharge. The secondary outcome  
42  
43  
44 **13** measures were all-cause death, HF hospitalization, and a composite of all-cause death or all-  
45  
46  
47 **14** cause hospitalization.

48  
49  
50  
51 **15 Results:** The independent risk factors for functional decline included age  $\geq 80$  years (OR  
52  
53  
54 **16** 2.71; 95%CI 2.09–3.51), women (OR 1.32; 95%CI 1.05–1.67), prior stroke (OR 1.67; 95%  
55  
56  
57 **17** CI 1.28–2.19), dementia (OR 2.26; 95%CI 1.74–2.95), ambulatory before admission (OR

1 1.74; 95%CI 1.29–2.35), elevated body temperature (OR 1.91; 95%CI 1.31–2.79), New York  
2  
3  
4  
5  
6  
7  
8 2 Heart Association class III or IV on admission (OR 1.54; 95%CI 1.07–2.22), decreased  
9  
10  
11 3 albumin levels (OR 1.76; 95%CI 1.32–2.34), hyponatremia (OR 1.49; 95%CI 1.10–2.03),  
12  
13  
14 4 renal dysfunction (OR 1.55; 95%CI 1.22–1.98) after multivariable adjustment. The  
15  
16  
17  
18 5 cumulative 1-year incidence of the primary outcome in the functional decline group was  
19  
20  
21 6 significantly higher than that in the no functional decline group (50% vs. 31%, log-rank  
22  
23  
24 7  $P<0.001$ ). After adjusting for baseline characteristics, the higher risk of the functional decline  
25  
26  
27  
28 8 group relative to the no functional decline group remained significant (adjusted HR 1.46;  
29  
30  
31 9 95% CI 1.24–1.71;  $P<0.001$ ).

32  
33  
34 10 **Conclusions:** Independent risk factors of functional decline in very old patients with ADHF  
35  
36  
37 11 were related to both frailty and severity of HF. Functional decline during ADHF  
38  
39  
40  
41 12 hospitalization was associated with unfavourable post-discharge outcomes.

42  
43  
44 13 **Trial Registration:** <https://clinicaltrials.gov/ct2/show/NCT02334891> (NCT02334891) and  
45  
46  
47  
48 14 [https://upload.umin.ac.jp/cgi-open-bin/ctr\\_e/ctr\\_view.cgi?recptno=R000017241](https://upload.umin.ac.jp/cgi-open-bin/ctr_e/ctr_view.cgi?recptno=R000017241)  
49  
50  
51 15 (UMIN000015238)

52  
53  
54 16

## 1 Strengths and limitations of this study

- 2 • This study is the first large-scale contemporary multicentre observational study reporting  
3 the prevalence of functional decline in very old patients hospitalized for acute  
4 decompensated heart failure (ADHF).
- 5 • The data of this study were prospectively collected on consecutive patients who had  
6 hospital admission due to ADHF in the real-world clinical practice in Japan.
- 7 • This study examines the risk factors of functional decline in very old patients  
8 hospitalized for ADHF, and whether functional decline during the index hospitalization  
9 was associated with worse post-discharge outcomes.
- 10 • We did not collect data regarding on-site and outpatient rehabilitation and nutritional  
11 support.

## 1 Introduction

2 Functional decline in hospitalized patients is a complex and dynamic process [1–3].  
3 Functional decline during hospitalization was reported to occur in approximately 30-50% of  
4 patients hospitalized for acute medical illness [2,4,5]. In the rapidly aging societies, the  
5 number of very old patients hospitalized for acute decompensated heart failure (ADHF) is  
6 increasing, and ADHF has become the leading cause of hospitalization due to acute medical  
7 illness. In older patients, functional decline associated with hospitalization often leads to  
8 subsequent inability to live actively and independently.

9 However, there is a scarcity of data regarding the risk factors of functional decline  
10 in very old patients hospitalized for ADHF. Identifying high-risk patients for functional  
11 decline during hospitalization would be useful for its prevention. Furthermore, no previous  
12 study focused on subsequent clinical outcomes in patients with functional decline during  
13 hospitalization. Therefore, we sought to clarify the risk factors for functional decline during  
14 hospitalization in very old patients with ADHF and to compare the 1-year clinical outcomes  
15 between the 2 groups of patients with and without functional decline during the  
16 hospitalization for ADHF in a large Japanese observational database of hospitalized patients  
17 for ADHF in the real-world clinical practice.

## 1 **Methods**

### 2 **Study Design, Setting, and Population**

3           The Kyoto Congestive Heart Failure (KCHF) registry is a physician-initiated,  
4 prospective, observational, multicentre cohort study that enrolled consecutive patients who  
5 were hospitalized for ADHF for the first time between October 1, 2014, and March 31, 2016.  
6 These patients were admitted into 19 secondary and tertiary hospitals, including rural and  
7 urban as well as large and small institutions, throughout Japan. The study protocol was  
8 approved by the institutional review board of Kyoto University (approval number: E2311)  
9 and each participating centre. A waiver of written informed consent from each patient was  
10 granted by the institutional review boards of Kyoto University and each participating centre  
11 because the study met the conditions of the Japanese ethical guidelines for epidemiological  
12 study and the US policy for protecting human research participants.[6,7] This study followed  
13 the Strengthening the Reporting of Observational Studies in Epidemiology (STROBE)  
14 reporting guideline.

15           The details of the KCHF study design and patient enrolment are described  
16 elsewhere.[8–11] Briefly, we enrolled all patients with ADHF, as defined by the modified  
17 Framingham criteria, who were admitted to the participating hospitals and patients who



1  
2  
3  
4 1 underwent heart failure-specific treatment involving intravenous drugs within 24 hours after  
5  
6  
7  
8 2 hospital presentation. Patient records were anonymized before analysis. Data analysis was  
9  
10  
11 3 conducted from August 2018 to October 2018.  
12  
13

14 4 Among 4056 patients enrolled in the KCHF registry, 3785 patients were discharged  
15  
16  
17 5 alive after hospitalization for ADHF. Clinical follow-up data were collected in October 2017.  
18  
19  
20  
21 6 The attending physicians or research assistants at each participating hospital collected clinical  
22  
23  
24 7 events after the index hospitalization from hospital charts or by contacting patients, their  
25  
26  
27  
28 8 relatives, or their referring physicians with consent. The present analysis had 2 objectives.  
29  
30  
31 9 First, we sought to clarify the risk factors for functional decline during hospitalization of  
32  
33  
34 10 ADHF patients. Second, we sought to compare the 1-year clinical outcomes between the 2  
35  
36  
37  
38 11 groups of patients with and without functional decline during the hospitalization for ADHF.  
39  
40  
41 12 Among 4056 patients enrolled in the KCHF registry, the current study population consisted  
42  
43  
44 13 of 3555 patients who were discharged alive and were assessed for functional decline during  
45  
46  
47  
48 14 hospitalization, excluding 271 patients who died during the index hospitalization, 99 patients  
49  
50  
51 15 whose functional status before admission and/or at discharge was not available, and 131  
52  
53  
54 16 patients who were bedridden before index hospitalization (Figure 1). The long-term follow-  
55  
56  
57  
58 17 up was censored at 1-year. The primary outcome measure in the current analysis was a  
59  
60

1  
2  
3  
4 1 composite of all-cause death or heart failure hospitalization at 1-year. The secondary outcome  
5  
6  
7  
8 2 measures were all-cause death, heart failure hospitalization, and a composite of all-cause  
9  
10  
11 3 death or all-cause hospitalization at 1-year.  
12  
13

#### 14 **Definitions**

15  
16  
17 5 Physical activity before admission and at discharge was classified by mobility  
18  
19  
20  
21 6 status based on the definition of Japanese long-term care insurance into ambulatory  
22  
23  
24 7 (including those patients using any aid such as stick), use of wheelchair outdoor only, use of  
25  
26  
27  
28 8 wheelchair indoor and outdoor, and bedridden state.[8] Functional decline was defined as the  
29  
30  
31 9 decline of at least one stage on physical activity at discharge compared with pre-admission  
32  
33  
34 10 status. In-hospital worsening heart failure was defined as additional intravenous drug  
35  
36  
37  
38 11 administration for heart failure, haemodialysis, or mechanical circulatory or respiratory  
39  
40  
41 12 support, occurring >24 hours after therapy initiation.[12] In-hospital worsening renal function  
42  
43  
44 13 was defined as >0.3 mg/dL increase in serum creatinine levels during the index  
45  
46  
47  
48 14 hospitalization.[13–15] Detailed definitions of baseline clinical characteristics including the  
49  
50  
51 15 signs and symptoms of heart failure were described previously.[9] Missing values were  
52  
53  
54 16 presented in eTable 1.  
55  
56

#### 57 **Statistical Analysis**

1  
2  
3  
4 1 Categorical variables were presented as numbers with percentages and compared  
5  
6  
7  
8 2 using  $\chi^2$  test. Continuous variables were expressed as the mean with standard deviation or  
9  
10  
11 3 median with 25th to 75th percentiles, and compared using the Student's *t* test when normally  
12  
13  
14 4 distributed or Wilcoxon rank-sum test when not normally distributed.  
15  
16

17  
18 5 We compared baseline characteristics and clinical outcomes based on the presence  
19  
20  
21 6 or absence of functional decline during the index hospitalization. A multivariable logistic  
22  
23  
24 7 regression model was developed to identify clinical characteristics associated with an  
25  
26  
27 8 increased risk for functional decline. We used 24 clinically relevant factors listed in Table 1  
28  
29  
30  
31 9 as potential independent risk factors in multivariable logistic regression models and estimated  
32  
33  
34 10 the odd ratios (ORs) and 95% confidence intervals (CIs). We used the Kaplan-Meier method  
35  
36  
37  
38 11 to estimate the cumulative 1-year incidences of the outcome measures and assessed the  
39  
40  
41 12 differences with the log-rank test. We expressed the associations of the functional decline  
42  
43  
44 13 group with the no functional decline group for all outcome measures as hazard ratios (HRs)  
45  
46  
47  
48 14 with 95% CIs by multivariable Cox proportional hazard models incorporating 30 clinically  
49  
50  
51 15 relevant risk-adjusting variables indicated in Table 1. We also conducted subgroup analyses  
52  
53  
54 16 stratified by age, sex, LVEF, anaemia, albumin levels, body temperature, and the  
55  
56  
57  
58 17 symptomatic status at discharge (oedema and general malaise at discharge). In the  
59  
60

1  
2  
3  
4 1 multivariable analysis and subgroup analyses, continuous variables were dichotomized by  
5  
6  
7 2 clinically meaningful reference values or median values; age  $\geq 80$  years based on the median  
8  
9  
10 3 value, LVEF  $< 40\%$  based on the heart failure guideline of LVEF classification [16], BMI  
11  
12  
13  
14 4  $\leq 22$  kg/m<sup>2</sup>, renal dysfunction (eGFR  $< 30$  ml/min/1.73m<sup>2</sup>) based on CKD grade, decreased  
15  
16  
17 5 albumin levels (serum albumin  $< 3.0$  g/dL), hyponatremia (serum sodium  $< 135$  mEq/L),  
18  
19  
20 6 elevated body temperature (body temperature  $\geq 37.5^\circ\text{C}$ ) based on the cut-off value in  
21  
22  
23  
24 7 metabolic syndrome [17].  
25  
26

27 8 We performed an additional analysis using the data including those patients who  
28  
29  
30 9 died during the index hospitalization and those who were bedridden before the index  
31  
32  
33  
34 10 hospitalization, and evaluated the factors associated with functional decline or in-hospital  
35  
36  
37 11 mortality by constructing the multivariable adjusted Cox models. All statistical analyses were  
38  
39  
40  
41 12 conducted by a physician (H.Y.) and a statistician (T.M.) with JMP 13.0 or SAS 9.4 (both  
42  
43  
44 13 SAS Institute Inc, Cary, NC). Two-tailed P-values less than 0.05 were considered statistically  
45  
46  
47 14 significant.  
48  
49

## 50 15 **Patient and public involvement**

51 16 No patient involved.  
52  
53  
54  
55  
56  
57  
58 17  
59  
60

## 1 **Results**

### 2 **Baseline Clinical Characteristics**

3           Among 3555 study patients, physical activity before admission included  
4 ambulatory in 2949 patients (83%), wheelchair outdoor only in 272 patients (7.7%), and  
5 wheelchair outdoor and indoor in 334 patients (9.4%). At hospital discharge, functional  
6 decline was observed in 420 patients (14%) who were ambulatory before admission, in 80  
7 patients (29%) who had used wheelchair outdoor only, and in 28 patients (8.4%) who had  
8 used wheelchair outdoor and indoor. Consequently, decline in functional status was observed  
9 in 528 patients (15%; functional decline group), while functional decline was not observed in  
10 3027 patients (85%; no functional decline group) (eFigure 1). Wheelchair outdoor only  
11 before admission were more prevalent in the functional decline group than in the no  
12 functional decline group; however, 80% of patients in the functional decline group were  
13 ambulatory before admission (Table 1).

14           Regarding the baseline clinical characteristics, the patients in the functional decline  
15 group were older and had a higher prevalence of hypertension, prior stroke, renal  
16 dysfunction, dementia, malignancy, anaemia, decreased albumin levels, and hyponatremia  
17 (Table 1). There were no significant differences in previous heart failure hospitalization,

1  
2  
3  
4 1 atrial fibrillation or flutter, previous myocardial infarction, chronic lung disease, and living  
5  
6  
7  
8 2 alone status as a social background between the 2 groups (Table 1). The functional decline  
9  
10  
11 3 group was more likely to have a valvular aetiology, lower blood pressure, lower heart rate,  
12  
13  
14 4 higher levels of brain natriuretic peptide (BNP) or N-terminal portion of proBNP (NT-  
15  
16  
17 5 proBNP), and a higher LVEF (Table 1). The proportion of patients who achieved relief of  
18  
19  
20  
21 6 signs and symptoms on admission after the treatment in the emergency room was not  
22  
23  
24 7 significantly different between the 2 groups (14% vs. 16%, P=0.25).  
25  
26

## 27 8 **Risk Factors for Functional Decline**

29  
30  
31 9 Among the baseline characteristics and status at hospital presentation, the following  
32  
33  
34 10 independent risk factors for functional decline during hospitalization were identified by the  
35  
36  
37 11 multivariable logistic regression analysis: age  $\geq 80$  years (OR 2.71; 95% CI 2.09–3.51),  
38  
39  
40  
41 12 women (OR 1.32; 95% CI 1.05–1.67), prior stroke (OR 1.67; 95% CI 1.28–2.19), dementia  
42  
43  
44 13 (OR 2.26; 95% CI 1.74–2.95), ambulatory before admission (OR 1.74; 95% CI 1.29–2.35),  
45  
46  
47 14 elevated body temperature (OR 1.91; 95% CI 1.31–2.79), New York Heart Association class  
48  
49  
50  
51 15 III or IV on admission (OR 1.54; 95% CI 1.07–2.22), decreased albumin levels (OR 1.76;  
52  
53  
54 16 95% CI 1.32–2.34), hyponatremia (OR 1.49; 95% CI 1.10–2.03), renal dysfunction (OR 1.55;  
55  
56  
57 17 95% CI 1.22–1.98) (Figure 2).  
58  
59  
60

## 1 **In-hospital adverse events and status at discharge**

2           The median length of hospital stay was longer in the functional decline group than  
3 in the no functional decline group (21 days vs. 15 days,  $P < 0.001$ ). Regarding the in-hospital  
4 adverse events, the prevalence of worsening heart failure, worsening renal function, and  
5 stroke was higher in the functional decline group than in the no functional decline group  
6 (Table 2). The proportion of patients with symptoms such as oedema and general malaise at  
7 discharge was higher in the functional decline group than in the no functional decline group  
8 (Table 1). Consequently, the proportion of patients in the functional decline group discharged  
9 to home was also lower (47% vs. 90%,  $P < 0.001$ ). Regarding medical treatment at discharge,  
10 angiotensin-converting enzyme inhibitor or angiotensin receptor blocker (ACEI or ARB), and  
11 beta blocker were less often prescribed in the functional decline group than in the no  
12 functional decline group (Table 1).

## 13 **Long-term outcomes: functional decline vs. no functional decline groups**

14           Follow-up rate at 1-year was 96%. The cumulative 1-year incidence of the primary  
15 outcome measure (a composite of all-cause death or heart failure hospitalization) in the  
16 functional decline group was significantly higher than that in the no functional decline group  
17 (49% vs. 31%, log-rank  $P < 0.001$ ) (Figure 3). After adjusting for baseline characteristics, the

1  
2  
3  
4 1 higher risk of the functional decline group relative to the no functional decline group  
5  
6  
7  
8 2 remained significant (adjusted HR, 1.46; 95%CI, 1.24–1.71; P<0.001) (Figure 3 and Table  
9  
10  
11 3). The cumulative 1-year incidence of all-cause death was also significantly higher in the  
12  
13  
14 4 functional decline group than in the no functional decline group. Even after adjusting  
15  
16  
17 5 confounders, the excess mortality risk of the functional decline group relative to the no  
18  
19  
20  
21 6 functional decline group remained significant (Figure 3 and Table 3). The cumulative 1-year  
22  
23  
24 7 incidence of heart failure hospitalization was also significantly higher in the functional  
25  
26  
27  
28 8 decline group than in the no functional decline group. However, the adjusted risk of the  
29  
30  
31 9 functional decline group relative to the no functional decline group for heart failure  
32  
33  
34 10 hospitalization was no longer significant (Figure 3 and Table 3). The cumulative 1-year  
35  
36  
37  
38 11 incidence of a composite of all-cause death or all-cause hospitalization was significantly  
39  
40  
41 12 higher in the functional decline group than in the no functional decline group. After adjusting  
42  
43  
44 13 confounders, the higher risk of the functional decline group relative to the no functional  
45  
46  
47  
48 14 decline group remained significant (Figure 3 and Table 3). In the subgroup analyses, there  
49  
50  
51 15 were no interactions between those subgroup factors and the association of functional decline  
52  
53  
54 16 with the primary outcome measure (eFigure 2).

57 **Additional analysis on the risk factors for functional decline or in-hospital mortality**  
58  
59  
60



1  
2  
3  
4 1 The risk factors for functional decline or in-hospital mortality in a total of 4056  
5  
6  
7  
8 2 patients were similar to the risk factors for functional decline. LVEF <40% (OR, 1.24; 95%  
9  
10  
11 3 CI, 1.00–1.52; P = 0.047) and acute coronary syndrome (OR, 1.76; 95% CI, 1.19–2.60; P =  
12  
13  
14 4 0.005) that were not included in the risk factors for functional decline emerged as the risk  
15  
16  
17  
18 5 factors for functional decline or in-hospital mortality (eTable 2). Meanwhile, among the risk  
19  
20  
21 6 factors for functional decline, women (OR, 1.13; 95% CI, 0.93–1.38; P = 0.22) was not  
22  
23  
24 7 included in the risk factors for functional decline or in-hospital mortality (Figure 2 and  
25  
26  
27  
28 8 eTable 2).

## 9 10 **Discussion**

11 The main findings of the present study investigating the prevalence and risk factors  
12 of functional decline during hospitalization, and its relationship with post-discharge outcomes  
13 in patients with ADHF hospitalization were as follows; 1) Functional decline during ADHF  
14 hospitalization occurred in 15% of patients, and 80% of those with functional decline were  
15 ambulatory before admission; 2) The independent baseline risk factors associated with  
16 functional decline included age  $\geq 80$  years, women, prior stroke, dementia, ambulatory before  
17 admission, elevated body temperature, NYHA class III or IV on admission, decreased

1  
2  
3  
4 1 albumin levels, hyponatremia, and renal dysfunction. 3) Functional decline during the index  
5  
6  
7 2 hospitalization was associated with higher long-term risk for a composite of all-cause death  
8  
9  
10  
11 3 or heart failure hospitalization.  
12  
13

14 4 This is the first large-scale contemporary multicentre study reporting the  
15  
16  
17 5 prevalence of functional decline in patients hospitalized for ADHF. Of note, we identified the  
18  
19  
20  
21 6 severity of symptoms or patient status specific for heart failure was associated with functional  
22  
23  
24 7 decline independent of well-known factors in acute medical illness [18–20]. Functional  
25  
26  
27 8 decline is an inevitable consequence in aged people, but hospitalization accelerates the  
28  
29  
30  
31 9 decline [20–22]. Functional declines have been found to be related not only to impairment of  
32  
33  
34 10 independence and quality of life (QOL), but also to increased health service use, higher risk  
35  
36  
37 11 for institutionalization, and higher risk for mortality [23–27]. Indeed, in the present study, the  
38  
39  
40  
41 12 proportion of patients discharged to home was lower in the functional decline group than in  
42  
43  
44 13 the no functional decline group, suggesting impaired QOL after discharge. Also, the long-  
45  
46  
47 14 term mortality was worse in the functional decline group than in the no functional decline  
48  
49  
50  
51 15 group. Therefore, it is important to recognize risk factors of functional decline. In previous  
52  
53  
54 16 studies of hospitalized patients with acute medical illness, the predictors of functional decline  
55  
56  
57 17 in hospitalized elderly patients were older age, admission diagnosis, lower functional status,  
58  
59  
60

1 impaired cognitive status, comorbidities, and length of hospital stay.[18–20] These findings  
2 were confirmed in the setting of ADHF in our present study. In addition, findings specific for  
3 ADHF such as the dyspnoea or hyponatremia was associated with functional decline, which  
4 were also reported to be the risk factors for in-hospital mortality in ADHF [28]. The  
5 prevalence of oedema and general malaise at discharge was higher in the functional decline  
6 group. Early achievement of successful ADHF treatment might reduce the risk of functional  
7 decline, although the present observational study could not address the cause-effect  
8 relationship between the functional decline and the symptomatic status at discharge.

9           There might be several possible strategies to prevent functional decline during  
10 ADHF hospitalization. The first is the early improvement of hemodynamic status to avoid  
11 worsening heart failure. The prevalence of worsening heart failure was higher in the  
12 functional decline group. As functional decline associated with hospitalization begins within  
13 48 hours of admission, early improvement of heart failure to reduce the incidence of  
14 hospitalization-associated disability is one of the main goals of care.[28] Second, it would be  
15 important to be adequately aware high-risk patients to make aggressive intervention for  
16 preventing functional decline. We identified the risk factors among the baseline  
17 characteristics in ADHF patients. In addition, the adverse events during hospitalization may

1 be tightly related to the functional decline. Stroke is one of causes of functional decline and  
2  
3  
4  
5  
6  
7  
8 observed in 5.1% of patients with functional decline. Third, a strategy for the prevention of  
9  
10  
11 functional decline might be the seamless rehabilitation and comprehensive geriatric  
12  
13  
14 management through a multidisciplinary team approach.[29–32] In addition, the subgroup  
15  
16  
17  
18 analysis showed that there were no interactions between those subgroup factors and the  
19  
20  
21 association of functional decline with the primary outcome measure. Thus, prevention of  
22  
23  
24 functional decline would have an impact on improving outcomes in all of the patients with  
25  
26  
27  
28 ADHF. One possible strategy could be immediate, tailored physical function rehabilitation  
29  
30  
31 during and after heart failure hospitalization.[33]  
32

### 33 **Limitations**

34  
35  
36  
37 This study has several limitations. First, we adopted simple classification of  
38  
39  
40 functional status as ambulatory, use of wheelchair outdoor only, use of wheelchair indoor and  
41  
42  
43 outdoor, and bedridden state based on the definition of Japanese long-term care insurance.  
44  
45  
46  
47 The categorization scheme is an easy to understand but coarse measure with very large  
48  
49  
50 gradations inherent in each single stage and therefore very likely substantially underestimated  
51  
52  
53  
54 the prevalence of meaningful functional decline. Second, we did not collect data regarding  
55  
56  
57  
58 on-site and outpatient rehabilitation and nutritional support. However, a team-based approach  
59  
60

1 for heart failure patients was adapted in all the participating centres in the present study.

2 Third, we did not include the status at discharge or adverse in-hospital events in the analysis

3 for the risk factor for functional decline, because the cause-effect relationship was not clear.

4 Fourth, data on post-discharge medication and change of functional status after discharge

5 from the index hospitalization were not collected, and not analysed in the analysis for the

6 long-term outcomes. Fifth, as with any observational study, the possibility of selection bias

7 and residual confounding cannot be excluded, although we adjusted for 29 variables as most

8 conceivable confounders.

## 9 **Conclusions**

10 Independent risk factors of functional decline in ADHF patients were related to

11 both frailty and severity of heart failure. Functional decline during ADHF hospitalization was

12 associated with unfavourable post-discharge outcomes.

## 1 **Acknowledgment**

2 We gratefully acknowledge the contributions from KCHF study investigators (Hidenori  
3 Yaku, MD; Takao Kato, MD; Neiko Ozasa, MD; Erika Yamamoto, MD; Yusuke Yoshikawa,  
4 MD; Tetsuo Shioi, MD; Koichiro Kuwahara, MD; Takeshi Kimura, MD, at Kyoto University  
5 Hospital, Kyoto, Japan, Moritake Iguchi, MD; Yugo Yamashita, MD, Masaharu Akao, MD,  
6 at National Hospital Organization Kyoto Medical Centre, Kyoto, Japan, Masashi Kato, MD;  
7 Shinji Miki, MD, at Mitsubishi Kyoto Hospital, Kyoto, Japan, Mamoru Takahashi, MD, at  
8 Shimabara Hospital, Kyoto, Japan, Tsuneaki Kawashima, MD; Takafumi Yagi, MD, at  
9 Okamoto Memorial Hospital, Toshikazu Jinnai, MD; Takashi Konishi, MD, at Japanese Red  
10 Cross Otsu Hospital, Otsu, Japan, Yasutaka Inuzuka, MD; Shigeru Ikeguchi, MD, at Shiga  
11 General Hospital, Moriyama, Japan, Tomoyuki Ikeda, MD; Yoshihiro Himura, MD, at  
12 Hikone Municipal Hospital, Hikone, Japan, Kazuya Nagao, MD; Tsukasa Inada, MD, at  
13 Osaka Red Cross Hospital, Osaka, Japan, Kenichi Sasaki, MD; Moriaki Inoko, MD, at Kitano  
14 Hospital, Osaka, Japan, Takafumi Kawai, MD; Tomoki Sasa, MD; Mitsuo Matsuda, MD, at  
15 Kishiwada City Hospital, Kishiwada, Japan, Akihiro Komasa, MD; Katsuhisa Ishii, MD, at  
16 Kansai Electric Power Hospital, Osaka, Japan, Yodo Tamaki, MD; Yoshihisa Nakagawa,  
17 MD, at Tenri Hospital, Tenri, Japan, Ryoji Taniguchi, MD; Yukihito Sato, MD; Yoshiki

1 Takatsu, MD, at Hyogo Prefectural Amagasaki General Medical Centre, Amagasaki, Japan,  
2  
3  
4  
5  
6  
7  
8 2 Takeshi Kitai, MD;, Ryouyuke Murai, MD; Yutaka Furukawa, MD, at Kobe City Medical  
9  
10  
11 3 Centre General Hospital, Kobe, Japan, Mitsunori Kawato, MD, at Kobe City Nishi-Kobe  
12  
13  
14 4 Medical Centre, Kobe, Japan, Yasuyo Motohashi, MD; Kanae Su, MD; Mamoru Toyofuku,  
15  
16  
17 5 MD; Takashi Tamura, MD, at Japanese Red Cross Wakayama Medical Centre, Wakayama,  
18  
19  
20  
21 6 Japan, Reiko Hozo, MD; Ryusuke Nishikawa, MD; Hiroki Sakamoto, MD, at Shizuoka  
22  
23  
24 7 General Hospital, Shizuoka, Japan, Yuichi Kawase, MD; Keiichiro Iwasaki, MD; Kazushige  
25  
26  
27 8 Kadota, MD, at Kurashiki Central Hospital, Kurashiki, Japan, and Takashi Morinaga, MD;  
28  
29  
30  
31 9 Yohei Kobayashi, MD; Kenji Ando, MD, at Kokura Memorial Hospital, Kokura, Japan.).  
32  
33

## 34 10 **Sources of Funding**

35  
36  
37 11 This study is supported by a grant from the Japan Agency for Medical Research and  
38  
39  
40  
41 12 Development (18059186) to TK, KK, NO. The founder had no role in the study design,  
42  
43  
44 13 collection, analysis or interpretation of the data, writing the manuscript, or the decision to  
45  
46  
47 14 submit the paper for publication.  
48  
49

## 50 51 15 **Competing interests**

52  
53  
54 16 None declared.  
55

## 56 57 17 **Author Contributions**

- 1  
2  
3  
4 1 Drs Yaku and T. Kato had full access to all of the data in the study and take responsibility for  
5  
6  
7  
8 2 the integrity of the data and the accuracy of the data analysis.  
9  
10  
11 3 Concept and design: Yaku, T. Kato, Morimoto, Tamaki, Ozasa, Yamamoto, Kitai, M. Kato,  
12  
13  
14 4 Kimura.  
15  
16  
17 5 Acquisition, analysis, or interpretation of data: Yaku, T. Kato, Morimoto, Inuzuka, Tamaki,  
18  
19  
20  
21 6 Yoshikawa, Ikeda, Furukawa, Kuwahara.  
22  
23  
24 7 Drafting of the manuscript: Yaku, T. Kato, Kimura.  
25  
26  
27 8 Critical revision of the manuscript for important intellectual content: Yaku, T. Kato,  
28  
29  
30  
31 9 Morimoto, Inuzuka, Tamaki, Yamamoto, Yoshikawa, Kitai, Kuwahara, Kimura.  
32  
33  
34 10 Statistical analysis: Yaku, T. Kato, Morimoto.  
35  
36  
37  
38 11 Administrative, technical, or material support: T. Kato, Sato, Kimura.  
39  
40  
41 12 Supervision: Inuzuka, Ozasa, Kitai, Furukawa, Nakagawa, Sato, Kuwahara, Kimura.  
42  
43

### 13 **Ethics approval**

- 14 The study was approved by the Institutional Review Boards of Kyoto University Graduate  
15 School of Medicine (approval number: E2311), Shiga General Hospital (approval number:  
16 20141120-01), Tenri Hospital (approval number: 640), Kobe City Medical Centre General  
17 Hospital (approval number: 14094), Hyogo Prefectural Amagasaki General Medical Centre



1 (approval number: Rinri 26-32), National Hospital Organization Kyoto Medical Centre  
2  
3  
4  
5  
6  
7  
8 2 (approval number:14-080), Mitsubishi Kyoto Hospital (approved 11/12/2014 ), Okamoto  
9  
10  
11 3 Memorial Hospital (approval number: 201503), Japanese Red Cross Otsu Hospital (approval  
12  
13  
14 4 number: 318), Hikone Municipal Hospital (approval number: 26-17), Japanese Red Cross  
15  
16  
17 5 Osaka Hospital (approval number: 392), Shimabara Hospital (approval number: E2311),  
18  
19  
20  
21 6 Kishiwada City Hospital (approval number:12), Kansai Electric Power Hospital (approval  
22  
23  
24 7 number: 26-59), Shizuoka General Hospital (approval number: Rin14-11-47), Kurashiki  
25  
26  
27 8 Central Hospital (approval number: 1719), Kokura Memorial Hospital (approval number:  
28  
29  
30  
31 9 14111202), Kitano Hospital (approval number: P14-11-012), and Japanese Red Cross  
32  
33  
34 10 Wakayama Medical Centre (approval number: 328).

### 11 **Data sharing**

12 All data relevant to the study are included in the article or uploaded as supplementary  
13 information. No additional data available.  
14

1  
2  
3  
4 **1 References**  
5  
6  
7

- 8 2 1 Manton KG. A longitudinal study of functional change and mortality in the United  
9  
10 States. *J Gerontol* 1988;**43**:S153-61.<http://www.ncbi.nlm.nih.gov/pubmed/2971088>  
11 3  
12  
13  
14 4 2 Boyd CM, Ricks M, Fried LP, *et al.* Functional decline and recovery of activities of  
15  
16 daily living in hospitalized, disabled older women: the Women's Health and Aging  
17 5  
18 Study I. *J Am Geriatr Soc* 2009;**57**:1757–66. doi:10.1111/j.1532-5415.2009.02455.x  
19 6  
20  
21  
22  
23  
24 7 3 Guralnik JM, Alexih L, Branch LG. Medical and Long-Term Care Costs When Older  
25  
26 Persons Become More Dependent Intentional Weight Loss and 13-Year Diabetes  
27 8  
28 Incidence in Overweight Adults. *Am J Public Health* 2002;**92**:1244–5.  
29 9  
30  
31  
32  
33  
34 10 4 Gill TM, Allore HG, Holford TR, *et al.* Hospitalization, restricted activity, and the  
35  
36 development of disability among older persons. *J Am Med Assoc* 2004;**292**:2115–24.  
37 11  
38  
39  
40  
41 12  
42  
43  
44 13 5 Sager MA, Franke T, Inouye SK, *et al.* Functional outcomes of acute medical illness  
45  
46 and hospitalization in older persons. *Arch Intern Med* 1996;**156**:645–  
47 14  
48  
49  
50  
51 15  
52  
53  
54 16 6 Ministry of Education, Culture, Sports, Science and Technology Ministry of Health L  
55  
56  
57 17  
58  
59  
60 and W. Japan's ethical guidelines for epidemiologic research.

- 1  
2  
3  
4 1 2002.[http://www.lifescience.mext.go.jp/files/pdf/n796\\_01.pdf](http://www.lifescience.mext.go.jp/files/pdf/n796_01.pdf)  
5  
6  
7  
8 2 7 45 Code of Federal Regulations 46.116(d). 2009;:4–  
9  
10  
11 3 [5.https://www.hhs.gov/ohrp/regulations-and-policy/regulations/45-cfr-](https://www.hhs.gov/ohrp/regulations-and-policy/regulations/45-cfr-)  
12  
13  
14 4 [46/index.html#46.116](https://www.hhs.gov/ohrp/regulations-and-policy/regulations/45-cfr-46/index.html#46.116)  
15  
16  
17 5 8 Yamamoto E, Kato T, Ozasa N, *et al.* Kyoto Congestive Heart Failure (KCHF) study:  
18  
19  
20  
21 6 rationale and design. *ESC Hear Fail* 2017;**4**:216–23. doi:10.1002/ehf2.12138  
22  
23  
24 7 9 Yaku H, Ozasa N, Morimoto T, *et al.* Demographics, Management, and In-Hospital  
25  
26  
27  
28 8 Outcome of Hospitalized Acute Heart Failure Syndrome Patients in Contemporary  
29  
30  
31 9 Real Clinical Practice in Japan - Observations From the Prospective, Multicenter  
32  
33  
34 10 Kyoto Congestive Heart Failure (KCHF) Registry. *Circ J* 2018;**82**:2811–9.  
35  
36  
37 11 doi:10.1253/circj.CJ-17-1386  
38  
39  
40  
41 12 10 Yaku H, Kato T, Morimoto T, *et al.* Association of Mineralocorticoid Receptor  
42  
43  
44 13 Antagonist Use with All-Cause Mortality and Hospital Readmission in Older Adults  
45  
46  
47  
48 14 with Acute Decompensated Heart Failure. *JAMA Netw Open* 2019;**2**:1–14.  
49  
50  
51 15 doi:10.1001/jamanetworkopen.2019.5892  
52  
53  
54 16 11 Su K, Kato T, Toyofuku M, *et al.* Association of Previous Hospitalization for Heart  
55  
56  
57  
58 17 Failure With Increased Mortality in Patients Hospitalized for Acute Decompensated  
59  
60

- 1  
2  
3  
4 1 Heart Failure. *Circ Reports* 2019;**1**:517–24. doi:10.1253/circrep.CR-19-0054  
5  
6  
7  
8 2 12 Butler J, Gheorghiade M, Kelkar A, *et al.* In-hospital worsening heart failure. *Eur J*  
9  
10  
11 3 *Heart Fail* 2015;**17**:1104–13. doi:10.1002/ejhf.333  
12  
13  
14 4 13 Filippatos G, Farmakis D, Parissis J. Renal dysfunction and heart failure: Things are  
15  
16  
17 5 seldom what they seem. *Eur Heart J* 2014;**35**:416–8. doi:10.1093/eurheartj/ehf515  
18  
19  
20  
21 6 14 Vardeny O, Wu DH, Desai A, *et al.* Influence of baseline and worsening renal function  
22  
23  
24 7 on efficacy of spironolactone in patients with severe heart failure: Insights from rales  
25  
26  
27 8 (randomized aldactone evaluation study). *J Am Coll Cardiol* 2012;**60**:2082–9.  
28  
29  
30 9 doi:10.1016/j.jacc.2012.07.048  
31  
32  
33  
34 10 15 Clark H, Krum H, Hopper I. Worsening renal function during renin-angiotensin-  
35  
36  
37 11 aldosterone system inhibitor initiation and long-term outcomes in patients with left  
38  
39  
40  
41 12 ventricular systolic dysfunction. *Eur J Heart Fail* 2014;**16**:41–  
42  
43  
44 13 8.[http://www.embase.com/search/results?subaction=viewrecord&from=export&id=L3](http://www.embase.com/search/results?subaction=viewrecord&from=export&id=L372684240%5Cnhttp://dx.doi.org/10.1002/ejhf.13)  
45  
46  
47 14 [72684240%5Cnhttp://dx.doi.org/10.1002/ejhf.13](http://dx.doi.org/10.1002/ejhf.13)  
48  
49  
50  
51 15 16 Ponikowski P, Voors AA, Anker SD, *et al.* 2016 ESC Guidelines for the diagnosis and  
52  
53  
54 16 treatment of acute and chronic heart failure: The Task Force for the diagnosis and  
55  
56  
57 17 treatment of acute and chronic heart failure of the European Society of Cardiology  
58  
59  
60

- 1  
2  
3  
4 1 (ESC). Developed with the special contribution . *Eur J Heart Fail* 2016;**18**:891–975.  
5  
6  
7  
8 2 doi:10.1002/ejhf.592  
9  
10  
11 3 17 Oda E, Oohara K, Abe A, *et al*. The optimal cut-off point of C-reactive protein as an  
12  
13  
14 4 optional component of metabolic syndrome in Japan. *Circ J* 2006;**70**:384–8.  
15  
16  
17 5 doi:10.1253/circj.70.384  
18  
19  
20  
21 6 18 Stuck AE, Walthert JM, Nikolaus T, *et al*. Risk factors for functional status decline in  
22  
23  
24 7 community-living elderly people: a systematic literature review. *Soc Sci Med*  
25  
26  
27 8 1999;**48**:445–69. doi:10.1016/S0277-9536(98)00370-0  
28  
29  
30  
31 9 19 McCusker J, Kakuma R, Abrahamowicz M. Predictors of functional decline in  
32  
33  
34 10 hospitalized elderly patients: a systematic review. *J Gerontol A Biol Sci Med Sci*  
35  
36  
37 11 2002;**57**:M569-77.<http://www.ncbi.nlm.nih.gov/pubmed/12196493>  
38  
39  
40  
41 12 20 Covinsky KE, Palmer RM, Fortinsky RH, *et al*. Loss of independence in activities of  
42  
43  
44 13 daily living in older adults hospitalized with medical illnesses: increased vulnerability  
45  
46  
47 14 with age. *J Am Geriatr Soc* 2003;**51**:451–  
48  
49  
50  
51 15 8.<http://www.ncbi.nlm.nih.gov/pubmed/12657063>  
52  
53  
54 16 21 Inouye SK, Bogardus ST, Baker DI, *et al*. The hospital elder life program: A model of  
55  
56  
57 17 care to prevent cognitive and functional decline in older hospitalized patients. *J Am*  
58  
59  
60

- 1  
2  
3  
4 1 *Geriatr Soc* 2000;**48**:1697–706. doi:10.1111/j.1532-5415.2000.tb03885.x
- 5  
6  
7 2 22 Pandharipande PP, Girard TD, Jackson JC, *et al.* Long-term cognitive impairment after  
8  
9  
10  
11 3 critical illness. *N Engl J Med* 2013;**369**:1306–16. doi:10.1056/NEJMoa1301372  
12  
13  
14 4 23 Hirvensalo M, Rantanen T, Heikkinen E. Mobility difficulties and physical activity as  
15  
16  
17 5 predictors of mortality and loss of independence in the community-living older  
18  
19  
20  
21 6 population. *J Am Geriatr Soc* 2000;**48**:493–8. doi:10.1111/j.1532-  
22  
23  
24 7 5415.2000.tb04994.x  
25  
26  
27 8 24 Greiner PA, Snowdon DA, Schmitt FA. The loss of independence in activities of daily  
28  
29  
30 9 living: The role of low normal cognitive function in elderly nuns. *Am J Public Health*  
31  
32  
33  
34 10 1996;**86**:62–6. doi:10.2105/AJPH.86.1.62  
35  
36  
37 11 25 Ganguli M, MPH ES, PhD SB, *et al.* Cognitive Impairment and the Use of Health  
38  
39  
40  
41 12 Services in an Elderly Rural Population: The MoVIES Project. *J Am Geriatr Soc*  
42  
43  
44 13 1993;**41**:1065–70. doi:10.1111/j.1532-5415.1993.tb06453.x  
45  
46  
47 14 26 Barberger-Gateau P, Fabrigoule C. Disability and cognitive impairment in the elderly.  
48  
49  
50  
51 15 *Disabil Rehabil* 1997;**19**:175–93. <http://www.ncbi.nlm.nih.gov/pubmed/9184783>  
52  
53  
54 16 27 Black SA, Rush RD. Cognitive and functional decline in adults aged 75 and older. *J*  
55  
56  
57 17 *Am Geriatr Soc* 2002;**50**:1978–86. doi:10.1046/j.1532-5415.2002.50609.x  
58  
59  
60

- 1  
2  
3  
4 1 28 Hirsch CH, Sommers L, Olsen A, *et al.* The natural history of functional morbidity in  
5  
6  
7  
8 2 hospitalized older patients. *J Am Geriatr Soc* 1990;**38**:1296–  
9  
10  
11 3 303.<http://www.ncbi.nlm.nih.gov/pubmed/2123911>  
12  
13  
14 4 29 O'Connor CM, Whellan DJ, Lee KL, *et al.* Efficacy and safety of exercise training in  
15  
16  
17 5 patients with chronic heart failure: HF-ACTION randomized controlled trial. *JAMA*  
18  
19  
20  
21 6 2009;**301**:1439–50. doi:10.1001/jama.2009.454  
22  
23  
24 7 30 Baztán JJ, Suárez-García FM, López-Arrieta J, *et al.* Effectiveness of acute geriatric  
25  
26  
27 8 units on functional decline, living at home, and case fatality among older patients  
28  
29  
30  
31 9 admitted to hospital for acute medical disorders: Meta-analysis. *BMJ* 2009;**338**:334–6.  
32  
33  
34 10 doi:10.1136/bmj.b50  
35  
36  
37 11 31 Fox MT, Persaud M, Maimets I, *et al.* Effectiveness of acute geriatric unit care using  
38  
39  
40  
41 12 acute care for elders components: A systematic review and meta-analysis. *J Am*  
42  
43  
44 13 *Geriatr Soc* 2012;**60**:2237–45. doi:10.1111/jgs.12028  
45  
46  
47  
48 14 32 Bachmann S, Finger C, Huss A, *et al.* Inpatient rehabilitation specifically designed for  
49  
50  
51 15 geriatric patients: Systematic review and meta-analysis of randomised controlled trials.  
52  
53  
54 16 *BMJ* 2010;**340**:1230. doi:10.1136/bmj.c1718  
55  
56  
57 17 33 Reeves GR, Whellan DJ, Duncan P, *et al.* Rehabilitation Therapy in Older Acute Heart  
58  
59  
60

1  
2  
3  
4  
5  
6  
7  
8  
9  
10  
11  
12  
13  
14  
15  
16  
17  
18  
19  
20  
21  
22  
23  
24  
25  
26  
27  
28  
29  
30  
31  
32  
33  
34  
35  
36  
37  
38  
39  
40  
41  
42  
43  
44  
45  
46  
47  
48  
49  
50  
51  
52  
53  
54  
55  
56  
57  
58  
59  
60

1 Failure Patients (REHAB-HF) trial: Design and rationale. *Am Heart J* 2017;**185**:130–

2 9. doi:10.1016/j.ahj.2016.12.012

3

4

For peer review only



1  
2  
3  
4 **1 Figure legends**  
5

6  
7  
8 **2 Figure 1. Patient flowchart.** KCHF, Kyoto Congestive Heart Failure; ADHF, acute  
9  
10  
11 decompensated heart failure.  
12

13  
14 **4 Figure 2. Clinical factors associated with functional decline during hospitalization in the**  
15  
16  
17  
18 **5 univariate and multivariable logistic regression models.** OR, odds ratio; CI, confidence  
19  
20  
21 interval; BMI, body mass index; HF, heart failure; BP, blood pressure; NYHA, New York  
22  
23  
24 Heart Association; LVEF, left ventricular ejection; eGFR, estimated glomerular filtration rate.  
25

26  
27  
28 **8 Figure 3. The Cumulative incidences for the primary outcome measure (A), for all-**  
29  
30  
31 **9 cause death (B), for HF hospitalization (C), and for a composite of all-cause death or all-**  
32  
33  
34 **10 cause hospitalization (D) according to the presence or absence of functional decline.**  
35  
36  
37  
38 **11 HF=heart failure, HR=hazard ratio, CI=confidence interval.**  
39

40  
41  
42  
43  
44  
45  
46  
47  
48  
49  
50  
51  
52  
53  
54  
55  
56  
57  
58  
59  
60

**Table 1. Patient Characteristics**

|                                           | Functional decline | No functional decline | P value |
|-------------------------------------------|--------------------|-----------------------|---------|
|                                           | N=528              | N=3027                |         |
| <b>Clinical characteristics</b>           |                    |                       |         |
| Age, years                                | 85 [80–89]         | 79 [70–85]            | <0.001  |
| Age ≥80 years*†                           | 399 (76)           | 1407 (46)             | <0.001  |
| Women*†                                   | 294 (56)           | 1278 (42)             | <0.001  |
| BMI, kg/m <sup>2</sup>                    | 22.0±4.0           | 23.1±4.5              | <0.001  |
| BMI ≤22 kg/m <sup>2</sup> *†              | 269 (55)           | 1281 (44)             | <0.001  |
| <b>Medical history</b>                    |                    |                       |         |
| Prior heart failure hospitalization*†     | 186 (36)           | 1077 (36)             | 0.92    |
| Atrial fibrillation or flutter            | 220 (42)           | 1263 (42)             | 0.98    |
| Hypertension*†                            | 406 (77)           | 2174 (72)             | 0.02    |
| Diabetes mellitus*†                       | 187 (35)           | 1145 (38)             | 0.29    |
| Prior myocardial infarction*†             | 112 (21)           | 681 (23)              | 0.51    |
| Prior stroke*†                            | 125 (24)           | 432 (14)              | <0.001  |
| Current smoking*†                         | 28 (5.5)           | 425 (14)              | <0.001  |
| Malignancy                                | 97 (18)            | 419 (14)              | 0.006   |
| Chronic lung disease*†                    | 41 (7.8)           | 247 (8.2)             | 0.76    |
| Dementia*†                                | 175 (33)           | 423 (14)              | <0.001  |
| <b>Social backgrounds at admission</b>    |                    |                       |         |
| Poor medical adherence                    | 100 (19)           | 498 (16)              | 0.16    |
| Living alone*†                            | 127 (24)           | 652 (22)              | 0.20    |
| Public assistance                         | 24 (4.6)           | 186 (6.1)             | 0.14    |
| <b>Functional status before admission</b> |                    |                       |         |
| Ambulatory*†                              | 420 (80)           | 2529 (84)             | 0.02    |
| Use of wheelchair [outdoor only]          | 80 (15)            | 192 (6.3)             | <0.001  |
| Use of wheelchair [outdoor and indoor]    | 28 (5.3)           | 306 (10)              | <0.001  |
| <b>Origin</b>                             |                    |                       |         |
| Ischemic                                  | 134 (25)           | 820 (27)              | 0.41    |
| Acute coronary syndrome*†                 | 36 (6.8)           | 166 (5.5)             | 0.22    |
| Hypertensive                              | 131 (25)           | 754 (25)              | 0.96    |
| Valvular                                  | 124 (23)           | 565 (19)              | <0.001  |

|    |                                          |                    |                   |        |
|----|------------------------------------------|--------------------|-------------------|--------|
| 1  |                                          |                    |                   |        |
| 2  |                                          |                    |                   |        |
| 3  | Cardiomyopathy                           | 54 (10)            | 492 (16)          | <0.001 |
| 4  |                                          |                    |                   |        |
| 5  | Vital signs and symptoms at presentation |                    |                   |        |
| 6  |                                          |                    |                   |        |
| 7  | BP, mmHg                                 |                    |                   |        |
| 8  | Systolic BP                              | 144±32             | 149±35            | 0.003  |
| 9  |                                          |                    |                   |        |
| 10 | Systolic BP ≥140 mmHg                    | 275 (53)           | 1741 (58)         | 0.03   |
| 11 |                                          |                    |                   |        |
| 12 | Systolic BP <90 mmHg*†                   | 12 (2.3)           | 76 (2.5)          | 0.76   |
| 13 |                                          |                    |                   |        |
| 14 | Diastolic BP                             | 81±23              | 86±24             | <0.001 |
| 15 | Heart rate, beat/min                     | 93±27              | 96±28             | 0.001  |
| 16 |                                          |                    |                   |        |
| 17 | Heart rate <60 beat/min*†                | 44 (8.5)           | 195 (6.5)         | 0.11   |
| 18 | Body temperature, °C                     | 36.6±0.7           | 36.5±0.6          | <0.001 |
| 19 |                                          |                    |                   |        |
| 20 | Body temperature ≥37.5°C*†               | 58 (11)            | 154 (5.3)         | <0.001 |
| 21 |                                          |                    |                   |        |
| 22 | Rhythms at presentation                  |                    |                   |        |
| 23 | Sinus rhythm                             | 280 (53)           | 1715 (57)         | 0.12   |
| 24 |                                          |                    |                   |        |
| 25 | Atrial fibrillation or flutter*†         | 198 (38)           | 1085 (36)         | 0.47   |
| 26 |                                          |                    |                   |        |
| 27 | NYHA class III or IV*†                   | 482 (92)           | 2598 (73)         | <0.001 |
| 28 |                                          |                    |                   |        |
| 29 | Tests at admission                       |                    |                   |        |
| 30 | LVEF                                     | 48±16              | 46±16             | 0.02   |
| 31 |                                          |                    |                   |        |
| 32 | HFrEF (EF<40%)*†                         | 167 (32)           | 1148 (38)         | 0.006  |
| 33 |                                          |                    |                   |        |
| 34 | HFmrEF (EF 40–49%)                       | 117 (22)           | 566 (19)          | 0.06   |
| 35 |                                          |                    |                   |        |
| 36 | HFpEF (EF ≥50%)                          | 242 (46)           | 1305 (43)         | 0.24   |
| 37 | Haemoglobin, g/dL                        | 11.0±2.1           | 11.7±2.4          | <0.001 |
| 38 |                                          |                    |                   |        |
| 39 | Anaemia*†‡                               | 401 (76)           | 1946 (64)         | <0.001 |
| 40 | BNP, pg/ml                               | 782 [448–1410]     | 687 [375–1214]    | <0.001 |
| 41 |                                          |                    |                   |        |
| 42 | NT-proBNP, pg/ml                         | 10795 [3450–18000] | 5416 [2629–11438] | 0.001  |
| 43 |                                          |                    |                   |        |
| 44 | Creatinine, mg/dL                        | 1.2 [0.8–1.6]      | 1.1 [0.8–1.6]     | 0.21   |
| 45 | eGFR, ml/min/1.73m <sup>2</sup>          | 38 [24–54]         | 46 [30–62]        | <0.001 |
| 46 |                                          |                    |                   |        |
| 47 | eGFR <30 ml/min/1.73m <sup>2</sup> *†    | 195 (37)           | 747 (25)          | <0.001 |
| 48 |                                          |                    |                   |        |
| 49 | Blood urea nitrogen, mg/dL               | 28 (20–39)         | 23 (17–33)        | <0.001 |
| 50 |                                          |                    |                   |        |
| 51 | Albumin, g/dL                            | 3.3±0.5            | 3.5±0.5           | <0.001 |
| 52 |                                          |                    |                   |        |
| 53 | Albumin <3.0 g/dL*†                      | 112 (22)           | 332 (11)          | <0.001 |
| 54 |                                          |                    |                   |        |
| 55 | Sodium, mEq/L                            | 138±4.7            | 139±4.1           | <0.001 |
| 56 |                                          |                    |                   |        |
| 57 | Sodium <135 mEq/L*†                      | 83 (16)            | 325 (11)          | 0.001  |
| 58 |                                          |                    |                   |        |
| 59 | Potassium, mEq/L                         | 4.3±0.8            | 4.2±0.6           | 0.03   |
| 60 |                                          |                    |                   |        |
|    | Clinical signs and symptoms at discharge |                    |                   |        |

|    |                                        |          |           |        |
|----|----------------------------------------|----------|-----------|--------|
| 1  |                                        |          |           |        |
| 2  |                                        |          |           |        |
| 3  | Oedema†                                | 89 (17)  | 320 (11)  | <0.001 |
| 4  | General malaise†                       | 152 (31) | 388 (14)  | <0.001 |
| 5  |                                        |          |           |        |
| 6  | Medications at discharge               |          |           |        |
| 7  |                                        |          |           |        |
| 8  | Number of drugs prescribed             | 8 (6–11) | 9 (6–11)  | 0.12   |
| 9  |                                        |          |           |        |
| 10 | Loop diuretics†                        | 428 (81) | 2472 (82) | 0.74   |
| 11 |                                        |          |           |        |
| 12 | ACEI or ARB†                           | 242 (46) | 1838 (61) | <0.001 |
| 13 |                                        |          |           |        |
| 14 | MRA†                                   | 208 (39) | 1409 (47) | 0.002  |
| 15 |                                        |          |           |        |
| 16 | Beta blocker†                          | 287 (54) | 2101 (69) | <0.001 |
| 17 |                                        |          |           |        |
| 18 | Tolvaptan                              | 76 (14)  | 299 (9.9) | 0.002  |
| 19 | Functional status at discharge         |          |           |        |
| 20 |                                        |          |           |        |
| 21 | Ambulatory                             | 0        | 2682 (89) | <0.001 |
| 22 |                                        |          |           |        |
| 23 | Use of wheelchair [outdoor only]       | 184 (35) | 160 (5.3) | <0.001 |
| 24 |                                        |          |           |        |
| 25 | Use of wheelchair [outdoor and indoor] | 261 (49) | 185 (6.1) | <.0001 |
| 26 |                                        |          |           |        |
| 27 | Bedridden                              | 83 (16)  | 0         | <0.001 |
| 28 | Living place after discharge           |          |           |        |
| 29 |                                        |          |           |        |
| 30 | Home                                   | 247 (47) | 2709 (90) | <0.001 |
| 31 |                                        |          |           |        |
| 32 | Hospital                               | 225 (43) | 180 (6.0) | <0.001 |
| 33 |                                        |          |           |        |
| 34 | Institution for the aged               | 50 (9.5) | 114 (3.8) | <0.001 |
| 35 |                                        |          |           |        |
| 36 | Other                                  | 4 (0.8)  | 17 (0.6)  | 0.59   |

Abbreviations: BMI, body mass index; BP, blood pressure; NYHA, New York Heart Association; LVEF, left ventricular ejection fraction; HF<sub>r</sub>EF, heart failure with reduced ejection fraction; HF<sub>mr</sub>EF, heart failure with mid-range ejection fraction; HF<sub>pe</sub>EF, heart failure with preserved ejection fraction; BNP, brain-type natriuretic peptide; NT-proBNP, N-terminal-proBNP; eGFR, estimated glomerular filtration rate; ACEI, angiotensin converting enzyme inhibitor; ARB, angiotensin receptor blocker; MRA, mineralocorticoid receptor antagonist.

Continuous variables were presented as mean ± SD or median with [interquartile range]. Categorical variables were presented as number (percentage).

\* Risk-adjusting variables were selected for multivariable logistic regression models.

† Risk-adjusting variables were selected for multivariable Cox proportional hazard models.

‡ Defined by the World Health Organization criteria (haemoglobin <12 g/dL for women and <13 g/dL for men).

**Table 2. In-hospital Management and Outcome**

|                                                               | <b>Functional decline</b> | <b>No functional decline</b> | <b>P value</b> |
|---------------------------------------------------------------|---------------------------|------------------------------|----------------|
|                                                               | N=528                     | N=3027                       |                |
| <b>In-hospital management</b>                                 |                           |                              |                |
| Management in the emergency room                              |                           |                              |                |
| Respiratory management                                        |                           |                              |                |
| Oxygen inhalation                                             | 295 (56)                  | 1382 (46)                    | <0.001         |
| NIPPV                                                         | 82 (16)                   | 423 (14)                     | 0.35           |
| Intubation                                                    | 11 (2.1)                  | 53 (1.8)                     | 0.60           |
| Intravenous drugs within 24 hours after hospital presentation |                           |                              |                |
| Inotropes                                                     | 101 (19)                  | 405 (13)                     | <0.001         |
| Furosemide                                                    | 446 (85)                  | 2536 (84)                    | 0.69           |
| <b>In-hospital clinical outcomes</b>                          |                           |                              |                |
| In-hospital adverse events                                    |                           |                              |                |
| Stroke                                                        | 27 (5.1)                  | 26 (0.9)                     | <0.001         |
| Worsening heart failure                                       | 130 (25)                  | 490 (16)                     | <0.001         |
| Worsening renal function                                      | 244 (47)                  | 992 (33)                     | <0.001         |
| In-hospital infection                                         | 104 (20)                  | 258 (8.5)                    | <0.001         |
| Length of stay, day                                           | 21 [14–37]                | 15 [11–22]                   | <0.001         |

Abbreviations: NIPPV, non-invasive intermittent positive pressure ventilation.

1 **Table 3. Clinical outcomes in the entire cohort**

| Outcomes                                        | Functional decline                                                                          | No functional decline                                                                       | Unadjusted HR<br>(95% CI) | P value | Adjusted HR<br>(95% CI) | P value |
|-------------------------------------------------|---------------------------------------------------------------------------------------------|---------------------------------------------------------------------------------------------|---------------------------|---------|-------------------------|---------|
|                                                 | N of patients with event / N<br>of patients at risk<br>(Cumulative 1-year<br>incidence [%]) | N of patients with event / N<br>of patients at risk<br>(Cumulative 1-year<br>incidence [%]) |                           |         |                         |         |
| All-cause death or HF<br>hospitalization        | 243/528 (49)                                                                                | 902/3027 (31)                                                                               | 1.95<br>(1.71–2.21)       | <0.001  | 1.46<br>(1.24–1.71)     | <0.001  |
| All-cause death                                 | 174/528 (36)                                                                                | 386/3027 (13)                                                                               | 3.02<br>(2.58–3.53)       | <0.001  | 2.12<br>(1.74–2.58)     | <0.001  |
| HF hospitalization                              | 116/528 (28)                                                                                | 663/3027 (23)                                                                               | 1.25<br>(1.04–1.50)       | 0.02    | 1.03<br>(0.83–1.28)     | 0.81    |
| All-cause death or All-cause<br>hospitalization | 279/528 (57)                                                                                | 1186/3027 (40)                                                                              | 1.69<br>(1.50–1.91)       | <0.001  | 1.39<br>(1.20–1.61)     | <0.001  |

The number of patients with at least one event was counted through the 1-year follow-up period.

Abbreviations: HF, heart failure; HR, hazard ratio; CI, confidence interval.

# KCHF registry

**4056 patients hospitalized with ADHF**  
(Oct 2014-Mar 2016, 19 centers in Japan)

**In-hospital death during index hospitalization (N=271)**

**Excluded (N=230)**

No data about functional status (n = 99)

Bedridden before index hospitalization (n = 131)

## Study population:

**Patients discharged alive assessed for functional decline during hospitalization**  
**3555 patients**

**Functional decline: 528 patients**

**No functional decline: 3027 patients**

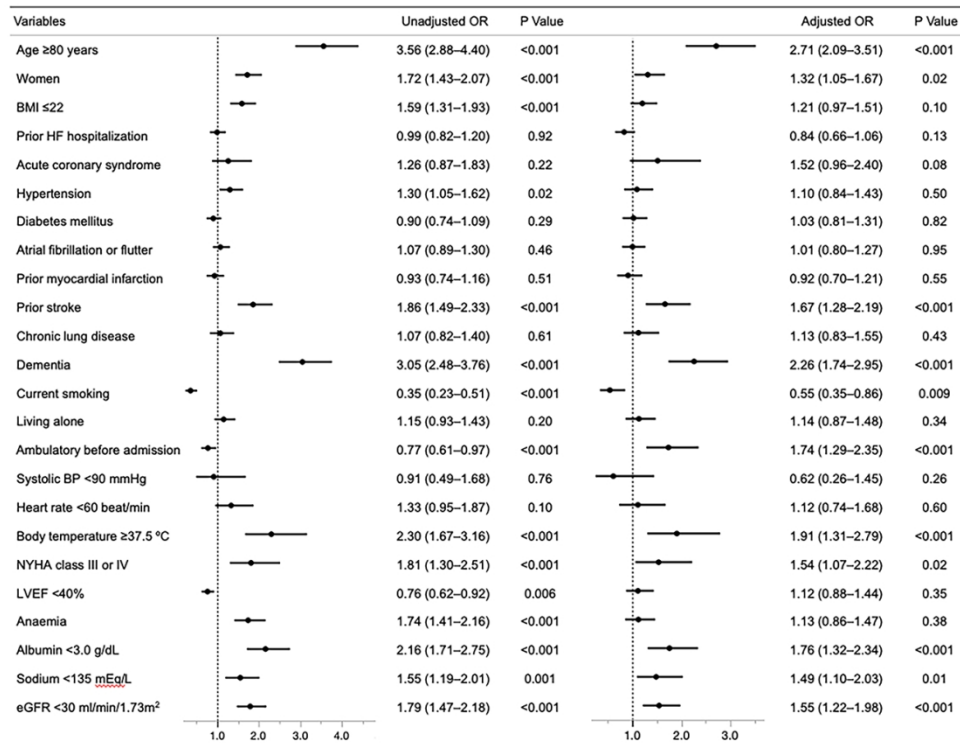

Figure 2. Clinical factors associated with functional decline during hospitalization in the univariate and multivariable logistic regression models.



Figure 3A

**All-cause death or HF hospitalization**

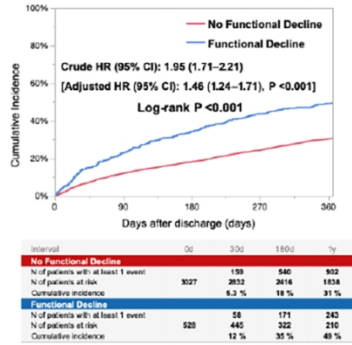

Figure 3B

**All-cause death**

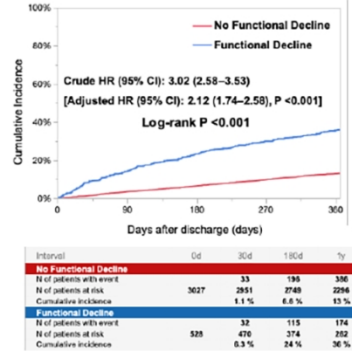

Figure 3C

**HF hospitalization**

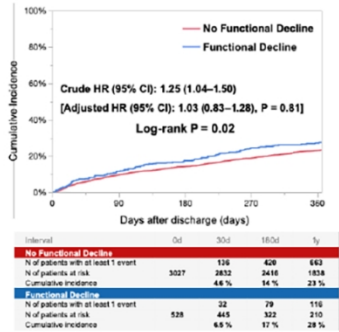

Figure 3D

**All-cause death or All-cause hospitalization**

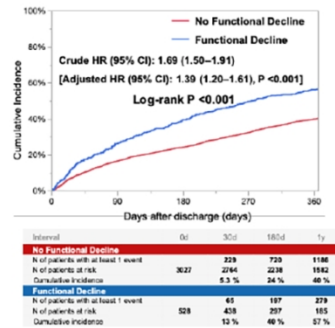

Figure 3. The Cumulative incidences for the primary outcome measure (A), for all-cause death (B), for HF hospitalization (C), and for a composite of all-cause death or all-cause hospitalization (D) according to the presence or absence of functional decline.

## Supplementary Online Content

**eTable 1.** Number of missing values in in the entire cohort

**eTable 2.** Clinical factors associated with functional decline or in-hospital mortality in the univariate and multivariable analyses in a total of 4056 patients

**eFigure 1.** The details of functional decline during ADHF Hospitalization.

**eFigure 2.** Subgroup analysis for the association of functional decline with no functional decline on the primary outcome measure.

For peer review only

**eTable 1. Number of missing values in the entire cohort**

|                     | Entire Cohort (N=3555) |          |
|---------------------|------------------------|----------|
|                     | Number                 | Rate (%) |
| Tests at admission  |                        |          |
| BNP or NT-proBNP *  | 41                     | 1.15     |
| Serum creatinine    | 5                      | 0.14     |
| eGFR                | 5                      | 0.14     |
| Blood urea nitrogen | 8                      | 0.22     |
| Albumin             | 100                    | 2.81     |
| Sodium              | 11                     | 0.31     |
| Potassium           | 11                     | 0.31     |
| Haemoglobin         | 6                      | 0.17     |

\* BNP values were reported for 3140 patients in the entire cohort; NT-proBNP values were reported for 633 patients in the entire cohort.

Abbreviation: BNP, brain-type natriuretic peptide; NT-proBNP, N-terminal-proBNP; eGFR, estimated glomerular filtration rate.

**eTable 2. Clinical factors associated with functional decline or in-hospital mortality in the univariate and multivariable analyses in a total of 4056 patients**

| Variables                          | Unadjusted OR<br>(95% CI) | P Value | Adjusted OR<br>(95% CI) | P Value |
|------------------------------------|---------------------------|---------|-------------------------|---------|
| Age ≥80 years                      | 2.97 (2.50–3.52)          | <0.001  | 2.32 (1.86–2.89)        | <0.001  |
| Women                              | 1.45 (1.25–1.70)          | <0.001  | 1.13 (0.93–1.38)        | 0.22    |
| BMI ≤22                            | 1.56 (1.32–1.83)          | <0.001  | 1.21 (1.00–1.47)        | 0.053   |
| Prior HF hospitalization           | 1.08 (0.92–1.27)          | 0.36    | 0.96 (0.79–1.18)        | 0.72    |
| Acute coronary syndrome            | 1.56 (1.16–2.11)          | 0.003   | 1.76 (1.19–2.60)        | 0.005   |
| Hypertension                       | 1.00 (0.85–1.20)          | 0.95    | 0.96 (0.77–1.21)        | 0.75    |
| Diabetes mellitus                  | 0.86 (0.73–1.01)          | 0.06    | 0.88 (0.72–1.09)        | 0.25    |
| Atrial fibrillation or flutter     | 0.97 (0.83–1.13)          | 0.67    | 0.99 (0.81–1.21)        | 0.90    |
| Prior myocardial infarction        | 0.94 (0.78–1.13)          | 0.50    | 0.89 (0.71–1.13)        | 0.36    |
| Prior stroke                       | 1.73 (1.43–2.10)          | <0.001  | 1.57 (1.24–1.99)        | <0.001  |
| Chronic lung disease               | 1.11 (0.89–1.39)          | 0.37    | 1.16 (0.88–1.52)        | 0.29    |
| Dementia                           | 2.91 (2.44–3.47)          | <0.001  | 2.24 (1.78–2.82)        | <0.001  |
| Current smoking                    | 0.37 (0.27–0.51)          | <0.001  | 0.55 (0.38–0.81)        | 0.002   |
| Living alone                       | 1.05 (0.87–1.27)          | 0.62    | 1.14 (0.91–1.44)        | 0.26    |
| Ambulatory before admission        | 0.64 (0.54–0.77)          | <0.001  | 1.44 (1.13–1.84)        | 0.003   |
| Systolic BP <90 mmHg               | 2.01 (1.37–2.96)          | <0.001  | 1.17 (0.66–2.05)        | 0.59    |
| Heart rate <60 beat/min            | 1.07 (0.79–0.79)          | 0.66    | 1.03 (0.71–1.49)        | 0.88    |
| Body temperature ≥37.5 °C          | 2.26 (1.72–2.7)           | <0.001  | 1.89 (1.35–2.63)        | <0.001  |
| NYHA class III or IV               | 2.17 (1.62–2.91)          | <0.001  | 1.73 (1.24–2.41)        | 0.001   |
| LVEF <40%                          | 1.04 (0.89–1.22)          | 0.61    | 1.24 (1.00–1.52)        | 0.047   |
| Anaemia*                           | 1.67 (1.39–1.98)          | <0.001  | 1.08 (0.86–1.36)        | 0.51    |
| Albumin <3.0 g/dL                  | 2.30 (1.89–2.81)          | <0.001  | 1.91 (1.50–2.43)        | <0.001  |
| Sodium <135 mEq/L                  | 1.89 (1.53–2.33)          | <0.001  | 1.72 (1.34–2.22)        | <0.001  |
| eGFR <30 ml/min/1.73m <sup>2</sup> | 2.01 (1.70–2.36)          | <0.001  | 1.78 (1.45–2.19)        | <0.001  |

\*Defined by the World Health Organization criteria (haemoglobin <12 g/dL for women and <13 g/dL for men).

Abbreviations: OR, odds ratio; CI, confidence interval; BMI, body mass index; HF, heart failure; BP, blood pressure; NYHA, New York Heart Association; LVEF, left ventricular ejection; eGFR, estimated glomerular filtration rate;.

**eFigure 1. The details of functional decline during ADHF hospitalization.** Functional status at discharge according to functional status before admission is shown. ADHF, acute decompensated heart failure.

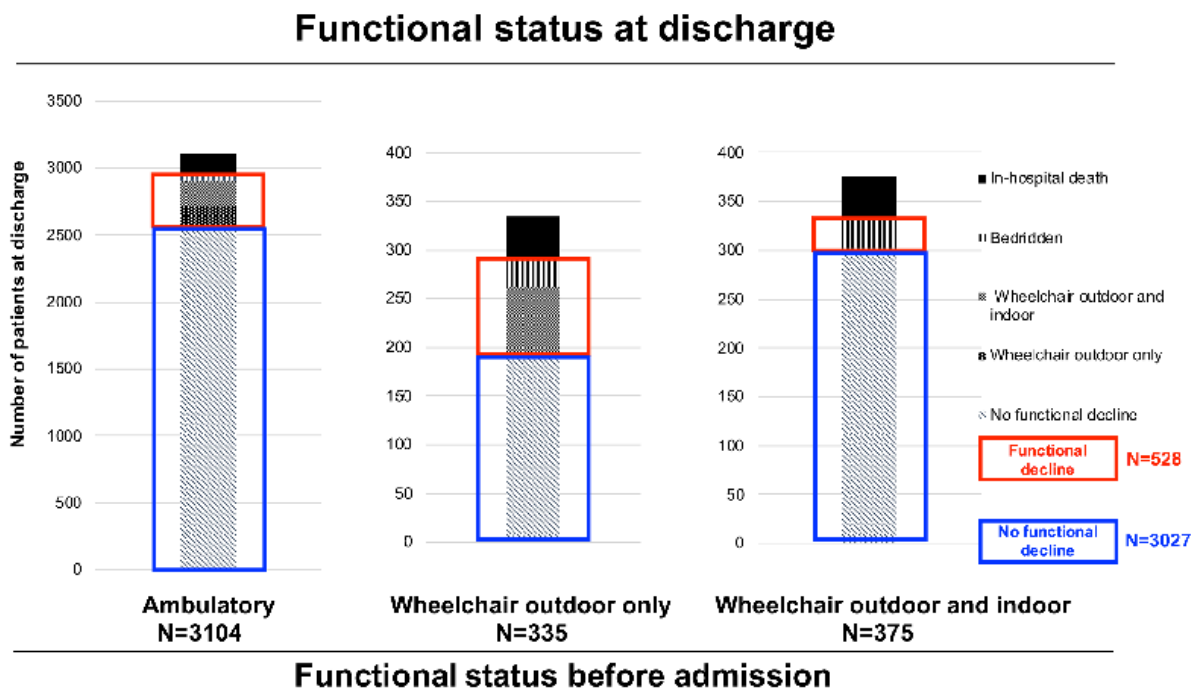

**eFigure 2. Subgroup analysis for the association of functional decline with no functional decline on the primary outcome measure. LVEF, left ventricular ejection fraction; HR, hazard ratio; CI, confidence interval.**

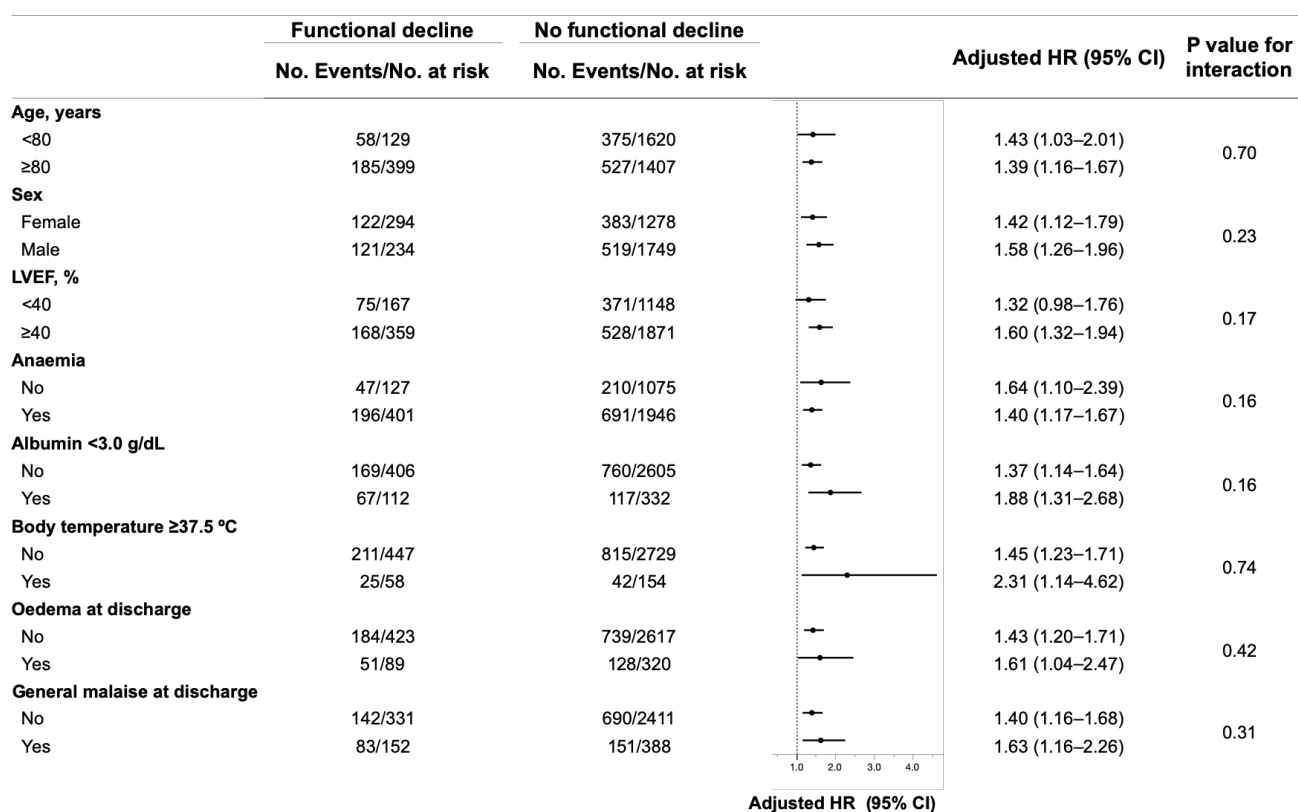

**STROBE 2007 (v4) Statement—Checklist of items that should be included in reports of *cohort studies***

| Section/Topic                | Item # | Recommendation                                                                                                                                                                       | Reported on page # |
|------------------------------|--------|--------------------------------------------------------------------------------------------------------------------------------------------------------------------------------------|--------------------|
| <b>Title and abstract</b>    | 1      | (a) Indicate the study's design with a commonly used term in the title or the abstract                                                                                               | Page 1             |
|                              |        | (b) Provide in the abstract an informative and balanced summary of what was done and what was found                                                                                  | Page 3-4           |
| <b>Introduction</b>          |        |                                                                                                                                                                                      |                    |
| Background/rationale         | 2      | Explain the scientific background and rationale for the investigation being reported                                                                                                 | Page 6             |
| Objectives                   | 3      | State specific objectives, including any prespecified hypotheses                                                                                                                     | Page 8             |
| <b>Methods</b>               |        |                                                                                                                                                                                      |                    |
| Study design                 | 4      | Present key elements of study design early in the paper                                                                                                                              | Page 7             |
| Setting                      | 5      | Describe the setting, locations, and relevant dates, including periods of recruitment, exposure, follow-up, and data collection                                                      | Page 7-8           |
| Participants                 | 6      | (a) Give the eligibility criteria, and the sources and methods of selection of participants. Describe methods of follow-up                                                           | Page 8             |
|                              |        | (b) For matched studies, give matching criteria and number of exposed and unexposed                                                                                                  |                    |
| Variables                    | 7      | Clearly define all outcomes, exposures, predictors, potential confounders, and effect modifiers. Give diagnostic criteria, if applicable                                             | Page 8-10          |
| Data sources/<br>measurement | 8*     | For each variable of interest, give sources of data and details of methods of assessment (measurement). Describe comparability of assessment methods if there is more than one group | Page 8             |
| Bias                         | 9      | Describe any efforts to address potential sources of bias                                                                                                                            | Page 10            |
| Study size                   | 10     | Explain how the study size was arrived at                                                                                                                                            | Page 8             |
| Quantitative variables       | 11     | Explain how quantitative variables were handled in the analyses. If applicable, describe which groupings were chosen and why                                                         | Page 9             |
| Statistical methods          | 12     | (a) Describe all statistical methods, including those used to control for confounding                                                                                                | Page 9-10          |
|                              |        | (b) Describe any methods used to examine subgroups and interactions                                                                                                                  | Page 10-11         |
|                              |        | (c) Explain how missing data were addressed                                                                                                                                          | Page 9             |
|                              |        | (d) If applicable, explain how loss to follow-up was addressed                                                                                                                       | Page               |
|                              |        | (e) Describe any sensitivity analyses                                                                                                                                                | Page 11            |
| <b>Results</b>               |        |                                                                                                                                                                                      |                    |

|                          |     |                                                                                                                                                                                                              |            |
|--------------------------|-----|--------------------------------------------------------------------------------------------------------------------------------------------------------------------------------------------------------------|------------|
| Participants             | 13* | (a) Report numbers of individuals at each stage of study—eg numbers potentially eligible, examined for eligibility, confirmed eligible, included in the study, completing follow-up, and analysed            | Page 12    |
|                          |     | (b) Give reasons for non-participation at each stage                                                                                                                                                         | Page 8     |
|                          |     | (c) Consider use of a flow diagram                                                                                                                                                                           | Page 7-8   |
| Descriptive data         | 14* | (a) Give characteristics of study participants (eg demographic, clinical, social) and information on exposures and potential confounders                                                                     | Page 12    |
|                          |     | (b) Indicate number of participants with missing data for each variable of interest                                                                                                                          | Page 7-8   |
|                          |     | (c) Summarise follow-up time (eg, average and total amount)                                                                                                                                                  | Page 12    |
| Outcome data             | 15* | Report numbers of outcome events or summary measures over time                                                                                                                                               | Page 14    |
| Main results             | 16  | (a) Give unadjusted estimates and, if applicable, confounder-adjusted estimates and their precision (eg, 95% confidence interval). Make clear which confounders were adjusted for and why they were included | Page 13-15 |
|                          |     | (b) Report category boundaries when continuous variables were categorized                                                                                                                                    | Page 10-11 |
|                          |     | (c) If relevant, consider translating estimates of relative risk into absolute risk for a meaningful time period                                                                                             | Page 14-15 |
| Other analyses           | 17  | Report other analyses done—eg analyses of subgroups and interactions, and sensitivity analyses                                                                                                               | Page 15-16 |
| <b>Discussion</b>        |     |                                                                                                                                                                                                              |            |
| Key results              | 18  | Summarise key results with reference to study objectives                                                                                                                                                     | Page 16    |
| <b>Limitations</b>       |     |                                                                                                                                                                                                              |            |
| Interpretation           | 20  | Give a cautious overall interpretation of results considering objectives, limitations, multiplicity of analyses, results from similar studies, and other relevant evidence                                   | Page 19-20 |
| Generalisability         | 21  | Discuss the generalisability (external validity) of the study results                                                                                                                                        | Page 19-20 |
| <b>Other information</b> |     |                                                                                                                                                                                                              |            |
| Funding                  | 22  | Give the source of funding and the role of the funders for the present study and, if applicable, for the original study on which the present article is based                                                | Page 22    |

\*Give information separately for cases and controls in case-control studies and, if applicable, for exposed and unexposed groups in cohort and cross-sectional studies.

**Note:** An Explanation and Elaboration article discusses each checklist item and gives methodological background and published examples of transparent reporting. The STROBE checklist is best used in conjunction with this article (freely available on the Web sites of PLoS Medicine at <http://www.plosmedicine.org/>, Annals of Internal Medicine at <http://www.annals.org/>, and Epidemiology at <http://www.epidem.com/>). Information on the STROBE Initiative is available at [www.strobe-statement.org](http://www.strobe-statement.org).
